## 18 **Abstract**

19 The lack of cultured isolates and microbial genomes from the deep seabed means that very little  
20 is known about the ecology of this vast habitat. Here, we investigated energy and carbon  
21 acquisition strategies of microbial communities from three deep seabed petroleum seeps (3 km  
22 water depth) in the Eastern Gulf of Mexico. Shotgun metagenomic analysis revealed that each  
23 sediment harbored diverse communities of chemoheterotrophs and chemolithotrophs. We  
24 recovered 82 metagenome-assembled genomes affiliated with 21 different archaeal and bacterial  
25 phyla. Multiple genomes encoded enzymes for acetogenic fermentation of aliphatic and aromatic  
26 compounds, specifically those of candidate phyla *Aerophobetes*, *Aminicenantes*, TA06 and  
27 *Bathyarchaeota*. Microbial interactions in these communities are predicted to be driven by  
28 acetate and molecular hydrogen, as indicated by a high abundance of fermentation, acetogenesis,  
29 and hydrogen utilization pathways. These findings are supported by sediment geochemistry,  
30 metabolomics and thermodynamic modelling of hydrocarbon degradation. Overall, we infer that  
31 deep-sea sediments experiencing thermogenic hydrocarbon inputs harbor phylogenetically and  
32 functionally diverse communities potentially sustained through anaerobic hydrocarbon, acetate  
33 and hydrogen metabolism.

34 Deep-sea sediments, generally understood to be those occurring in water depths greater than  
35 ~500 meters, represent one of the largest habitats on Earth. In recent years, culture-independent  
36 16S rRNA gene surveys and metagenomic studies have revealed these sediments host a vast  
37 abundance and diversity of bacteria and archaea<sup>1-8</sup>. Cell numbers decrease with sediment depth  
38 and age, from between  $10^6$  and  $10^{10}$  cm<sup>-3</sup> in the upper cm at the sediment-water interface to  
39 below  $10^4$  cm<sup>-3</sup> several kilometers below the ocean floor<sup>9, 10</sup>. However, due to a lack of cultured  
40 representatives and genomes recovered from deep-sea sediments, it remains largely unresolved  
41 how microorganisms survive and function in these nutrient-limited ecosystems. Energy and  
42 carbon sources are essential requirements that allow the buried microorganisms to persist. With  
43 sunlight penetration not reaching the deep seabed, photosynthetic processes do not directly  
44 support these communities<sup>11</sup>. It has therefore been proposed that deep sea benthic and  
45 subsurface microbes are primarily sustained by complex detrital organic matter, including  
46 carbohydrates, proteinaceous compounds, and humic substances, derived from the overlying  
47 water column via sedimentation<sup>11-13</sup>.

48 Another important potential carbon and energy source in deep-sea sediments are petroleum  
49 geofluids that migrate from subseafloor reservoirs up to the seafloor<sup>14</sup>. Petroleum compounds  
50 include smaller gaseous molecules, such as methane, propane and butane, and larger aliphatic  
51 and aromatic liquids. Numerous studies have investigated the role of methane oxidation in  
52 seabed sediments, which is mediated by anaerobic methanotrophic archaea (ANME), generally  
53 in syntrophy with bacteria respiring sulfate or other electron acceptors<sup>4, 6, 8, 15, 16</sup>. In contrast,  
54 little is known about the degradation of larger alkanes or aromatic compounds by deep seabed  
55 microorganisms. Vigneron et al.<sup>2</sup> performed a comparative gene-centric study of hydrocarbon  
56 and methane seeps of the Gulf of Mexico, and suggested that microorganisms in deep cold seeps

57 (water depth ~1 km) can potentially utilize a range of non-methane hydrocarbons. However, due  
58 to the absence of metagenome binning in that study, relevant metabolic functions were not  
59 assigned to specific pathways or taxa.

60 In addition to organic carbon compounds, microbial life in deep-sea sediments is also supported  
61 by inorganic electron donors. Some microorganisms have been isolated from deep sediments that  
62 are able to sustain themselves by oxidizing elemental sulfur, hydrogen sulfide, carbon monoxide,  
63 ammonia and molecular hydrogen (H<sub>2</sub>)<sup>6, 8, 11</sup>. Of these, H<sub>2</sub> is a particularly important energy  
64 source given its production in large quantities by biological and geochemical processes. H<sub>2</sub> can  
65 be generated as a metabolic byproduct of fermentation, together with volatile fatty acids such as  
66 acetate, during organic matter degradation<sup>9, 17</sup>. H<sub>2</sub> can also be produced abiotically via  
67 serpentinization, radiolysis of water, or thermal alteration of sedimentary organic matter<sup>18</sup>. For  
68 example, the radiolysis of water by naturally occurring radionuclides (*e.g.* <sup>40</sup>K and <sup>238</sup>U) is  
69 estimated to produce 10<sup>11</sup> mol H<sub>2</sub> per year<sup>8, 19</sup>. Depending on the availability of electron  
70 acceptors, H<sub>2</sub> oxidation can be coupled to sulfate, nitrate, metal, and organohalide respiration, as  
71 well as acetogenesis and methanogenesis<sup>8, 11</sup>.

72 To develop understanding of the role of hydrocarbon substrates metabolic processes in  
73 supporting microbial life in deep-sea sediments, we performed metagenomic, geochemical and  
74 metabolomic analyses of three deep seabed sediments (water depth ~3km). The three sites  
75 exhibited different levels of migrated thermogenic hydrocarbons. Metagenomes generated from  
76 sediment samples of each site were assembled and binned to obtain metagenome-assembled  
77 genomes (MAGs) and to reconstruct metabolic pathways for dominant members of the microbial  
78 communities. Complementing this genome-resolved metagenomics, a gene-centric analysis was

79 performed by directly examining unassembled metagenomic data. Through the combination of  
80 metagenomics with geochemistry and metabolomics, with supporting thermodynamic modeling,  
81 we provide evidence that (1) deep-sea sediments harbor phylogenetically diverse heterotrophic  
82 and lithotrophic microbial communities; (2) some members from the candidate phyla are  
83 engaged in degradation of aliphatic and aromatic thermogenic hydrocarbons; and (3) microbial  
84 community members are likely interconnected via acetate and hydrogen metabolism.

## 85 **Results**

### 86 **Sediment geochemistry**

87 This study tested three petroleum-associated near-surface sediments (referred to as Sites E26,  
88 E29 and E44) sampled from the Eastern Gulf of Mexico<sup>20</sup>. Petroleum content and other  
89 geochemical characteristics were analyzed for each of the three sites (Table 1). All sites had high  
90 concentrations of aromatic compounds and liquid alkanes; aromatic compounds were most  
91 abundant at Site E26, while liquid alkanes were at 2.5-fold higher concentration at Sites E26 and  
92 E29 than Site E44. Alkane gases were only abundant at Site E29 and were almost exclusively  
93 methane (CH<sub>4</sub>). CH<sub>4</sub> sources can be inferred from stable isotopic compositions of CH<sub>4</sub> and molar  
94 ratios of CH<sub>4</sub> to higher hydrocarbons<sup>15</sup>. Ratios of C<sub>1</sub>/(C<sub>2</sub>+C<sub>3</sub>) were greater than 1,000 and δ<sup>13</sup>C  
95 values of methane were more negative than -60‰, indicating that the CH<sub>4</sub> in these sediments is  
96 predominantly biogenic<sup>15,21</sup>. GC-MS revealed an unresolved complex mixture (UCM) of  
97 saturated hydrocarbons in the C<sub>15+</sub> range in all three sites. Such UCM signals correspond to  
98 degraded petroleum hydrocarbons and may indicate the occurrence of oil biodegradation at these  
99 sites<sup>22</sup>. Signature metabolites for anaerobic biodegradation of alkanes and aromatic compounds  
100<sup>23</sup> were also detected, including benzoate, toluate and methyl- or trimethylsilyl esters (Table S1).

101 High concentrations of sulfate (>20 mM) were detected at each of the three sites (Table 1),  
102 consistent with sulfate being present in high concentrations in seawater and diffusing into the  
103 sediments. H<sub>2</sub> and acetate concentrations were both below limits of detection (0.015-0.1 nM and  
104 2.5 μM, respectively); this is consistent with previous observations in deep-sea sediments  
105 showing that H<sub>2</sub> and acetate is present at extremely low steady-state concentrations due to tight  
106 coupling between producers and consumers<sup>3, 15</sup>.

### 107 **Deep-sea sediments harbor phylogenetically diverse bacterial and archaeal communities**

108 Illumina NextSeq sequencing of genomic DNA from deep-sea sediment communities produced  
109 85,825,930, 148,908,270, and 138,795,692 quality-filtered reads for Sites E26, E29, and E44,  
110 respectively (Table S2). The 16S rRNA gene amplicon sequencing results suggest the sediments  
111 harbor diverse bacterial and archaeal communities, with Chao1 richness estimates of 359, 1375  
112 and 360 amplicon sequence variants (ASVs) using bacterial-specific primers, and 195, 180 and  
113 247 ASVs using archaeal-specific primers, for Sites E26, E29 and E44, respectively (Table S3  
114 and Figure S1). Taxonomic profiling of these metagenomes using small subunit ribosomal RNA  
115 (SSU rRNA) marker genes demonstrated that the most abundant phyla in the metagenomes were,  
116 in decreasing order, *Chloroflexi* (mostly classes *Dehalococcoidia* and *Anaerolineae*), *Candidatus*  
117 *Atribacteria*, *Proteobacteria* (mostly class *Deltaproteobacteria*), and *Candidatus* Bathyarchaeota  
118 (Figure 1a). While the three sites share a broadly similar community composition, notable  
119 differences were *Ca.* Bathyarchaeota and *Proteobacteria* being in higher relative abundance at  
120 the sites with more hydrocarbons (E29 and E26; Table 1), whereas the inverse is true for  
121 *Actinobacteria*, the Patescibacteria group, and *Ca.* Aerophobetes that are all present in higher  
122 relative abundance at Site E44 where hydrocarbon levels are lower. Additional sampling is

123 required to determine whether these differences are due to the presence of hydrocarbons or other  
124 factors.

125 Assembly and binning for the three metagenomes resulted in a total of 82 MAGs with >50%  
126 completeness and <10% contamination based on CheckM analysis<sup>24</sup>. Reconstructed MAGs  
127 comprise taxonomically diverse members from a total of six archaeal and 15 bacterial phyla  
128 (Figure 2 and Table S4). Within the domain Bacteria, members of the phylum *Chloroflexi* are  
129 highly represented in each sample, especially from the classes *Dehalococcoidia* and  
130 *Anaerolineae*. Within the domain Archaea, members of phylum *Bathyarchaeota* were recovered  
131 from all three sites. Most other MAGs belong to poorly understood candidate phyla that lack  
132 cultured representatives, including *Aminicenantes* (formerly OP8), *Aerophobetes* (formerly  
133 CD12), *Cloacimonas* (formerly WWE1), *Stahlbacteria* (formerly WOR-3), *Atribacteria*  
134 (formerly JS1 and OP9), TA06 and the Asgard superphylum including *Lokiarchaeota*,  
135 *Thorarchaeota*, and *Heimdallarchaeota*.

136 Among those phyla, candidate phylum TA06 is the only one not yet given provisional names.  
137 Also known as GN04 or AC1, it was originally discovered in a hypersaline microbial mat<sup>25</sup>.  
138 First genomic representatives of this phylum were recovered from estuarine sediments<sup>26</sup> with a  
139 small number of other MAGs recently reported to belong to this lineage<sup>27, 28</sup>. Due to the paucity  
140 of available MAGs and misclassifications based on 16S rRNA gene sequences, members of  
141 TA06 are often ‘confused’ with members of the phylum WOR-3 (*Stahlbacteria*)<sup>28</sup>. In addition to  
142 the phylogenetic inference here based on 43 concatenated protein marker genes (Figure 2), the  
143 placement of two bins within the original TA06 phylum is further supported by genome

144 classification based on concatenation of 120 ubiquitous, single-copy marker genes<sup>29</sup> as well as  
145 classification of 16S rRNA genes using the SILVA database<sup>30</sup> (Tables S4 and S5).

146 In summary, while there are considerable community-level differences between the three sample  
147 locations, the recovered MAGs share common taxonomic affiliations at the phylum and class  
148 levels. Guided by sediment geochemistry (Table 1), we subsequently analyzed the metabolic  
149 potential of these MAGs to understand how bacterial and archaeal community members generate  
150 energy and biomass in these natural petroleum-associated deep-sea environments. Hidden  
151 Markov models (HMMs) and homology-based models were used to search for the presence of  
152 different metabolic genes in both the recovered MAGs and unbinned metagenomes. Where  
153 appropriate, findings were further validated through metabolomic analyses, phylogenetic  
154 visualization, and analysis of gene context.

### 155 **Capacity for detrital biomass and hydrocarbon degradation in sediment microbial** 156 **communities**

157 In deep-sea marine sediments organic carbon is supplied either as detrital matter from the  
158 overlying water column or as aliphatic and aromatic petroleum compounds that migrate upwards  
159 from underlying petroleum-bearing sediments<sup>11</sup>. With respect to detrital matter, genes involved  
160 in carbon acquisition and breakdown were prevalent across both archaeal and bacterial MAGs.  
161 These include genes encoding intracellular and extracellular carbohydrate-active enzymes and  
162 peptidases, as well as relevant transporters and glycolysis enzymes (Figure 3 and Table S6). The  
163 importance of these carbon acquisition mechanisms is supported by the detection of  
164 corresponding intermediate metabolites, such as glucose and amino acids, in all three sediments  
165 (Table S1). The ability to break down fatty acids and other organic acids via the beta-oxidation



166 pathway was identified in 13 MAGs, including members of *Chloroflexi*, *Deltaproteobacteria*,  
167 *Aerophobetes* and *Lokiarchaeota* (Figure 3 and Table S6). These results align with many other  
168 studies suggesting that the majority of seabed microorganisms are involved in recycling of  
169 residual organic matter, including complex carbohydrates, proteins and lipids<sup>13, 31, 32</sup>.

170 Unlike in other studies, the presence of petroleum hydrocarbons is a defining feature of the  
171 sediments investigated here and thus a key goal of this study was to identify the potential for  
172 microbial degradation of hydrocarbons as a source of energy and carbon. To this end, we focused  
173 on functional marker genes encoding enzymes that catalyze the activation of mechanistically  
174 sophisticated C-H bonds, to initiate hydrocarbon biodegradation<sup>33</sup>. For anaerobic hydrocarbon  
175 degradation, four oxygen-independent C-H activation reactions have been characterized: (1)  
176 addition of  $\square$  fumarate by glycyl-radical enzymes, *e.g.* for activation of alkylbenzenes and  
177 straight chain alkanes<sup>34</sup>; (2) hydroxylation with water by molybdenum cofactor-containing  
178 enzymes, *e.g.* for activation of ethylbenzene<sup>33</sup>; (3) carboxylation catalyzed by UbiD-like  
179 carboxylases, *e.g.* for activation of benzene and naphthalene<sup>35</sup>; and (4) reverse methanogenesis  
180 involving variants of methyl-coenzyme  $\square$  M reductase, *e.g.* for activation of methane and butane  
181<sup>36</sup>. Most of the evidence for mechanisms (1) – (3) has come from studies of hydrocarbon  
182 contaminated aquifers, whereas mechanism (4) has been studied extensively in marine sediments  
183<sup>23, 37</sup>.

184 Evidence for glycyl-radical enzymes that catalyze fumarate addition was found in 15 out of the  
185 82 MAGs based on identifying genes encoding alkylsuccinate synthase (AssA) (Figures 3 and  
186 4a). The *assA* sequences identified, while phylogenetically distant from canonical fumarate-  
187 adding enzymes and pyruvate formate lyases (Pfl), form a common clade with Pfl-like AssA

188 from *Archaeoglobus fulgidus* VC-16 and *Abyssivirga alkaniphila* L81 (Figure 4a). Both of these  
189 organisms have been shown experimentally to be capable of anaerobic alkane degradation<sup>38, 39</sup>.  
190 The putative *assA* genes identified here are present in all three samples regardless of  
191 hydrocarbon concentrations. They belong to MAGs affiliated with the bacterial phyla  
192 *Aerophobetes*, *Aminicenantes* and *Chloroflexi* as well as the archaeal phyla *Bathyarchaeota*,  
193 *Lokiarchaeota* and *Thorarchaeota*. The highest relative abundance of putative *assA* sequences  
194 was found in Site E29 as indicated by quality-filtered reads, which is consistent with this  
195 sediment containing the highest concentration of aliphatic compounds (Tables 1 and S7).  
196 Additional searching for other genes encoding fumarate-adding enzymes in the quality-filtered  
197 reads (e.g. *bssA*, *nmsA*, and canonical *assA*) did not return significant counts (Figure 4 and Table  
198 S7). Among the other three anaerobic hydrocarbon biodegradation mechanisms mentioned above,  
199 a MAG classified as *Dehalococcoidia* (*Chloroflexi* E29\_bin2) contained genes encoding putative  
200 catalytic subunits of *p*-cymene dehydrogenase (Cmd) and alkane C<sub>2</sub>-methylene hydroxylase  
201 (Ahy) (Figures 3 and S2), known to support *p*-cymene and alkane utilization<sup>37</sup>. Genes encoding  
202 enzymes catalyzing hydrocarbon carboxylation, reverse methanogenesis and aerobic  
203 hydrocarbon degradation (e.g. *alkB*, *nahC* and *nahG*) were not detected (Table S6). The latter  
204 result is expected due to the low concentrations of oxygen in the top 20 cm of organic rich  
205 seabed sediments<sup>11</sup>.

206 Considering the degradation of aromatic hydrocarbons, genes responsible for reduction of  
207 benzoyl-CoA were detected in 12 MAGs (Figures 3 and 4b). Benzoyl-CoA is a universal  
208 biomarker for anaerobic degradation of monoaromatic compounds as it is a common  
209 intermediate to biochemical pathways catalyzing this process<sup>40</sup>. Benzoyl-CoA reduction to  
210 cyclohex-1,5-diene-1-carboxyl-CoA is performed by Class I ATP-dependent benzoyl-CoA

211 reductase (BCR; BcrABCD) in facultative anaerobes (*e.g. Thauera aromatica*) or Class II ATP-  
212 independent reductase (Bam; BamBCDEFGHI) in strict anaerobes like sulfate reducers<sup>41</sup>. The  
213 *bcr* genes detected are all Class I, and were found in bacterial MAGs (*i.e.*, *Dehalococcoidia*,  
214 *Anaerolineae*, *Deltaproteobacteria*, *Aminicenantes* and TA06) and archaeal MAGs (*i.e.*,  
215 *Thermoplasmata* and *Bathyarchaeota*) (Figures 3 and 4b). Genes for further transformation of  
216 dienoyl-CoA to 3-hydroxypimelyl-CoA were also identified (Figures 3 and 4b), *i.e.*, those  
217 encoding 6-oxo-cyclohex-1-ene-carbonyl-CoA hydrolase (Oah), cyclohex-1,5-dienecarbonyl-CoA  
218 hydratase (Dch) and 6-hydroxycyclohex-1-ene-1-carbonyl-CoA dehydrogenases (Had)<sup>42</sup>.  
219 Together with the detection of 23 – 162 nM benzoate in these sediments (Table 1) these results  
220 strongly suggest that the organisms represented by these MAGs mediate the typical downstream  
221 degradation of aromatic compounds through the central benzoyl-CoA Bcr-Dch-Had-Oah  
222 pathway. However, the upstream pathways resulting in benzoate production from degradation of  
223 complex aromatic compounds were not resolved based on current data.

## 224 **Widespread capacity for fermentative production and respiratory consumption of acetate** 225 **and hydrogen**

226 Analysis of MAGs from these deep-sea hydrocarbon-associated sediments suggests that  
227 fermentation, rather than respiration, is the primary mode of organic carbon turnover in these  
228 environments. Most recovered MAGs with capacity for heterotrophic carbon degradation lacked  
229 respiratory primary dehydrogenases and terminal reductases, with exceptions being several  
230 *Proteobacteria* and one *Chloroflexi* (Table S6). In contrast, 6 and 14 MAGs contained genes  
231 indicating the capability for fermentative production of ethanol and lactate, whereas some 69  
232 MAGs contained genes for fermentative acetate production (Figure 3 and Table S6). These

233 findings are consistent with other studies emphasizing the importance of fermentation, including  
234 acetate production, in deep-sea sediments<sup>12, 43</sup>.

235 Acetate can also be produced by acetogenic CO<sub>2</sub> reduction through the Wood-Ljungdahl  
236 pathway using a range of substrates, including heterotrophic compounds<sup>15</sup>. Partial or complete  
237 sets of genes for the Wood-Ljungdahl pathway were found in 50 MAGs (Figures 3 and S3),  
238 including those affiliated with phyla previously inferred to mediate acetogenesis in deep-sea  
239 sediments through either the tetrahydrofolate-dependent bacterial pathway (*e.g. Chloroflexi* and  
240 *Aerophobetes*)<sup>7, 44</sup> or the tetrahydromethanopterin-dependent archaeal variant (*e.g.*  
241 *Bathyarchaeota* and Asgard group)<sup>45, 46</sup>. In addition, the signature diagnostic gene for the Wood-  
242 Ljungdahl pathway (*acsB*; acetyl-CoA synthase) is in high relative abundance in the quality-  
243 filtered metagenome reads at all three sites (Table S7). These observations are in agreement with  
244 mounting evidence that homoacetogens play a quantitatively important role in organic carbon  
245 cycling in the marine deep biosphere<sup>45, 47, 48</sup>.

246 Evidence for H<sub>2</sub> metabolism was also found in MAGs from all three sites. We screened putative  
247 hydrogenase genes from various subgroups in MAGs as well as unbinned metagenomic  
248 sequences (Figures 1, 3 and Tables S6, S7). Surprisingly few H<sub>2</sub> evolving-only hydrogenases  
249 were detected, with only five Group A [FeFe]-hydrogenases and five Group 4 [NiFe]-  
250 hydrogenases detected across the bacterial and archaeal MAGs. Instead, the most abundant  
251 hydrogenases within the MAGs and quality-filtered unassembled reads were the Group 3b, 3c,  
252 and 3d [NiFe]-hydrogenases. Group 3b and 3d hydrogenases are physiologically reversible, but  
253 generally support fermentation in anoxic environments by coupling NAD(P)H reoxidation to  
254 fermentative H<sub>2</sub> evolution<sup>49-51</sup>. Group 3c hydrogenases mediate a central step in

255 hydrogenotrophic methanogenesis, bifurcating electrons from H<sub>2</sub> to heterodisulfides and  
256 ferredoxin<sup>52</sup>; their functional role in Bacteria and non-methanogenic Archaea remains  
257 unresolved<sup>51</sup> yet their corresponding genes co-occur with heterodisulfide reductases across  
258 multiple archaeal and bacterial MAGs (Figure 3). Various Group 1 [NiFe]-hydrogenases were  
259 also detected, which are known to support hydrogenotrophic respiration in conjunction with a  
260 wide range of terminal reductases. This is consistent with previous studies in the Gulf of Mexico  
261 that experimentally measured the potential for hydrogen oxidation catalyzed by hydrogenase  
262 enzymes<sup>53</sup>.

263 Given the genomic evidence for hydrogen and acetate production in these sediments, we  
264 investigated whether any of the MAGs encoded terminal reductases to respire using these  
265 compounds as electron donors. In agreement with the high sulfate concentrations (Table 1), the  
266 key genes for dissimilatory sulfate reduction (*dsrAB*) were widespread across the metagenome  
267 reads, particularly at Site E29 (Table S7). These genes were recovered from MAGs affiliated  
268 with *Deltaproteobacteria* and *Dehalococcoidia* (Table S6). We also identified 31 novel reductive  
269 dehalogenase (*rdhA*) genes across 22 MAGs, mainly from *Aminicenantes* and *Bathyarchaeota*  
270 (Figure 3 and Table S6), suggesting that organohalides – that can be produced through abiotic  
271 and biotic processes in marine ecosystems<sup>54</sup> – may be electron acceptors in these deep-sea  
272 sediments. All MAGs corresponding to putative sulfate reducers and dehalorespirers encoded the  
273 capacity to completely oxidize acetate and other organic acids to CO<sub>2</sub> using either the reverse  
274 Wood-Ljungdahl pathway or TCA cycle (Figure 3 and Table S6). Several of these MAGs also  
275 harbored the capacity for hydrogenotrophic dehalorespiration *via* Group 1a and 1b [NiFe]-  
276 hydrogenases (Figure 3). In addition to these dominant uptake pathways, one MAG belonging to  
277 the epsilonproteobacterial genus *Sulfurovum* (E29\_bin29) included genes for the enzymes

278 needed to oxidize either H<sub>2</sub> (group 1b [NiFe]-hydrogenase), elemental sulfur (SoxABXYZ), and  
279 sulfide (Sqr), using nitrate as an electron acceptor (NapAGH); this MAG also has a complete set  
280 of genes for autotrophic CO<sub>2</sub> fixation *via* the reductive TCA cycle (Figure 3 and Table S6). ). In  
281 contrast, the capacity for methanogenesis appears to be relatively low and none of the MAGs  
282 contained *mcrA* genes. The genes for methanogenesis were detected in quality-filtered  
283 unassembled reads in all three sediments (Figures 1d and S4) and were mainly affiliated with  
284 acetoclastic methanogens at Site E29, and hydrogenotrophic methanogens at the other two sites  
285 (Figures 1d and S4). Overall, the collectively weak *mcrA* signal in the metagenomes suggests  
286 that the high levels of biogenic methane detected by geochemical analysis (Table 1) is primarily  
287 due to methanogenesis in sediment layers deeper than the top 20 cm.

## 288 **Thermodynamic modelling of hydrocarbon degradation**

289 Both the geochemistry data and biomarker gene survey suggest that hydrocarbon degradation  
290 occurs in the three deep-sea sediments sampled (Tables 1 and S1). Recreating the environmental  
291 conditions for cultivating the organisms represented by the retrieved MAGs is a challenging  
292 process, preventing further validation of the hydrocarbon degradation capabilities (and other  
293 metabolisms) among the majority of the lineages represented by the MAGs retrieved here<sup>48</sup>.  
294 Instead, we provide theoretical evidence that hydrocarbon degradation is feasible in this  
295 environment by modelling whether these processes are thermodynamically favorable in the  
296 conditions typical of deep sea sediments, namely high pressure and low temperature.

297 As concluded from the genome analysis and supported by metabolomics (Table 1), it is likely  
298 that most hydrocarbon oxidation occurs through fermentation rather than respiration. Taking  
299 hydrogen production and the Wood-Ljungdahl pathway into consideration (Figures 3 and 4), we

300 compared the thermodynamic constraints on hydrocarbon biodegradation for two plausible  
301 scenarios: (1) fermentation with production of hydrogen and acetate, and (2) fermentation with  
302 production of acetate alone. Hexadecane and benzoate are used as representative aliphatic and  
303 aromatic compounds, respectively, based on the geochemistry results (e.g. C<sub>2+</sub> alkane detection)  
304 and genomic analysis (e.g. *bcr* genes)<sup>47, 55</sup>. The calculated results show that the threshold  
305 concentrations of acetate that result in favorable energetics ( $\Delta G' < 0 \text{ kJ mol}^{-1}$ ) for fermentative  
306 co-generation of acetate and hydrogen require acetate to be extremely low in a hexadecane  
307 degradation scenario ( $< 10^{-12}$  mM acetate) and acetate to be at moderate levels in a benzoate  
308 degradation scenario ( $< 3.8$  mM acetate) (Figure 5). By contrast, for fermentation leading to  
309 production of only acetate, its concentration can be as high as 470 mM in a benzoate degradation  
310 scenario and as high as 300 mM in a hexadecane degradation scenario (Figure 5). Fermentative  
311 degradation of hexadecane to hydrogen and acetate in the deep seabed could therefore be less  
312 favorable than acetate production alone via the Wood-Ljungdahl pathway. Thus, if microbial  
313 communities consume hexadecane or more complex hydrocarbons as carbon and energy sources,  
314 it is likely that they employ the Wood-Ljungdahl pathway to produce acetate. However, other  
315 reactions such as fermentation to H<sub>2</sub> still cannot be excluded, e.g., for less complex hydrocarbons  
316 such as benzoate and related compounds.

## 317 **Discussion**

318 In this study, metagenomics revealed that most of the Bacteria and Archaea in the deep-sea  
319 sediment microbial communities sampled belong to candidate phyla that lack cultured  
320 representatives and sequenced genomes (Figures 1 and 2). As a consequence, it is challenging to  
321 link phylogenetic patterns with the microbial functional traits underpinning the biogeochemistry

322 of deep seabed habitats. Here, we were able to address this by combining *de novo* assembly and  
323 binning of metagenomic data with geochemical and metabolomic analyses, and complementing  
324 our observations with thermodynamic modeling. Pathway reconstruction from 82 MAGs  
325 recovered from the three deep-sea near surface sediments revealed that many community  
326 members were capable of anaerobic hydrocarbon degradation as well as acquiring and  
327 hydrolyzing residual organic matter (Figure 3), whether supplied as detritus from the overlying  
328 water column or as autochthonously produced necromass (Figure 6). Heterotrophic fermenters  
329 and acetogens were in considerably higher relative abundance than heterotrophic respirers,  
330 despite the abundance of sulfate in the sediments (Table 1). For example, while genomic  
331 coverage of putative sulfate reducers is relatively low (< 1% of the communities), the most  
332 abundant MAG at each site were all putative acetogenic heterotrophs, *i.e.* *Dehalococcoidia*  
333 E26\_bin16, *Actinobacteria* E44\_bin5, and *Aminicenantes* E29\_bin47 for Sites E26, E44 and E29  
334 respectively (~3.3-4.5% relative abundance, Table S4). Therefore, in contrast with coastal  
335 sediments<sup>56</sup>, microbial communities in the deep seabed are likely influenced by the capacity to  
336 utilize available electron donors more so than by the availability of oxidants.

337 In this context, multiple lines of evidence indicate degradation of aliphatic or aromatic petroleum  
338 compounds as carbon and energy sources for anaerobic populations in these deep-sea  
339 hydrocarbon seep environments (Table 1, Figures 3 - 5). Whereas capacity for detrital organic  
340 matter degradation is a common feature in the genomes retrieved in this study, and from many  
341 other environments<sup>26</sup>, anaerobic hydrocarbon degradation is a more exclusive feature that was  
342 detected in 23 out of 82 MAGs. Evidence of anaerobic alkane oxidation via fumarate addition  
343 and hydroxylation pathways, as well as anaerobic aromatic compound degradation by the Class I  
344 benzoyl-CoA reductase pathway, was found in all three sediments. The ability to utilize



345 hydrocarbons may explain the ecological dominance (high relative abundance) of certain  
346 lineages of Bacteria and Archaea in these microbial communities (Figure 1a), as many of those  
347 phyla have previously been found to be associated with hydrocarbons in various settings. For  
348 example, *Aerophobetes* have been detected in other cold seep environments <sup>7</sup>, *Aminicenantes* are  
349 often found associated with fossil fuels <sup>27</sup>, and *Chloroflexi* harboring genes for anaerobic  
350 hydrocarbon degradation have been found in hydrothermal vent sediments <sup>4</sup>. While Archaea  
351 have been reported to mediate oxidation of methane and other short-chain alkanes in sediments <sup>5</sup>,  
352 <sup>36</sup>, few have been reported to anaerobically degrade larger hydrocarbons <sup>37</sup>. The finding of  
353 *Bathyarchaeota* and other archaeal phyla potentially capable of anaerobic hydrocarbon  
354 degradation extends the potential hydrocarbon substrate spectrum for Archaea. More broadly,  
355 these findings extend the breadth of bacterial and archaeal lineages that putatively degrade  
356 hydrocarbons. Current knowledge of anaerobic hydrocarbon degradation remains limited, with  
357 the majority of studies focused on environments subject to anthropogenic hydrocarbon  
358 contamination, most notably groundwater aquifers <sup>37</sup>. It is possible that microorganisms  
359 inhabiting deep-sea sediments harbor novel mechanisms for anaerobic hydrocarbon degradation  
360 that may be relevant for biotechnology and bioremediation in a variety of other settings, *e.g.*,  
361 other cold habitats. Future studies of genome-enabled hydrocarbon degradation using samples  
362 such as the sediments studied here may elucidate this further.

363 Genomic analyses of 12 MAGs harboring genes for central benzoyl-CoA pathway reveal that  
364 they are likely a mixture of obligate fermenters and sulfate reducers. The finding that these  
365 organisms use the ATP-consuming class I, not the reversible class II, benzoyl-CoA reductase is  
366 surprising. It is generally thought that strict anaerobes must use class II BCRs because the  
367 amount of energy available from benzoate oxidation during sulfate reduction or fermentation is

368 not sufficient to support the substantial energetic requirement of the ATP-dependent class I BCR  
369 reaction<sup>42</sup>. However, acetogenic fermentation of hydrocarbons may explain how the Class I  
370 reaction could be thermodynamically favorable, as shown in Figure 5. In agreement with this,  
371 there are reported exceptions to the general Class I vs Class II observations, such as the  
372 hyperthermophilic archaeon *Ferroglobus placidus* that couples benzoate degradation via the  
373 Class I system with iron reduction<sup>42</sup>, and fermentative deep-sea *Chloroflexi* strains DscP3 and  
374 Dsc4 that contain genes for class I benzoyl-CoA reductases<sup>44</sup>. Indeed, acetogens can utilize  
375 many different substrates and have relatively high ATP yields, as well as thermodynamic  
376 efficiencies toward heterotrophic substrates, which is consistent with the proposed importance of  
377 acetogens in energy-limited seafloor ecosystems<sup>45, 47</sup>.

378 Based on the evidence presented here, we propose that acetate and hydrogen are the central  
379 intermediates underpinning community interactions and biogeochemical cycling in these deep-  
380 sea sediments (Figure 6). Maintaining low acetate and hydrogen concentrations in the  
381 environment is important for promoting continuous fermentation of organic substrates, consistent  
382 with thermodynamic constraints (Figure 5). Acetate and hydrogen in sediment porewater were  
383 below detection limits, consistent with the high turnover rates of both compounds. This may  
384 correspond with the genomic potential within these microbial communities for the coupling of  
385 acetate consumption to sulfate reduction, organohalide respiration and acetoclastic  
386 methanogenesis, as suggested in other studies<sup>55, 57</sup>. Some community members also appear to be  
387 capable of H<sub>2</sub> consumption, including *via* putative heterodisulfide reductase-coupled  
388 hydrogenases. In turn, hydrogen oxidation can support autotrophic carbon fixation and therefore  
389 may provide a feedback loop for regeneration of organic carbon. Acetate- and hydrogen-

390 oxidizing community members are likely to promote upstream fermentative degradation of  
391 necromass and hydrocarbons (Figure 6).

392 Overall, this metagenome dataset extended the knowledge of metabolic potential of microbial  
393 communities inhabited in deep-sea sediments that receive an input of thermogenic hydrocarbon.  
394 They are mostly likely sustained through fermentation, acetogenesis and hydrogen metabolisms.  
395 More importantly, as supported by geochemical data, metabolomic analysis, and thermodynamic  
396 modelling, our findings expand the diversity of microbial lineages with the potential for  
397 anaerobic hydrocarbon degradation through *e.g.* the activity of glycol-radical enzymes. Together  
398 with the recent discovery of anaerobic butane degradation in gas-rich hydrothermally-heated  
399 sediments<sup>36</sup>, it can be inferred that anaerobic degradation of hydrocarbons heavier than methane  
400 might be more widespread than previously expected and may significantly contribute to energy  
401 and carbon budgets in dark deep-sea sediments<sup>58</sup>.

## 402 **Methods**

### 403 **Sampling and geochemical measurements**

404 The three marine sediment samples used in this study were collected from the near-surface (top  
405 20 cm) of the seafloor in the Eastern Gulf of Mexico as part of a piston coring survey, as  
406 described previously<sup>20</sup>. Samples for hydrocarbon characterization were sectioned on board the  
407 research vessel immediately following piston core retrieval, flushed with N<sub>2</sub> and sealed in  
408 hydrocarbon-free gas tight metal canisters then frozen until analysis. Interstitial gas analysis was  
409 later performed on the headspace in the canisters using GC with Flame Ionization Detector (GC-  
410 FID). Sediment samples for gas/liquid chromatography and stable isotope analysis were frozen,

411 freeze-dried and homogenized then extracted using accelerated solvent extraction (ACE 200).  
412 Extracts were subsequently analyzed using GC/FID, a Perkin-Elmer Model LS 50B fluorometer,  
413 GC/MS and Finnigan MAT 252 isotope mass spectrometry as detailed elsewhere<sup>59</sup>.

414 Sulfate and chloride concentrations were measured in a Dionex ICS-5000 reagent-free ion  
415 chromatography system (Thermo Scientific, CA, USA) equipped with an anion-exchange  
416 column (Dionex IonPac AS22; 4 × 250 mm; Thermo Scientific), an EGC-500 K<sub>2</sub>CO<sub>3</sub> eluent  
417 generator cartridge and a conductivity detector. Organic acids were analysed in the 0.2 μm  
418 filtered sediment porewater using a Thermo RS3000 HPLC fitted with an Ultimate 3000 UV  
419 detector. Separation was achieved over an Aminex HPX-87H organic acid column (Biorad, USA)  
420 under isocratic conditions (0.05 mM H<sub>2</sub>SO<sub>4</sub>) at 60°C with a run time of 20 minutes. Organic  
421 acids were compared to the retention time of known standards and the limit of detection for  
422 acetate was determined to be 2.5 μM.

423 For the analysis of metabolites, sediment was spun down, the supernatant collected, diluted 1:1  
424 in pure methanol, and filtered through 0.2 μm Teflon syringe filters. Extracts were separated  
425 using Ultra High-Performance Liquid Chromatography (UHPLC) equipped with a hydrophilic  
426 interaction liquid chromatography column (Synchronis HILIC, Thermo Fisher). A Thermo Fisher  
427 Scientific Q-Exactive HF mass spectrometer in negative-mode electrospray ionization was used  
428 to collect high-resolution full-scan MS data from 50-750 *m/z* at 240,000 resolution with an  
429 automatic gain control (AGC) target of 3e6 and a maximum injection time of 200 ms. In addition,  
430 benzoate ion (*m/z* 121.02943) was subjected to fragmentation using collision induced  
431 dissociation (CID) with a collision energy of 10eV at 120,000 resolution (*m/z* 121.02943 >  
432 77.03948). For CID experiments, an AGC target of 1e6 was used with a maximum injection time

433 of 100 ms. Metabolites were further identified using accurate mass and retention times of  
434 standards using Thermo Xcalibur software and MAVEN freeware. Larger compound lists were  
435 assigned identification using a combination of MAVEN and the KEGG database <sup>60</sup>.

#### 436 **DNA extraction and sequencing**

437 For the three sediment samples, DNA was extracted from 10 g of sediment using the PowerMax  
438 Soil DNA Isolation Kit (12988-10, QIAGEN) according to the manufacturer's protocol with  
439 minor modifications for the step of homogenization and cell lysis *i.e.*, cells were lysed in  
440 PowerMax Bead Solution tubes for 45 s at 5.5 m s<sup>-1</sup> using a Bead Ruptor 24 (OMNI  
441 International). DNA concentrations were assessed using a Qubit 2.0 fluorometer (Thermo Fisher  
442 Scientific, Canada). Metagenomic library preparation and DNA sequencing was conducted at the  
443 Center for Health Genomics and Informatics in the Cumming School of Medicine, University of  
444 Calgary. DNA fragment libraries were prepared by shearing genomic DNA using a Covaris  
445 sonicator and the NEBNext Ultra II DNA library preparation kit (New England BioLabs). DNA  
446 was sequenced on a ~40 Gb (*i.e.* 130 M reads) mid-output NextSeq 500 System (Illumina Inc.)  
447 300 cycle (2 × 150 bp) sequencing run.

448 To provide a high-resolution microbial community profile, the three samples were also subjected  
449 to 16S rRNA gene amplicon sequencing on a MiSeq benchtop sequencer (Illumina Inc.). DNA  
450 was extracted from separate aliquots of the same sediment samples using the DNeasy  
451 PowerLyzer PowerSoil kit (MO BIO Laboratories, a Qiagen Company, Carlsbad, CA, USA) and  
452 used as the template for different PCR reactions. The v3-4 region of the bacterial 16S rRNA  
453 gene and the v4-8 region of the archaeal 16S rRNA gene were amplified using the primer pairs  
454 SD-Bact-0341-bS17/SD-Bact-0785-aA21 and SD-Arch-0519-aS15/SD-Arch-0911-aA20,

455 respectively<sup>61</sup> as described previously<sup>20</sup> on a ~15 Gb 600-cyces (2 × 300 bp) sequencing run (for  
456 results see Figure S1).

### 457 **Metagenomic assembly and binning**

458 Raw reads were quality-controlled by (1) clipping off primers and adapters and (2) filtering out  
459 artifacts and low-quality reads as described previously<sup>62</sup>. Filtered reads were assembled using  
460 metaSPAdes version 3.11.0<sup>63</sup> and short contigs (<500 bp) were removed. Sequence coverage  
461 was determined by mapping filtered reads onto assembled contigs using BBmap version 36  
462 (<https://sourceforge.net/projects/bbmap/>). Binning of metagenome contigs was performed using  
463 MetaBAT version 2.12.1 (--minContig 1500)<sup>64</sup>. Contaminated contigs in the produced bins were  
464 further removed based on genomic properties (GC, tetranucleotide signatures, and coverage) and  
465 taxonomic assignments using RefineM version 0.0.22<sup>65</sup>. Resulting bins were further examined  
466 for contamination and completeness using CheckM version 1.0.8 with the lineage-specific  
467 workflow<sup>24</sup>.

### 468 **Annotation**

469 For MAGs, genes were called by Prodigal (-p meta)<sup>66</sup>. Metabolic pathways were predicted  
470 against the KEGG GENES database using the GhostKOALA tool<sup>67</sup> and against the Pfam,  
471 TIGRFam and custom HMM databases (<https://github.com/banfieldlab/metabolic-hmms>) using  
472 MetaErg (<https://sourceforge.net/projects/metaerg/>). The dbCAN web server was used for  
473 carbohydrate-active gene identification (cutoffs: coverage fraction: 0.40; e-value: 1e-18)<sup>68</sup>.  
474 Genes encoding proteases and peptidases were identified using BLASTp against the MEROPS  
475 database release 12.0 (cutoffs: e-value, 1e-20; sequence identity, 30%)<sup>69</sup>. Genes involved in

476 anaerobic hydrocarbon degradation were identified using BLASTp against a custom database  
477 (Table S8) (cutoffs: e-value, 1e-20; sequence identity, 30%). Hydrogenases were identified and  
478 classified using a web-based search using the hydrogenase classifier HydDB<sup>70</sup>.

479 Full-length 16S rRNA genes were reconstructed from metagenomic reads using phyloFlash  
480 version 3.1 (<https://hrgv.github.io/phyloFlash/>) together with the SILVA SSU 132 rRNA  
481 database<sup>30</sup>. Diversity calculations were based on separate 16S rRNA gene amplicon library  
482 results<sup>20</sup>. Functional and taxonomic McrA gpkgs were used to assess the diversity of  
483 methanogens against the metagenomic reads using GraftM with default parameters<sup>71</sup>. Genes  
484 encoding the catalytic subunits of hydrogenases, *dsrA*, *acsB*, *assA*, *nmsA* and *bssA* were retrieved  
485 from metagenomic reads through diamond BLASTx<sup>72</sup> queries against comprehensive custom  
486 databases<sup>46, 70, 73</sup> (cutoffs: e-value, 1e-10; sequence identity, 70%).

## 487 **Phylogenetic analyses**

488 For taxonomic classification of each MAG, two methods were used to produce genome trees that  
489 were then used to validate each other. In the first method the tree was constructed using  
490 concatenated proteins of up to 16 syntenic ribosomal protein genes following procedures  
491 reported elsewhere<sup>74</sup>; the second tree was constructed using concatenated amino acid sequences  
492 of up to 43 conserved single-copy genes following procedures described previously<sup>75</sup>. Both trees  
493 were calculated using FastTree version 2.1.9 (-lg -gamma)<sup>76</sup> and resulting phylogenies were  
494 congruent. Reference genomes for relatives were accessed from NCBI GenBank, including  
495 genomes selected from several recent studies representing the majority of candidate bacterial and  
496 archaeal phylogenetic groups<sup>4, 65, 77-80</sup>. The tree in Figure 2 was inferred based on concatenation  
497 of 43 conserved single-copy genes (Database S1). Specifically, it was built using RAxML

498 version 8<sup>81</sup> implemented by the CIPRES Science Gateway<sup>82</sup> and it was called as follows:  
499 raxmlHPC-HYBRID -f a -n result -s input -c 25 -N 100 -p 12345 -m PROTCATLG -x 12345.  
500 The phylogeny resulting from RAxML is consistent with the taxonomic classification of MAGs  
501 that resulted from FastTree. Interactive tree of life (iTOL) version 3<sup>83</sup> was used for tree  
502 visualization and modification.

503 For phylogenetic placements of functional genes, sequences were aligned using the MUSCLE  
504 algorithm<sup>84</sup> included in MEGA7<sup>85</sup>. All positions with less than 95% site coverage were  
505 eliminated. Maximum likelihood phylogenetic trees were constructed in MEGA7 using a general  
506 time reversible substitution model and uniform rates among sites. These trees were bootstrapped  
507 with 100 replicates.

508 Taxonomic classification of MAGs inferred to belong to candidate phylum TA06 after  
509 phylogenetic analyses were additionally confirmed by performing classify workflow using  
510 GTDB-Tk version 0.0.6+ (<https://github.com/Ecogenomics/GtdbTk>).

### 511 **Thermodynamic calculations**

512 The values of Gibbs free energy of formation for substances were taken from Madigan et al.<sup>86</sup>  
513 and Dolfing et al.<sup>55</sup>. The pH used in all calculations was 8.0 as reported in a previous  
514 thermodynamic study of deep marine sediments<sup>47</sup>, partial pressure was 300 atm based on water  
515 depths at the three sites (<http://docs.bluerobotics.com/calc/pressure-depth/>), and temperature was  
516 set as 4°C to represent deep sea conditions<sup>87</sup>. Calculations followed accepted protocols for  
517 determining reaction kinetics and thermodynamics<sup>88</sup>.



## 518 **Acknowledgements**

519 The work was supported by a Genome Canada Genomics Applied Partnership Program (GAPP)  
520 grant to CRJH. I.A.L is supported by an Alberta Innovates Translational Health Chair.  
521 Metabolomics data were acquired by R.A.G. at the Calgary Metabolomics Research Facility  
522 (CMRF), which is supported by the International Microbiome Centre and the Canada Foundation  
523 for Innovation (CFI-JELF 34986). We thank Xiaoli Dong and Marc Strous for establishing  
524 bioinformatics workflow and pipelines, the Centre for Health Genomics and Informatics at  
525 University of Calgary for NextSeq sequencing, Alexander Probst for providing the database of  
526 16 syntenic ribosomal proteins, and Nina Dombrowski and Brett Baker for providing a custom  
527 blast database for hydrocarbon degradation genes.

## 528 **Data availability**

529 DNA sequences (amplicon sequences, genomes and raw sequence reads) have been deposited in  
530 the NCBI BioProject database with accession number PRJNA415828 and PRJNASUB3936075  
531 (<https://www.ncbi.nlm.nih.gov/bioproject/>). The authors declare that all other data supporting the  
532 findings of this study are available within the article and its supplementary information files, or  
533 from the corresponding authors upon request.

534 **References**

- 535 1. Petro, C., Starnawski, P., Schramm, A. & Kjeldsen, K.U. Microbial community assembly  
536 in marine sediments. *Aquat Microb Ecol* **79**, 177-195 (2017).
- 537 2. Vigneron, A. et al. Comparative metagenomics of hydrocarbon and methane seeps of the  
538 Gulf of Mexico. *Sci Rep* **7**, 16015 (2017).
- 539 3. Marshall, I.P.G., Karst, S.M., Nielsen, P.H. & Jørgensen, B.B. Metagenomes from deep  
540 Baltic Sea sediments reveal how past and present environmental conditions determine  
541 microbial community composition. *Mar Genomics* **37**, 58-68 (2018).
- 542 4. Dombrowski, N., Seitz, K.W., Teske, A.P. & Baker, B.J. Genomic insights into potential  
543 interdependencies in microbial hydrocarbon and nutrient cycling in hydrothermal  
544 sediments. *Microbiome* **5**, 106 (2017).
- 545 5. Lloyd, K.G. et al. Predominant archaea in marine sediments degrade detrital proteins.  
546 *Nature* **496**, 215-218 (2013).
- 547 6. Orsi, W.D. Ecology and evolution of seafloor and subseafloor microbial communities.  
548 *Nat Rev Microbiol* (2018).
- 549 7. Wang, Y. et al. Draft genome of an *Aerophobetes* bacterium reveals a facultative lifestyle  
550 in deep-sea anaerobic sediments. *Sci Bull* **61**, 1176-1186 (2016).
- 551 8. Orcutt, B.N., Sylvan, J.B., Knab, N.J. & Edwards, K.J. Microbial ecology of the dark  
552 ocean above, at, and below the seafloor. *Microbiol Mol Biol Rev* **75**, 361-422 (2011).
- 553 9. Inagaki, F. et al. Exploring deep microbial life in coal-bearing sediment down to ~2.5 km  
554 below the ocean floor. *Science* **349**, 420-424 (2015).
- 555 10. Jørgensen, B.B. & Marshall, I.P. Slow microbial life in the seabed. *Ann Rev Mar Sci* **8**,  
556 311-332 (2016).
- 557 11. Jørgensen, B.B. & Boetius, A. Feast and famine--microbial life in the deep-sea bed. *Nat*  
558 *Rev Microbiol* **5**, 770-781 (2007).
- 559 12. Arndt, S. et al. Quantifying the degradation of organic matter in marine sediments: A  
560 review and synthesis. *Earth-Sci Rev* **123**, 53-86 (2013).
- 561 13. Orsi, W.D., Richards, T.A. & Francis, W.R. Predicted microbial secretomes and their  
562 target substrates in marine sediment. *Nat Microbiol* **3**, 32-37 (2018).

- 563 14. Brooks, J.M. et al. Deep-sea hydrocarbon seep communities: evidence for energy and  
564 nutritional carbon sources. *Science* **238**, 1138-1142 (1987).
- 565 15. Ijiri, A. et al. Deep-biosphere methane production stimulated by geofluids in the Nankai  
566 accretionary complex. *Sci Adv* **4**, eaao4631 (2018).
- 567 16. Ruff, S.E. et al. Global dispersion and local diversification of the methane seep  
568 microbiome. *Proc Natl Acad Sci U S A* **112**, 4015-4020 (2015).
- 569 17. Dong, X. et al. Fermentative Spirochaetes mediate necromass recycling in anoxic  
570 hydrocarbon-contaminated habitats. *ISME J* **12**, 2039-2050 (2018).
- 571 18. Lin, Y.-S. et al. Towards constraining H<sub>2</sub> concentration in subseafloor sediment: A  
572 proposal for combined analysis by two distinct approaches. *Geochim Cosmochim Acta* **77**,  
573 186-201 (2012).
- 574 19. Sauvage, J., Flinders, A., Spivack, A. & D'Hondt, S. Global distribution of radiolytic H<sub>2</sub>  
575 production in marine sediment and implications for subsurface life. *AGU Fall Meeting*  
576 *Abstracts* (2017).
- 577 20. Chakraborty, A. et al. Thermophilic endospores associated with migrated thermogenic  
578 hydrocarbons in deep Gulf of Mexico marine sediments. *ISME J* **12**, 1895-1906 (2018).
- 579 21. Whiticar, M.J. Carbon and hydrogen isotope systematics of bacterial formation and  
580 oxidation of methane. *Chem Geol* **161**, 291-314 (1999).
- 581 22. Killops, S.D. & Aljuboori, M.A.H.A. Characterization of the Unresolved Complex  
582 Mixture (UCM) in the gas chromatograms of biodegraded petroleums. *Org Geochem* **15**,  
583 147-160 (1990).
- 584 23. Gieg, L.M. & Toth, C.R.A. in *Anaerobic Utilization of Hydrocarbons, Oils, and Lipids*.  
585 (ed. M. Boll) 1-30 (Springer International Publishing, Cham; 2017).
- 586 24. Parks, D.H., Imelfort, M., Skennerton, C.T., Hugenholtz, P. & Tyson, G.W. CheckM:  
587 assessing the quality of microbial genomes recovered from isolates, single cells, and  
588 metagenomes. *Genome Res* **25**, 1043-1055 (2015).
- 589 25. Ley, R.E. et al. Unexpected diversity and complexity of the Guerrero Negro hypersaline  
590 microbial mat. *Appl Environ Microbiol* **72**, 3685-3695 (2006).
- 591 26. Baker, B.J., Lazar, C.S., Teske, A.P. & Dick, G.J. Genomic resolution of linkages in  
592 carbon, nitrogen, and sulfur cycling among widespread estuary sediment bacteria.  
593 *Microbiome* **3**, 14 (2015).

- 594 27. Hu, P. et al. Genome-resolved metagenomic analysis reveals roles for candidate phyla  
595 and other microbial community members in biogeochemical transformations in oil  
596 reservoirs. *MBio* **7**, e01669-01615 (2016).
- 597 28. Sieber, C.M.K. et al. Recovery of genomes from metagenomes via a dereplication,  
598 aggregation and scoring strategy. *Nat Microbiol* **3**, 836-843 (2018).
- 599 29. Parks, D.H. et al. A standardized bacterial taxonomy based on genome phylogeny  
600 substantially revises the tree of life. *Nat Biotechnol* (2018).
- 601 30. Quast, C. et al. The SILVA ribosomal RNA gene database project: improved data  
602 processing and web-based tools. *Nucleic Acids Res* **41**, D590-596 (2013).
- 603 31. Bradley, J.A., Amend, J.P. & LaRowe, D.E. Necromass as a limited source of energy for  
604 microorganisms in marine sediments. *J Geophys Res-Bioge* **123**, 577-590 (2018).
- 605 32. Lipp, J.S., Morono, Y., Inagaki, F. & Hinrichs, K.U. Significant contribution of Archaea  
606 to extant biomass in marine subsurface sediments. *Nature* **454**, 991-994 (2008).
- 607 33. Boll, M. & Heider, J. in *Handbook of Hydrocarbon and Lipid Microbiology*. (ed. K.N.  
608 Timmis) 1011-1024 (Springer Berlin Heidelberg, Berlin, Heidelberg; 2010).
- 609 34. Tan, B. et al. Comparative analysis of metagenomes from three methanogenic  
610 hydrocarbon-degrading enrichment cultures with 41 environmental samples. *ISME J* **9**,  
611 2028-2045 (2015).
- 612 35. Meckenstock, R.U. et al. Anaerobic degradation of benzene and polycyclic aromatic  
613 hydrocarbons. *J Mol Microbiol Biotechnol* **26**, 92-118 (2016).
- 614 36. Laso-Perez, R. et al. Thermophilic archaea activate butane via alkyl-coenzyme M  
615 formation. *Nature* **539**, 396-401 (2016).
- 616 37. Rabus, R. et al. Anaerobic Microbial Degradation of Hydrocarbons: From Enzymatic  
617 Reactions to the Environment. *J Mol Microbiol Biotechnol* **26**, 5-28 (2016).
- 618 38. Schouw, A. et al. *Abyssivirga alkaniphila* gen. nov., sp. nov., an alkane-degrading,  
619 anaerobic bacterium from a deep-sea hydrothermal vent system, and emended  
620 descriptions of *Natranaerovirga pectinivora* and *Natranaerovirga hydrolytica*. *Int J Syst*  
621 *Evol Microbiol* **66**, 1724-1734 (2016).
- 622 39. Khelifi, N. et al. Anaerobic oxidation of long-chain n-alkanes by the hyperthermophilic  
623 sulfate-reducing archaeon, *Archaeoglobus fulgidus*. *ISME J* **8**, 2153-2166 (2014).

- 624 40. Porter, A.W. & Young, L.Y. in *Advances in Applied Microbiology*, Vol. 88. (eds. S.  
625 Sariaslani & G.M. Gadd) 167-203 (Academic Press, 2014).
- 626 41. Dong, X. et al. Reconstructing metabolic pathways of a member of the genus  
627 *Pelotomaculum* suggesting its potential to oxidize benzene to carbon dioxide with direct  
628 reduction of sulfate. *FEMS Microbiol Ecol* **93**, fiw254-fiw254 (2017).
- 629 42. Holmes, D.E., Risso, C., Smith, J.A. & Lovley, D.R. Genome-scale analysis of anaerobic  
630 benzoate and phenol metabolism in the hyperthermophilic archaeon *Ferroglobus*  
631 *placidus*. *ISME J* **6**, 146-157 (2012).
- 632 43. Beulig, F., Røy, H., Glombitza, C. & Jørgensen, B.B. Control on rate and pathway of  
633 anaerobic organic carbon degradation in the seabed. *Proc Natl Acad Sci U S A* **115**, 367-  
634 372 (2018).
- 635 44. Sewell, H.L., Kaster, A.K. & Spormann, A.M. Homoacetogenesis in Deep-Sea  
636 *Chloroflexi*, as inferred by single-cell genomics, provides a link to reductive  
637 dehalogenation in terrestrial *Dehalococcoidetes*. *MBio* **8** (2017).
- 638 45. He, Y. et al. Genomic and enzymatic evidence for acetogenesis among multiple lineages  
639 of the archaeal phylum *Bathyarchaeota* widespread in marine sediments. *Nat Microbiol* **1**,  
640 16035 (2016).
- 641 46. Adam, P.S., Borrel, G. & Gribaldo, S. Evolutionary history of carbon monoxide  
642 dehydrogenase/acetyl-CoA synthase, one of the oldest enzymatic complexes. *Proc Natl*  
643 *Acad Sci U S A* **115**, E1166-E1173 (2018).
- 644 47. Lever, M.A. Acetogenesis in the energy-starved deep biosphere - a paradox? *Front*  
645 *Microbiol* **2**, 284 (2011).
- 646 48. Yu, T. et al. Growth of sedimentary *Bathyarchaeota* on lignin as an energy source. *Proc*  
647 *Natl Acad Sci U S A* **115**, 6022-6027 (2018).
- 648 49. Berney, M., Greening, C., Conrad, R., Jacobs, W.R., Jr. & Cook, G.M. An obligately  
649 aerobic soil bacterium activates fermentative hydrogen production to survive reductive  
650 stress during hypoxia. *Proc Natl Acad Sci U S A* **111**, 11479-11484 (2014).
- 651 50. Ma, K., Hao, Z. & Adams, M.W.W. Hydrogen production from pyruvate by enzymes  
652 purified from the hyperthermophilic archaeon, *Pyrococcus furiosus*: A key role for  
653 NADPH. *FEMS Microbiol Lett* **122**, 245-250 (1994).

- 654 51. Greening, C. et al. Genomic and metagenomic surveys of hydrogenase distribution  
655 indicate H<sub>2</sub> is a widely utilised energy source for microbial growth and survival. *ISME J*  
656 **10**, 761 (2015).
- 657 52. Wagner, T., Koch, J., Ermler, U. & Shima, S. Methanogenic heterodisulfide reductase  
658 (HdrABC-MvhAGD) uses two noncubane [4Fe-4S] clusters for reduction. *Science* **357**,  
659 699-703 (2017).
- 660 53. Adhikari, R.R. et al. Hydrogen utilization potential in subsurface sediments. *Front*  
661 *Microbiol* **7**, 8 (2016).
- 662 54. Kawai, M. et al. High frequency of phylogenetically diverse reductive dehalogenase-  
663 homologous genes in deep seafloor sedimentary metagenomes. *Front Microbiol* **5**, 80  
664 (2014).
- 665 55. Dolfing, J., Larter, S.R. & Head, I.M. Thermodynamic constraints on methanogenic  
666 crude oil biodegradation. *ISME J* **2**, 442-452 (2008).
- 667 56. Canfield, D.E., Thamdrup, B. & Hansen, J.W. The anaerobic degradation of organic  
668 matter in Danish coastal sediments: iron reduction, manganese reduction, and sulfate  
669 reduction. *Geochim Cosmochim Acta* **57**, 3867-3883 (1993).
- 670 57. Liu, Y.F. et al. Metabolic capability and in situ activity of microorganisms in an oil  
671 reservoir. *Microbiome* **6**, 5 (2018).
- 672 58. Colman, D.R., Poudel, S., Stamps, B.W., Boyd, E.S. & Spear, J.R. The deep, hot  
673 biosphere: Twenty-five years of retrospection. *Proc Natl Acad Sci U S A* **114**, 6895-6903  
674 (2017).
- 675 59. Bernard, B.B. et al. Surface geochemical exploration and heat flow surveys in fifteen (15)  
676 frontier Indonesian basins. *Thirty-Second Annual Convention & Exhibition May 2008*  
677 (2008).
- 678 60. Kanehisa, M., Sato, Y., Kawashima, M., Furumichi, M. & Tanabe, M. KEGG as a  
679 reference resource for gene and protein annotation. *Nucleic Acids Res* **44**, D457-462  
680 (2016).
- 681 61. Klindworth, A. et al. Evaluation of general 16S ribosomal RNA gene PCR primers for  
682 classical and next-generation sequencing-based diversity studies. *Nucleic Acids Research*  
683 **41**, e1-e1 (2013).

- 684 62. Kleiner, M. et al. Assessing species biomass contributions in microbial communities via  
685 metaproteomics. *Nat Commun* **8**, 1558 (2017).
- 686 63. Nurk, S., Meleshko, D., Korobeynikov, A. & Pevzner, P.A. metaSPAdes: a new versatile  
687 metagenomic assembler. *Genome Res* **27**, 824-834 (2017).
- 688 64. Kang, D.D., Froula, J., Egan, R. & Wang, Z. MetaBAT, an efficient tool for accurately  
689 reconstructing single genomes from complex microbial communities. *PeerJ* **3**, e1165  
690 (2015).
- 691 65. Parks, D.H. et al. Recovery of nearly 8,000 metagenome-assembled genomes  
692 substantially expands the tree of life. *Nat Microbiol* **2**, 1533-1542 (2017).
- 693 66. Hyatt, D. et al. Prodigal: prokaryotic gene recognition and translation initiation site  
694 identification. *BMC Bioinformatics* **11**, 119 (2010).
- 695 67. Lombard, V., Golaconda Ramulu, H., Drula, E., Coutinho, P.M. & Henrissat, B. The  
696 carbohydrate-active enzymes database (CAZy) in 2013. *Nucleic Acids Res* **42**, D490-495  
697 (2014).
- 698 68. Yin, Y. et al. dbCAN: a web resource for automated carbohydrate-active enzyme  
699 annotation. *Nucleic Acids Res* **40**, W445-451 (2012).
- 700 69. Rawlings, N.D. et al. The MEROPS database of proteolytic enzymes, their substrates and  
701 inhibitors in 2017 and a comparison with peptidases in the PANTHER database. *Nucleic  
702 Acids Res* **46**, D624-D632 (2018).
- 703 70. Søndergaard, D., Pedersen, C.N. & Greening, C. HydDB: A web tool for hydrogenase  
704 classification and analysis. *Sci Rep* **6**, 34212 (2016).
- 705 71. Boyd, J.A., Woodcroft, B.J. & Tyson, G.W. GraftM: a tool for scalable, phylogenetically  
706 informed classification of genes within metagenomes. *Nucleic Acids Res* **46**, e59 (2018).
- 707 72. Buchfink, B., Xie, C. & Huson, D.H. Fast and sensitive protein alignment using  
708 DIAMOND. *Nat Methods* **12**, 59 (2014).
- 709 73. Anantharaman, K. et al. Expanded diversity of microbial groups that shape the  
710 dissimilatory sulfur cycle. *ISME J* **12**, 1715-1728 (2018).
- 711 74. Tully, B.J., Sachdeva, R., Graham, E.D. & Heidelberg, J.F. 290 metagenome-assembled  
712 genomes from the Mediterranean Sea: a resource for marine microbiology. *PeerJ* **5**,  
713 e3558 (2017).



- 714 75. Kato, S. et al. Genome-enabled metabolic reconstruction of dominant chemosynthetic  
715 colonizers in deep-sea massive sulfide deposits. *Environ Microbiol* **20**, 862-877 (2018).
- 716 76. Price, M.N., Dehal, P.S. & Arkin, A.P. FastTree 2--approximately maximum-likelihood  
717 trees for large alignments. *PLoS One* **5**, e9490 (2010).
- 718 77. Anantharaman, K. et al. Thousands of microbial genomes shed light on interconnected  
719 biogeochemical processes in an aquifer system. *Nat Commun* **7**, 13219 (2016).
- 720 78. Zaremba-Niedzwiedzka, K. et al. Asgard archaea illuminate the origin of eukaryotic  
721 cellular complexity. *Nature* **541**, 353-358 (2017).
- 722 79. Probst, A.J. et al. Differential depth distribution of microbial function and putative  
723 symbionts through sediment-hosted aquifers in the deep terrestrial subsurface. *Nat*  
724 *Microbiol* **3**, 328-336 (2018).
- 725 80. Hug, L.A. et al. A new view of the tree of life. *Nat Microbiol* **1**, 16048 (2016).
- 726 81. Stamatakis, A. RAxML version 8: a tool for phylogenetic analysis and post-analysis of  
727 large phylogenies. *Bioinformatics* **30**, 1312-1313 (2014).
- 728 82. Miller, M.A., Pfeiffer, W. & Schwartz, T. Creating the CIPRES Science Gateway for  
729 inference of large phylogenetic trees. *2010 Gateway Computing Environments Workshop*  
730 *(GCE)*, 1-8 (2010).
- 731 83. Letunic, I. & Bork, P. Interactive tree of life (iTOL) v3: an online tool for the display and  
732 annotation of phylogenetic and other trees. *Nucleic Acids Res* **44**, W242-245 (2016).
- 733 84. Edgar, R.C. MUSCLE: multiple sequence alignment with high accuracy and high  
734 throughput. *Nucleic Acids Res* **32**, 1792-1797 (2004).
- 735 85. Kumar, S., Stecher, G. & Tamura, K. MEGA7: Molecular Evolutionary Genetics  
736 Analysis Version 7.0 for Bigger Datasets. *Mol Biol Evol* **33**, 1870-1874 (2016).
- 737 86. Madigan, M.T., Martinko, J.M. & Parker, J. Brock biology of microorganisms, Vol. 13.  
738 (Pearson, 2017).
- 739 87. Xu, W.Y., Lowell, R.P. & Peltzer, E.T. Effect of seafloor temperature and pressure  
740 variations on methane flux from a gas hydrate layer: Comparison between current and  
741 late Paleocene climate conditions. *J Geophys Res-Sol Ea* **106**, 26413-26423 (2001).
- 742 88. Dolfing, J. in *Hydrocarbon and Lipid Microbiology Protocols*. (eds. T.J. McGenity, K.N.  
743 Timmis & B. Nogales Fernández) 155-163 (Springer Berlin Heidelberg, Berlin,  
744 Heidelberg; 2015).



745 **Tables and Figures**

746 **Table 1 Geochemical description of sediment samples from Sites E26, E29 and E44. TSF**

747 Max: total scanning fluorescence maximum intensity. UCM: uncharacterized complex mixture.

748  $\Sigma$ n-Alk: sum of C<sub>15</sub>-C<sub>34</sub> n-alkanes.  $\Sigma$ Alk Gas: total alkane gases. C<sub>2+</sub> Alk: sum of alkane gases

749 larger than methane. T/D: thermogenic/diagenetic n-alkane ratio. BDL: below detection limit.

750 NA: not analyzed.

| <i>Core ID</i>                                        | <i>Site<br/>E26</i> | <i>Site<br/>E29</i> | <i>Site<br/>E44</i> |
|-------------------------------------------------------|---------------------|---------------------|---------------------|
| <i>Latitude (N)</i>                                   | 26.59               | 27.43               | 26.28               |
| <i>Longitude (W)</i>                                  | 87.51               | 86.01               | 86.81               |
| <i>Water depth (km)</i>                               | 2.8                 | 3.2                 | 3.0                 |
| <i>Sulfate (mM)</i>                                   | 20.01               | 33.73               | 31.72               |
| <i>Benzoate (nM)</i>                                  | 93.6                | 22.6                | 161.7               |
| <i>Succinate (nM)</i>                                 | 11.7                | 5.0                 | 16.6                |
| <i>Acetate (μM)</i>                                   | BDL                 | BDL                 | BDL                 |
| <i>Chloride (g L<sup>-1</sup>)</i>                    | 21.04               | 20.15               | 21.05               |
| <i>Total Scanning Fluorescence MAX</i>                | 57326.7             | 26738.3             | 13502.3             |
| <i>Unresolved Complex Mixture (μg g<sup>-1</sup>)</i> | 32                  | 13                  | 7.3                 |
| <i>Σn-Alkanes (ng g<sup>-1</sup>)</i>                 | 2845.3              | 2527                | 1045                |
| <i>Thermogenic/Diagenetic Ratio</i>                   | 1.0                 | 2.6                 | 0.8                 |
| <i>ΣAlkane Gas (ppm)</i>                              | 9                   | 36012               | 9.9                 |
| <i>C<sub>2+</sub> Alkanes (ppm)</i>                   | 0.3                 | 17.5                | 0.5                 |
| <i>C<sub>1</sub>/(C<sub>2</sub>+C<sub>3</sub>)</i>    | NA                  | 3974.2              | NA                  |
| <i>δ<sup>13</sup>CH<sub>4</sub> (‰, vs. PDB)</i>      | NA                  | -85.1               | NA                  |
| <i>H<sub>2</sub> (ppm)</i>                            | BDL                 | BDL                 | BDL                 |

751 **Figure 1 Relative frequency of metagenomic sequence reads for different marker genes at**  
752 **Sites E26, E29 and E44.** (a) Community composition based on reconstruction of full-length 16S  
753 rRNA genes from the metagenomes. Eukaryotes and unassigned reads are not shown. (b)  
754 Relative occurrences of hydrogenases with different metal cofactors. (c) Relative occurrences of  
755 different subtypes of NiFe hydrogenases. (d) Relative occurrences of *mcrA* genes indicative of  
756 different types of methanogenesis.

757 **Figure 2 Phylogenetic placement of 82 reconstructed metagenome-assembled genomes.** A  
758 maximum-likelihood phylogenomic tree was built based on concatenated amino acid sequences  
759 of 43 conserved single copy genes using RAxML with the PROTGAMMALG model. Sequences  
760 of *Altiarchaeales* ex4484\_43 were used as an outgroup. The scale bar represents 1 amino acid  
761 substitution per sequence position. Bootstrap values > 70% are indicated. Blue for Site E26  
762 (E26\_binX), red for Site E29 (E29\_binY), and green for Site E44 (E44\_binZ).

763 **Figure 3 Identification of functional genes or pathways present in MAGs.** The presence of  
764 genes or pathways are indicated by orange shaded boxes. Gene names: Aor, aldehyde:ferredoxin  
765 oxidoreductase; Kor, 2-oxoglutarate/2-oxoacid ferredoxin oxidoreductase; Por,  
766 pyruvate:ferredoxin oxidoreductase; Ior, indolepyruvate ferredoxin oxidoreductase; GHs,  
767 glycoside hydrolases; AssA, catalytic subunit of alkylsuccinate synthase. CmdA, catalytic  
768 subunit of p-cymene dehydrogenase; AhyA, catalytic subunit of alkane C2-methylene  
769 hydroxylase; H<sub>2</sub>ase, hydrogenase; DsrAB, dissimilatory sulfite reductase. Pathways were  
770 indicated as being present if at least five genes in the Embden-Meyerhof-Parnas pathway, three  
771 genes in the beta-oxidation pathway, four genes in the Wood-Ljungdahl pathway, and six genes  
772 in the TCA cycle were detected. Additional details for the central benzoyl-CoA degradation

773 pathway can be found in Figure 4. Lactate and ethanol fermentation are indicated if genes  
774 encoding respective dehydrogenases were detected. More details about these functional genes  
775 and pathways can be found in the text and in Table S6.

776 **Figure 4 Evidence for anaerobic hydrocarbon degradation in MAGs.** (a) Phylogenetic  
777 relationship of identified genes in MAGs with currently known alkyl-arylalkylsuccinate  
778 synthases based on the respective catalytic alpha-subunits. Gene names: Ass/Mas, n-alkanes (1-  
779 methylalkyl) succinate synthase; Nms, 2-naphthylmethyl succinate synthase; Bss, benzyl  
780 succinate synthase; Ibs, 4-isopropylbenzyl succinate synthase; Hbs, 4-hydroxybenzyl succinate  
781 synthase. Sequences of pyruvate formate lyase (Pfl) from *E. coli* were used as an outgroup. The  
782 scale bar represents 0.1 amino acid substitutions per sequence position. Bootstrap values > 70%  
783 are indicated. The full sequences can be found in Text S1. (b) Summary of identified enzymes  
784 involved in central benzoyl-CoA processing in anaerobic aromatic hydrocarbon biodegradation.  
785 The MAGs were shown only if it was at least partially complete (presence of at least three  
786 subunits within one cluster for BcrABCD). Presence of genes or pathways are indicated by green  
787 boxes. Gene names: Bcr, benzoyl-CoA reductase; Oah, 6-oxo-cyclohex-1-ene-carbonyl-CoA  
788 hydrolase; Dch, cyclohex-1,5-dienecarbonyl-CoA hydratase; Had, 6-hydroxycyclohex-1-ene-1-  
789 carbonyl-CoA dehydrogenases.

790 **Figure 5 Thermodynamic constraints on anaerobic benzoate and hexadecane degradation**  
791 **in deep sea sediments.** Two possible scenarios are illustrated depending on the end products  
792 based on metabolic predictions in Figure 3: (1) fermentation with production of hydrogen and  
793 acetate, and (2) fermentation with production of acetate alone. Thermodynamics for each  
794 reaction are indicated by a line in its corresponding color. If  $\Delta G' < 0$ , the reaction is energetically

795 favorable (yellow-shaded area), and if  $\Delta G' > 0$  the reaction is assumed not to occur. The graph  
796 shows that  $\Delta G'$  for hexadecane fermentation to acetate alone (green reaction) will not reach  
797 negative values unless the concentration for acetate is extremely low (far lower than the  
798 detection limit for acetate of 2.5  $\mu\text{M}$  in this study, see dash line) such that the other three  
799 reactions are more realistic scenarios for anaerobic hydrocarbon degradation in the marine  
800 sediments studied here.

801 **Figure 6 Common potential organotrophic and hydrogenotrophic pathways in three**  
802 **hydrocarbon-impacted microbial communities as inferred from metagenomics and**  
803 **metabolomics.**

804 **Figure 1**

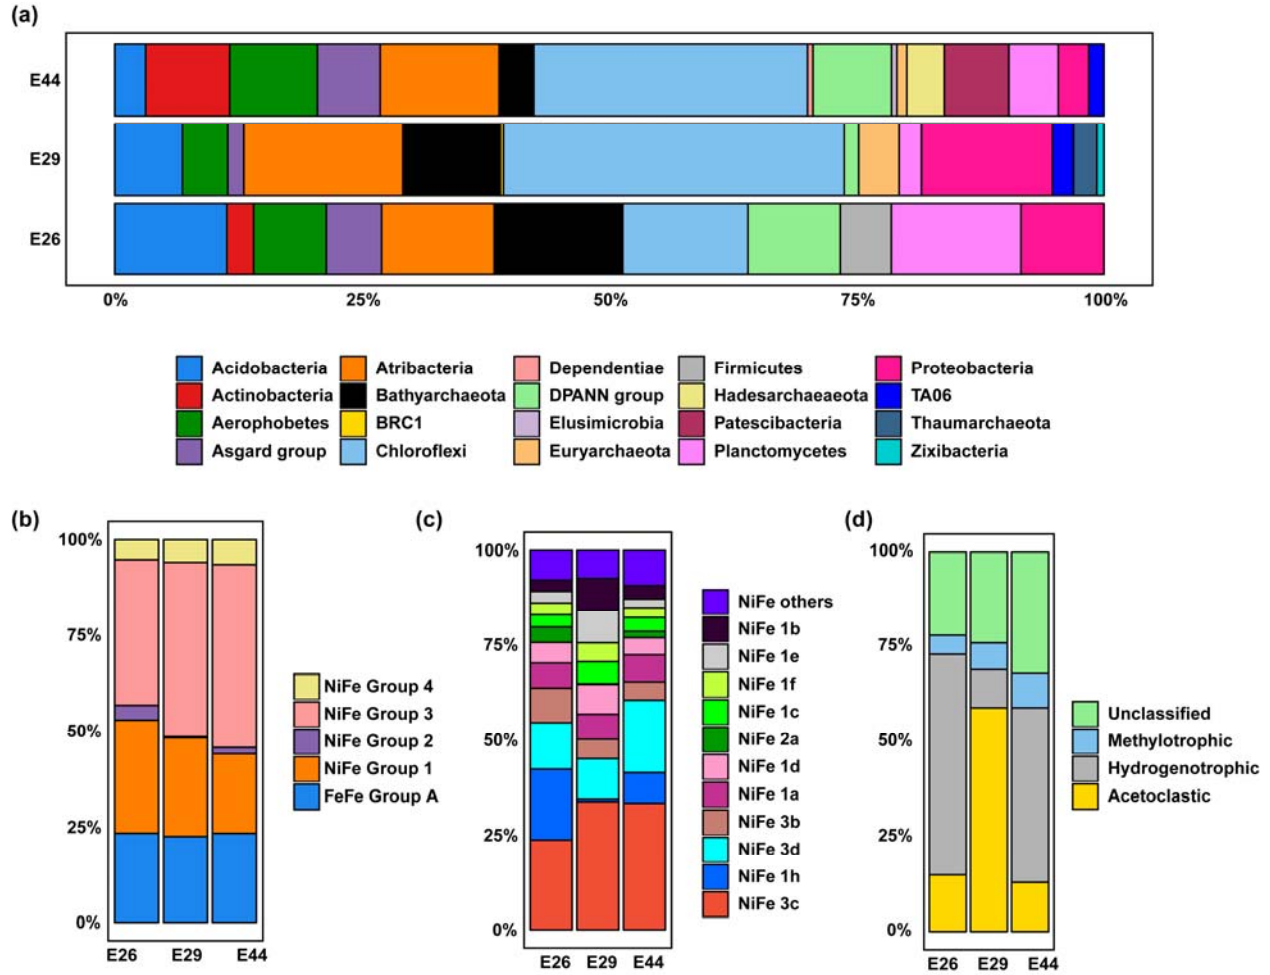

805

806 **Figure 2**

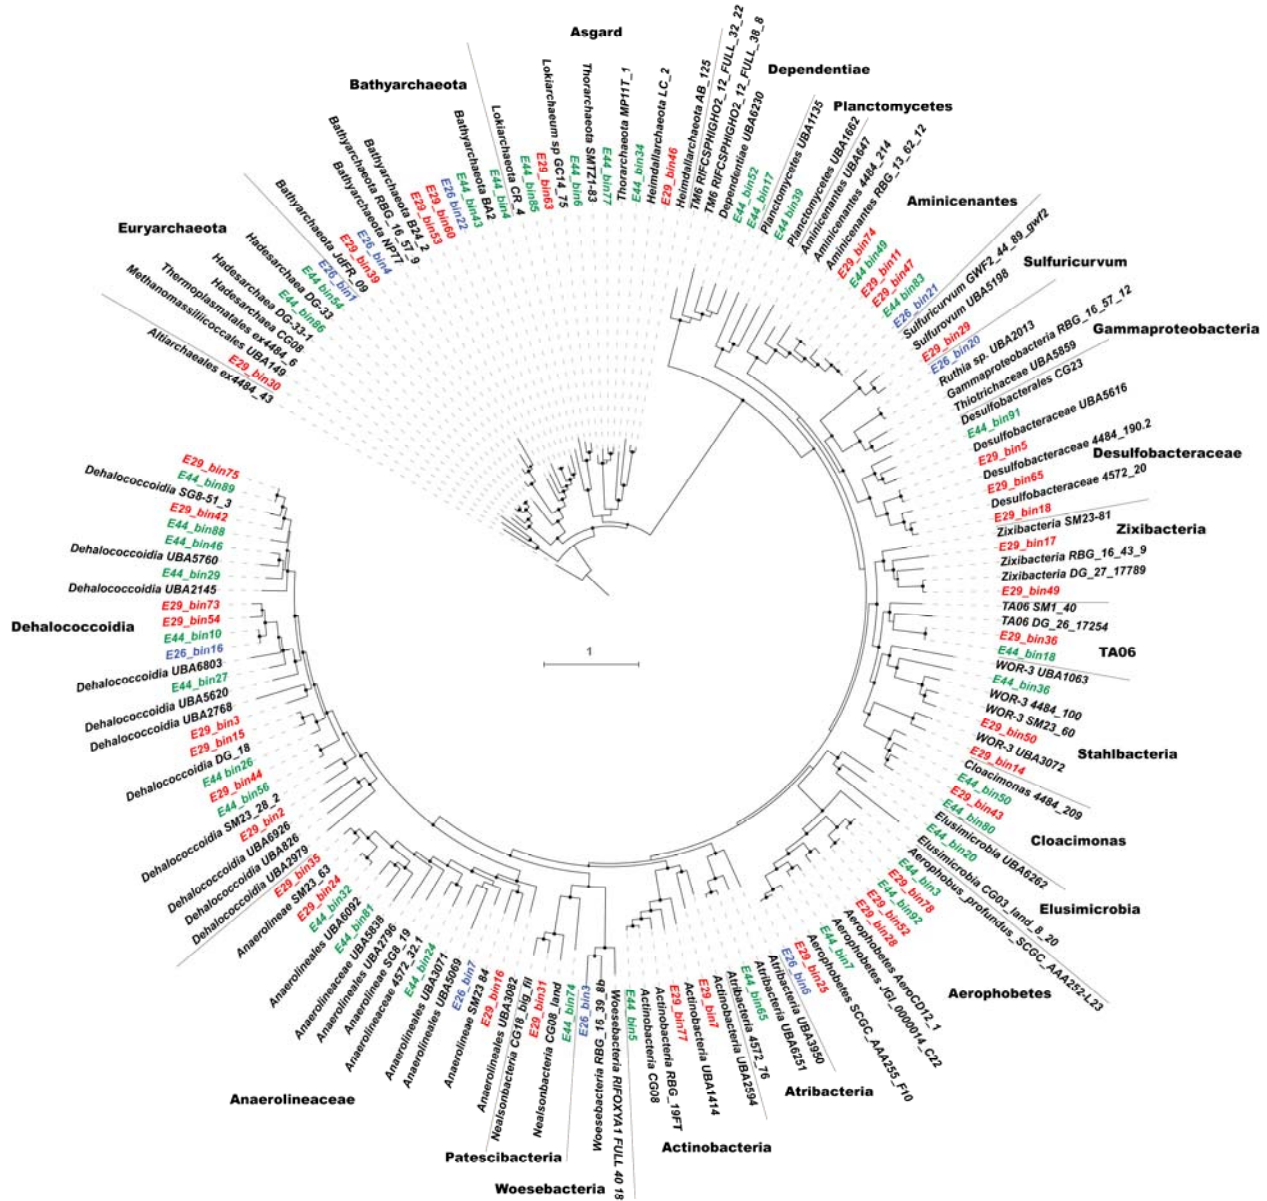

807



808 **Figure 3**

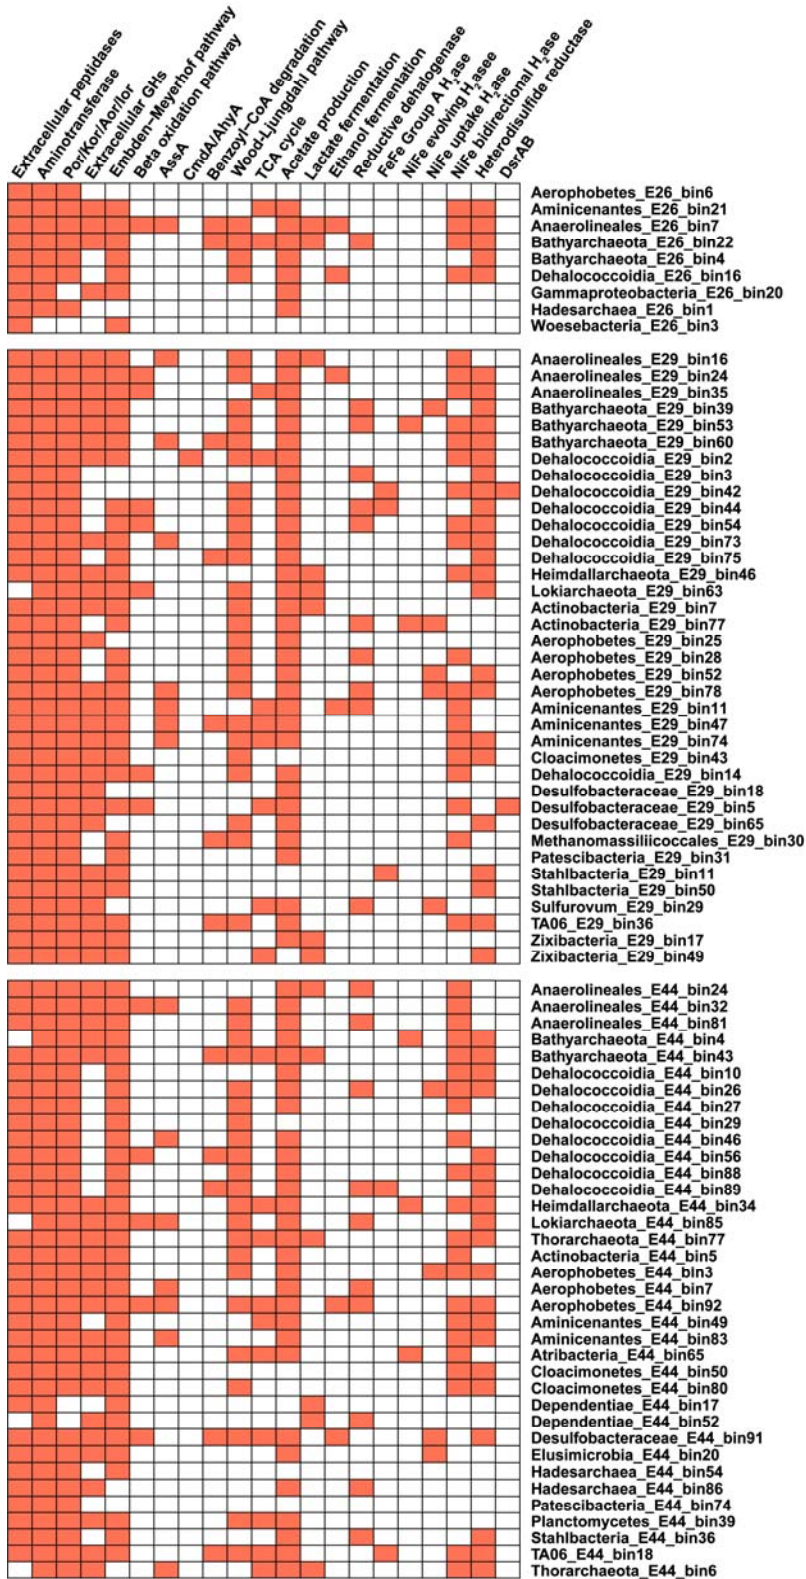

810 **Figure 4**

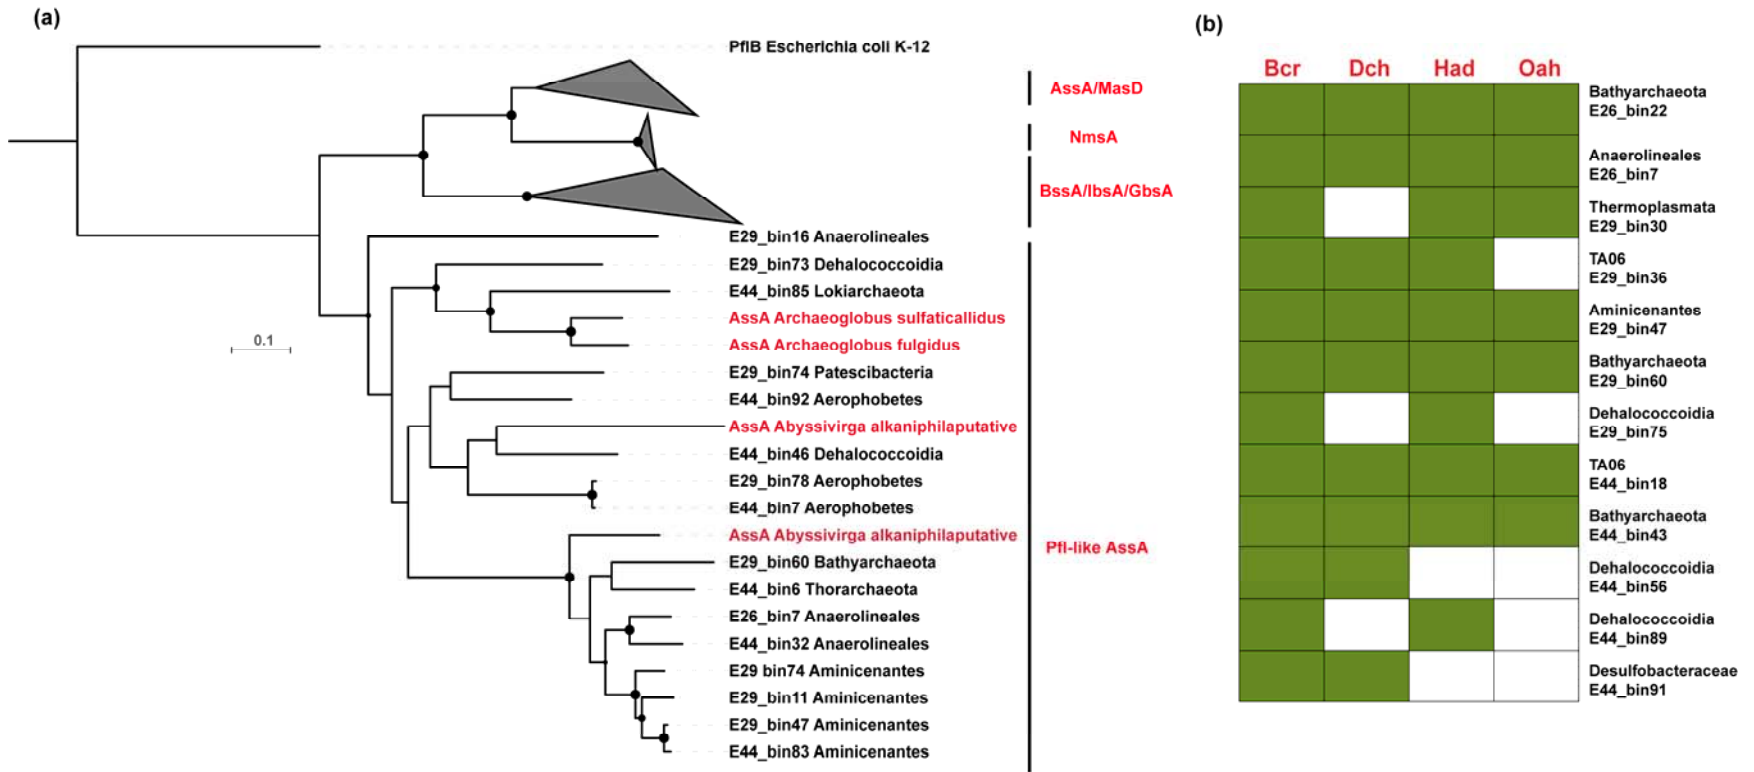

811



812 **Figure 5**

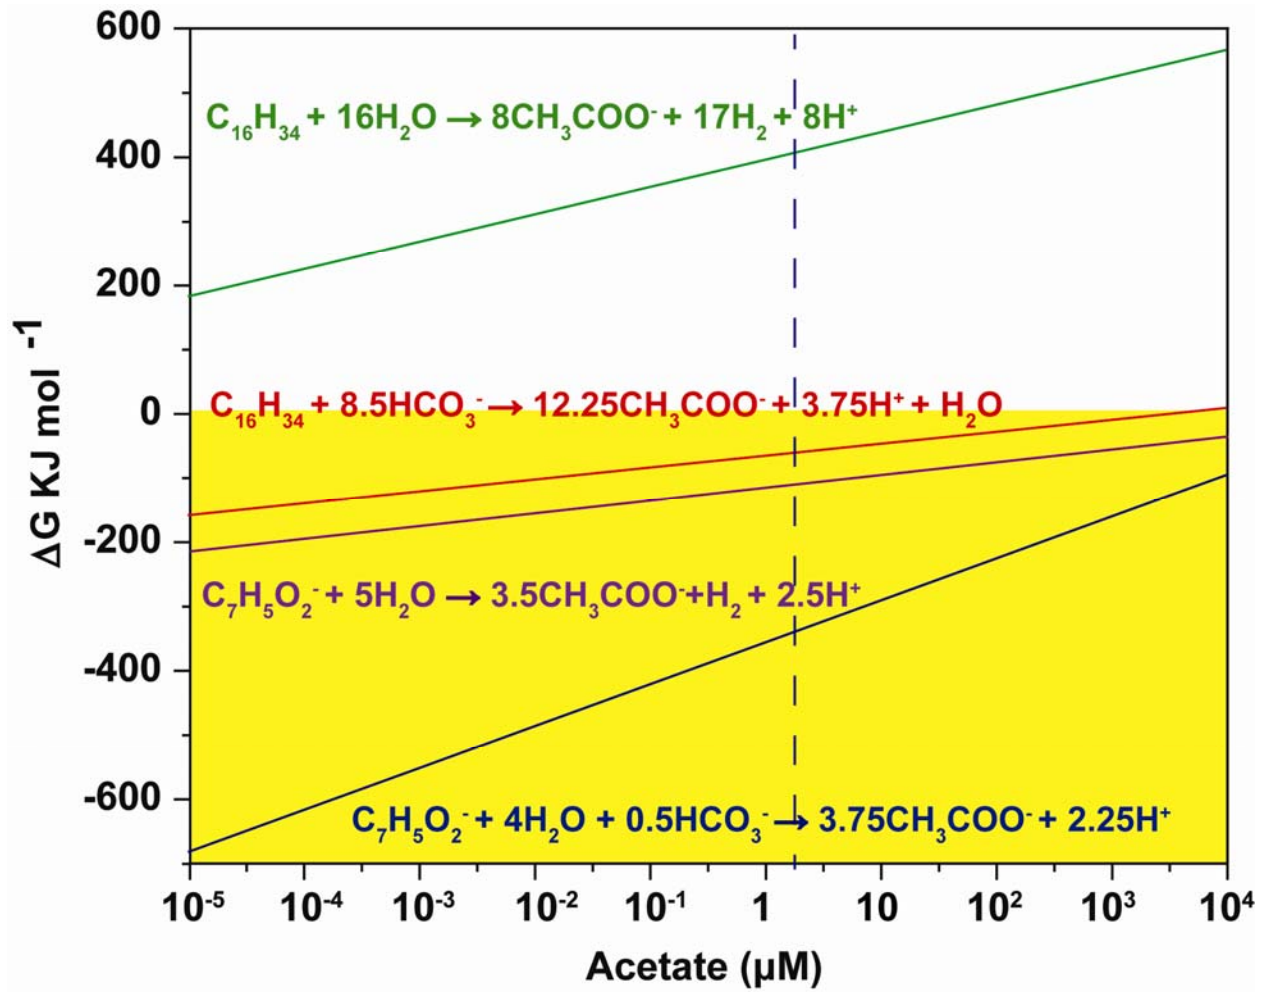

813

814 **Figure 6**

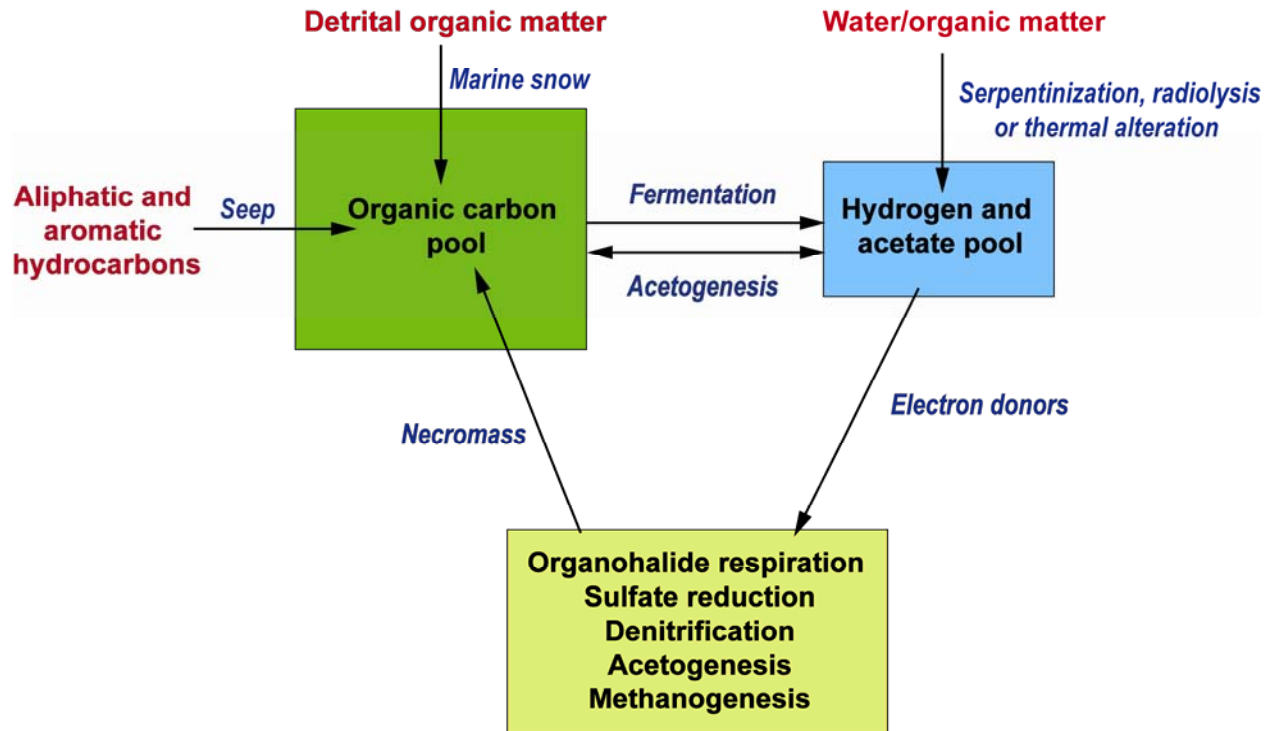

815

816
