1           **Metabolic potential of uncultured bacteria and archaea associated with**  
2                                   **petroleum seepage in deep-sea sediments**

3                   Xiyang Dong <sup>1,\*</sup>, Chris Greening <sup>2</sup>, Jayne E. Rattray <sup>1</sup>, Anirban Chakraborty <sup>1</sup>,  
4           Maria Chuvochina <sup>2</sup>, Daisuke Mayumi <sup>1,3</sup>, Jan Dolfing <sup>4</sup>, Carmen Li <sup>1</sup>, James M. Brooks <sup>5</sup>,  
5                   Bernie B. Bernard <sup>5</sup>, Ryan A. Groves<sup>1</sup>, Ian A. Lewis <sup>1</sup>, Casey R.J. Hubert <sup>1,\*</sup>

6           <sup>1</sup> Department of Biological Sciences, University of Calgary, Calgary, T2N 1N4, Canada

7           <sup>2</sup> School of Biological Sciences, Monash University, Clayton, VIC 3800, Australia

8           <sup>3</sup> Institute for Geo-Resources and Environment, Geological Survey of Japan, National Institute of  
9           Advanced Industrial Science and Technology (AIST), 1-1-1 Higashi, Tsukuba, 305-8567, Japan

10          <sup>4</sup> School of Engineering, Newcastle University, Newcastle upon Tyne, NE1 7RU, United  
11          Kingdom

12          <sup>5</sup> TDI Brooks International, College Station, Texas, TX 77845, USA

13

14          \* Corresponding authors. E-mail: [xiyang.dong@ucalgary.ca](mailto:xiyang.dong@ucalgary.ca) (X. Dong), [chubert@ucalgary.ca](mailto:chubert@ucalgary.ca) (C.  
15          R.J. Hubert).

16

17          The authors declare no conflict of interest.

## 18 **Abstract**

19 The lack of microbial genomes and isolates from the deep seabed means that very little is known  
20 about the ecology of this vast habitat. Here, we investigated energy and carbon acquisition  
21 strategies of microbial communities from three deep seabed petroleum seeps (3 km water depth)  
22 in the Eastern Gulf of Mexico. Shotgun metagenomic analysis revealed that each sediment  
23 harbored diverse communities of chemoheterotrophs and chemolithotrophs. We recovered 82  
24 metagenome-assembled genomes affiliated with 21 different archaeal and bacterial phyla.  
25 Multiple genomes encoded enzymes for anaerobic oxidation of aliphatic and aromatic  
26 compounds, including those of candidate phyla Aerophobetes, Aminicenantes, TA06 and  
27 Bathyarchaeota. Microbial interactions are predicted to be driven by acetate and molecular  
28 hydrogen. These findings are supported by sediment geochemistry, metabolomics, and  
29 thermodynamic modelling. Overall, we infer that deep-sea sediments experiencing thermogenic  
30 hydrocarbon inputs harbor phylogenetically and functionally diverse communities potentially  
31 sustained through anaerobic hydrocarbon, acetate and hydrogen metabolism.

32 Deep-sea sediments, generally understood to be those occurring in water depths greater than  
33 ~500 meters, represent one of the largest habitats on Earth. In recent years, culture-independent  
34 16S rRNA gene surveys and metagenomic studies have revealed these sediments host a vast  
35 abundance and diversity of bacteria and archaea<sup>1-8</sup>. Cell numbers decrease with sediment depth  
36 and age, from between  $10^6$  and  $10^{10}$  cm<sup>-3</sup> in the upper cm at the sediment-water interface to  
37 below  $10^4$  cm<sup>-3</sup> several kilometers below the ocean floor<sup>9,10</sup>. However, due to a lack of cultured  
38 representatives and genomes recovered from deep-sea sediments, it remains largely unresolved  
39 how microorganisms survive and function in these nutrient-limited ecosystems. Energy and  
40 carbon sources are essential requirements that allow the buried microorganisms to persist. With  
41 sunlight not reaching the deep seabed, photosynthetic processes do not directly support these  
42 communities<sup>11</sup>. It has therefore been proposed that deep sea benthic and subseafloor microbes  
43 are primarily sustained by complex detrital organic matter, including carbohydrates,  
44 proteinaceous compounds, and humic substances, derived from the overlying water column *via*  
45 sedimentation<sup>11-13</sup>.

46 Another important potential carbon and energy sources in deep-sea sediments are petroleum  
47 geofluids that migrate from subsurface reservoirs up to the seafloor<sup>14</sup>. Petroleum compounds  
48 include smaller gaseous molecules, such as methane, propane, and butane, and larger aliphatic  
49 and aromatic liquids. Numerous studies have investigated the role of methane oxidation in  
50 seabed sediments, which is mediated by anaerobic methanotrophic archaea (ANME), generally  
51 in syntrophy with bacteria respiring sulfate or other electron acceptors<sup>4,6,8,15,16</sup>. In contrast,  
52 little is known about the degradation of larger alkanes or aromatic compounds by deep seabed  
53 microorganisms. Vigneron et al.<sup>2</sup> performed a comparative gene-centric study of hydrocarbon  
54 and methane seeps in the Gulf of Mexico, and suggested that microorganisms in deep cold seeps

55 (water depth ~1 km) can potentially utilize a range of non-methane hydrocarbons. However, due  
56 to the absence of metagenome binning in that study, relevant metabolic functions were not  
57 assigned to specific pathways or taxa.

58 In addition to organic carbon compounds, microbial life in deep-sea sediments is also supported  
59 by inorganic electron donors. Some microorganisms have been isolated from deep sediments that  
60 are able to sustain themselves by oxidizing elemental sulfur, hydrogen sulfide, carbon monoxide,  
61 ammonia, and molecular hydrogen (H<sub>2</sub>)<sup>6, 8, 11</sup>. Of these, H<sub>2</sub> is a particularly important energy  
62 source given its production in large quantities by biological and geochemical processes. H<sub>2</sub> can  
63 be generated as a metabolic byproduct of fermentation, together with volatile fatty acids such as  
64 acetate, during organic matter degradation<sup>9, 17</sup>. H<sub>2</sub> can also be produced abiotically via  
65 serpentinization, radiolysis of water, or thermal alteration of sedimentary organic matter<sup>18</sup>. For  
66 example, the radiolysis of water by naturally occurring radionuclides (*e.g.* <sup>40</sup>K and <sup>238</sup>U) is  
67 estimated to produce 10<sup>11</sup> mol H<sub>2</sub> per year<sup>8, 19</sup>. Depending on the availability of electron  
68 acceptors, H<sub>2</sub> oxidation can be coupled to sulfate, nitrate, metal, and organohalide respiration, as  
69 well as acetogenesis and methanogenesis<sup>8, 11</sup>.

70 In this study, we used culture-independent approaches to study the role of microbial communities  
71 in the degradation of organic matter, including both detrital biomass and petroleum  
72 hydrocarbons. We performed metagenomic, geochemical and metabolomic analyses of deep  
73 seabed sediments (water depth ~3 km). Samples were chosen from three sites exhibiting  
74 evidence of different levels of migrated thermogenic hydrocarbons. Metagenomes generated  
75 from sediment samples of each site were assembled and binned to obtain metagenome-assembled  
76 genomes (MAGs) and to reconstruct metabolic pathways for dominant members of the microbial

77 communities. Complementing this genome-resolved metagenomics, a gene-centric analysis was  
78 performed by directly examining unassembled metagenomic data. Through the combination of  
79 metagenomics with geochemistry and metabolomics, supported by thermodynamic modeling, we  
80 provide evidence that (1) deep-sea sediments harbor phylogenetically diverse heterotrophic and  
81 lithotrophic microbial communities; (2) some members from the candidate phyla are engaged in  
82 degradation of aliphatic and aromatic compounds; and (3) microbial community members are  
83 likely interconnected *via* acetate and hydrogen metabolism.

## 84 **Results**

### 85 **Hydrocarbon migration in seabed sediments**

86 This study tested three petroleum-associated near-surface sediments (referred to as Sites E26,  
87 E29 and E44; see map in Supplementary Figure 1) sampled from the Eastern Gulf of Mexico <sup>20</sup>.  
88 Migrated thermogenic hydrocarbon content in the piston cores was analyzed for each of the three  
89 sites (Table 1). All three sediments contained high concentrations of aromatic compounds and  
90 liquid alkanes; aromatic compounds were most abundant at Site E26, while liquid alkanes were  
91 on average 2.5-fold higher concentration at Sites E26 and E29 than Site E44. Alkane gases were  
92 only abundant at Site E29 and were almost exclusively methane (CH<sub>4</sub>). CH<sub>4</sub> sources can be  
93 inferred from stable isotopic compositions of CH<sub>4</sub> and molar ratios of CH<sub>4</sub> to higher  
94 hydrocarbons <sup>15</sup>. Ratios of C<sub>1</sub>/(C<sub>2</sub>+C<sub>3</sub>) were greater than 1,000 and δ<sup>13</sup>C values of methane were  
95 more negative than -60‰, indicating that the CH<sub>4</sub> in these sediments was predominantly  
96 biogenic <sup>15, 21</sup>. Similar co-occurrence of biogenic methane and complex hydrocarbons have been  
97 reported in a nearby seep in the Mississippi Canyon in the Gulf of Mexico <sup>22</sup>. GC-MS revealed  
98 an unresolved complex mixture (UCM) of saturated hydrocarbons in the C<sub>15+</sub> range in all three

99 sites. Such UCM signals correspond to degraded petroleum hydrocarbons and may indicate the  
100 occurrence of oil biodegradation at these sites <sup>23</sup>.

### 101 **Phylogenetically diverse bacterial and archaeal communities**

102 Illumina NextSeq sequencing of genomic DNA from deep-sea sediment communities produced  
103 85,825,930, 148,908,270, and 138,795,692 quality-filtered reads for Sites E26, E29, and E44,  
104 respectively (Supplementary Table 1). The 16S rRNA gene amplicon sequencing results suggest  
105 that the sediments harbor diverse bacterial and archaeal communities, with Chao1 richness  
106 estimates of 359, 1375 and 360 amplicon sequence variants (ASVs) using bacterial-specific  
107 primers, and 195, 180 and 247 ASVs using archaeal-specific primers, for Sites E26, E29 and  
108 E44, respectively (Supplementary Table 2 and Supplementary Figure 2). In accordance with  
109 amplicon sequencing results, taxonomic profiling of metagenomes using small subunit ribosomal  
110 RNA (SSU rRNA) marker genes demonstrated that the most abundant phyla in the metagenomes  
111 were, in decreasing order, Chloroflexi (mostly classes *Dehalococcoidia* and *Anaerolineae*),  
112 *Candidatus* Atribacteria, Proteobacteria (mostly class *Deltaproteobacteria*), and *Candidatus*  
113 Bathyarchaeota (Supplementary Table 3 and Figure 1a). While the three sites share a broadly  
114 similar community composition, notable differences were *Ca.* Bathyarchaeota and Proteobacteria  
115 being in higher relative abundance at the sites associated with more hydrocarbons (E29 and E26;  
116 Table 1), whereas the inverse is true for Actinobacteria, the Patescibacteria group, and *Ca.*  
117 Aerophobetes that are all present in higher relative abundance at Site E44 where associated  
118 hydrocarbon levels are lower. Additional sampling is required to determine whether these  
119 differences are due to the presence of hydrocarbons or other factors.

120 Assembly and binning for the three metagenomes resulted in a total of 82 MAGs with >50%  
121 completeness and <10% contamination based on CheckM analysis<sup>24</sup>. Reconstructed MAGs  
122 comprise taxonomically diverse members from a total of six archaeal and 15 bacterial phyla  
123 (Figure 2 and Supplementary Table 4). Within the domain Bacteria, members of the phylum  
124 Chloroflexi are highly represented in each sample, especially from the classes *Dehalococcoidia*  
125 and *Anaerolineae*. Within the domain Archaea, members of phylum Bathyarchaeota were  
126 recovered from all three sites. Most other MAGs belong to poorly understood candidate phyla  
127 that lack cultured representatives, including Aminicenantes (formerly OP8), Aerophobetes  
128 (formerly CD12), Cloacimonas (formerly WWE1), Stahlbacteria (formerly WOR-3),  
129 Atribacteria (formerly JS1 and OP9), TA06 (Supplementary Note 1 and Supplementary Table 5),  
130 and the Asgard superphylum, including Lokiarchaeota, Thorarchaeota, and Heimdallarchaeota.

131 In summary, while there are considerable community-level differences between the three sample  
132 locations, the recovered MAGs share common taxonomic affiliations at the phylum and class  
133 levels. Guided by associated geochemistry from the three sediment cores (Table 1 and  
134 Supplementary Note 2), we subsequently analyzed the metabolic potential of these MAGs to  
135 understand how bacterial and archaeal community members generate energy and biomass in  
136 these natural petroleum-associated deep-sea environments. Hidden Markov models (HMMs) and  
137 homology-based models were used to search for the presence of different metabolic genes in  
138 both the recovered MAGs and unbinned metagenomes. Where appropriate, findings were further  
139 validated through metabolomic analyses, phylogenetic visualization, and analysis of gene  
140 context.

## 141 **Detrital biomass and hydrocarbon degradation**

142 In deep-sea marine sediments, organic carbon is supplied either as detrital matter from the  
143 overlying water column or as aliphatic and aromatic petroleum compounds that migrate upwards  
144 from underlying petroleum-bearing sediments <sup>11</sup>. With respect to detrital matter, genes involved  
145 in carbon acquisition and breakdown were prevalent across both archaeal and bacterial MAGs.  
146 These include genes encoding intracellular and extracellular carbohydrate-active enzymes and  
147 peptidases, as well as relevant transporters and glycolysis enzymes (Figure 3 and Supplementary  
148 Table 6). The ability to break down fatty acids and other organic acids *via* the beta-oxidation  
149 pathway was identified in 13 MAGs, including members of Chloroflexi, *Deltaproteobacteria*,  
150 Aerophobetes and Lokiarchaeota (Figure 3 and Supplementary Table 6). Metabolomics data  
151 supported these genomic predictions and showed a surprising degree of consistency between the  
152 geographically distinct sampling sites (Figure 4). Over 50 metabolites from eight pathways were  
153 detected in all the samples, including carbohydrate metabolism (*e.g.* glucose), amino acid  
154 metabolism (*e.g.* glutamate), and beta oxidation (*e.g.* 10-hydroxydecanoate). Together, the  
155 metagenomic and metabolomic data suggest that seabed microorganisms are involved in  
156 recycling of residual organic matter, including complex carbohydrates, proteins and lipids.

157 To identify the potential for microbial degradation of hydrocarbons, we focused on functional  
158 marker genes encoding enzymes that initiate anaerobic hydrocarbon biodegradation by activating  
159 mechanistically stable C-H bonds <sup>25</sup>. We obtained evidence that two of the four known pathways  
160 for oxygen-independent C-H activation <sup>25-28</sup> were present: hydrocarbon addition to fumarate by  
161 glycyl-radical enzymes <sup>28</sup> and hydroxylation with water by molybdenum cofactor-containing  
162 enzymes <sup>25</sup>. Glycyl-radical enzymes proposed to mediate hydrocarbon addition to fumarate were



163 found in 13 MAGs (Chloroflexi, Aminicenantes, Aerophobetes, Actinobacteria, Bathyarchaeota,  
164 Thorarchaeota and Lokiarchaeota) (Figure 3). The sequences identified are phylogenetically  
165 distant from canonical akyl-/arylalkylsuccinate synthases, but form a common clade with the  
166 glycy radical enzymes proposed to mediate alkane activation in anaerobic alkane degraders  
167 *Vallitalea guaymasensis* L81 and *Archaeoglobus fulgidus* VC-16<sup>29-31</sup> (Supplementary Figure 3).  
168 Based on quality-filtered reads, canonical AssA (n-alkane succinate synthase) and BssA (benzyl  
169 succinate synthase) enzymes are also encoded at these sites and were most abundant in Site E29  
170 (Supplementary Table 7). In agreement with this, metabolomics analysis detected six succinic  
171 acid conjugates involved in hydrocarbon activation, including conjugates of xylene, toluene,  
172 cyclohexane, and isopropane (Figure 4). For the hydroxylation pathway, a *Dehalococcoidia*  
173 MAG in Site E29 encoded proteins sharing over 40% sequence identities to the catalytic subunits  
174 of *p*-cymene dehydrogenase (Cmd) and alkane C<sub>2</sub>-methylene hydroxylase (Ahy) (Figure 3 and  
175 Supplementary Figure 4)<sup>32</sup>. Genes encoding enzymes catalyzing hydrocarbon carboxylation  
176 (*ubiD*-like), reverse methanogenesis (*mcrA*-like), and aerobic hydrocarbon degradation (*e.g.*  
177 *alkB*) were not detected (Supplementary Table 7). The latter result is expected due to the low  
178 concentrations of oxygen in the top 20 cm of organic rich seabed sediments<sup>11</sup>.

179 Our results also provide evidence that aromatic compounds can be anaerobically degraded *via*  
180 channeling into the central benzoyl-CoA degradation pathway. Through metabolomic analysis,  
181 we detected multiple intermediates (Figure 4) involved in both the production and degradation of  
182 benzoyl-CoA, a universal intermediate formed during the degradation of aromatic compounds<sup>33</sup>.  
183 Various compounds that can be activated to form benzoyl-CoA were detected, including  
184 benzoate, benzylsuccinate, 4-hydroxybenzoate, phenylacetate, acetophenone, and phenol. The  
185 downstream metabolite glutarate was also highly abundant (Figure 4). Benzoyl-CoA can be

186 reduced to cyclohex-1,5-diene-1-carboxyl-CoA by either the Class I ATP-dependent benzoyl-  
187 CoA reductase pathway (*bcr* genes, *e.g.* *Thauera aromatica*) or Class II ATP-independent  
188 reductase (*bam* genes, *e.g.* sulfate reducers)<sup>34</sup>. We identified *bcr* genes for the Class I pathways  
189 in 12 MAGs from both bacteria (*i.e.*, *Dehalococcoidia*, *Anaerolineae*, *Deltaproteobacteria*,  
190 Aminicenantes and TA06) and archaea (*i.e.*, *Thermoplasmata* and Bathyarchaeota) (Figure 3 and  
191 Supplementary Figure 5). Genes for further transformation of dienoyl-CoA to 3-hydroxypimelyl-  
192 CoA were also identified, *i.e.* those encoding 6-oxo-cyclohex-1-ene-carbonyl-CoA hydrolase  
193 (*oah*), cyclohex-1,5-dienecarbonyl-CoA hydratase (*dch*) and 6-hydroxycyclohex-1-ene-1-  
194 carbonyl-CoA dehydrogenases (*had*)<sup>35</sup> (Supplementary Figure 5). In combination, these results  
195 strongly suggest that the organisms represented by these MAGs mediate the typical downstream  
196 degradation of aromatic compounds through the central benzoyl-CoA Bcr-Dch-Had-Oah  
197 pathway. However, sources of benzoate other than via anaerobic degradation of the above  
198 compounds, cannot be ruled out based on current data.

## 199 **Production and consumption of acetate and hydrogen**

200 Analysis of MAGs from these deep-sea hydrocarbon-associated sediments suggests that  
201 fermentation, rather than respiration, is the primary mode of organic carbon turnover in these  
202 environments. Most recovered MAGs with capacity for heterotrophic carbon degradation lacked  
203 respiratory primary dehydrogenases and terminal reductases, with exception of several  
204 Proteobacteria and one Chloroflexi (Supplementary Table 6). In contrast, various MAGs  
205 contained genes indicating the capability for fermentative production of acetate (69 MAGs),  
206 lactate (14 MAGs), and ethanol (6 MAGs) (Figure 3 and Supplementary Table 6). These findings  
207 therefore provide genomic evidence supporting other studies emphasizing the importance of

208 fermentation, including acetate production, in deep-sea sediments<sup>12, 36</sup>. Acetate can also be  
209 produced by acetogenic CO<sub>2</sub> reduction through the Wood-Ljungdahl pathway using a range of  
210 inorganic and organic substrates<sup>15</sup>. Partial or complete sets of genes for the Wood-Ljungdahl  
211 pathway were found in 50 MAGs (Figure 3 and Supplementary Figure 6), including those  
212 affiliated with phyla previously inferred to mediate acetogenesis in deep-sea sediments through  
213 either the tetrahydrofolate-dependent bacterial pathway (*e.g.* Chloroflexi and Aerophobetes)<sup>7, 37</sup>  
214 or the tetrahydromethanopterin-dependent archaeal variant (*e.g.* Bathyarchaeota and Asgard  
215 group)<sup>38, 39</sup>. In addition, the signature diagnostic gene for the Wood-Ljungdahl pathway (*acsB*;  
216 acetyl-CoA synthase) is in high relative abundance in the quality-filtered metagenome reads at  
217 all three sites (Supplementary Table 7). The most abundant MAG at each site were all putative  
218 acetogenic heterotrophs, *i.e.* *Dehalococcoidia* E26\_bin16, Actinobacteria E44\_bin5, and  
219 Aminicenantes E29\_bin47 for Sites E26, E44 and E29 respectively (~3.3-4.5% relative  
220 abundance, Supplementary Table 4). These observations are in agreement with mounting  
221 evidence that homoacetogens play a quantitatively important role in organic carbon cycling in  
222 the marine deep biosphere<sup>38, 40, 41</sup>.

223 The potential for H<sub>2</sub> metabolism was also found in MAGs from all three sites. We screened  
224 putative hydrogenase genes from various subgroups in MAGs as well as unbinned metagenomic  
225 sequences (Figures 1, 3 and Supplementary Tables 6-7). Surprisingly few H<sub>2</sub> evolving-only  
226 hydrogenases were observed, with only five Group A [FeFe]-hydrogenases and five Group 4  
227 [NiFe]-hydrogenases detected across the bacterial and archaeal MAGs. Instead, the most  
228 abundant hydrogenases within the MAGs and quality-filtered unassembled reads were the Group  
229 3b, 3c, and 3d [NiFe]-hydrogenases. Group 3b and 3d hydrogenases are physiologically  
230 reversible, but generally support fermentation in anoxic environments by coupling NAD(P)H

231 reoxidation to fermentative H<sub>2</sub> evolution <sup>42-44</sup>. Group 3c hydrogenases mediate a central step in  
232 hydrogenotrophic methanogenesis, bifurcating electrons from H<sub>2</sub> to heterodisulfides and  
233 ferredoxin <sup>45</sup>; their functional role in bacteria and non-methanogenic archaea remains unresolved  
234 <sup>44</sup> yet corresponding genes frequently co-occur with heterodisulfide reductases across multiple  
235 archaeal and bacterial MAGs (Figure 3). Various Group 1 [NiFe]-hydrogenases were also  
236 detected, which are known to support hydrogenotrophic respiration in conjunction with a wide  
237 range of terminal reductases. This is consistent with previous studies in the Gulf of Mexico that  
238 experimentally measured the potential for hydrogen oxidation catalyzed by hydrogenase  
239 enzymes <sup>46</sup>.

240 Given the genomic evidence for hydrogen and acetate production in these sediments, we  
241 investigated whether any of the MAGs encoded terminal reductases to respire these compounds.  
242 In agreement with porewater sulfate concentrations (16-27 mM; see Supplementary Note 2), the  
243 key genes for dissimilatory sulfate reduction (*dsrAB*) were widespread across the metagenome  
244 reads, particularly at Site E29 (Supplementary Table 7); however, probably due to  
245 incompleteness of genomes or insufficient binning, these genes were identified only in two  
246 MAGs affiliated with *Deltaproteobacteria* and *Dehalococcoidia* (Supplementary Table 6). We  
247 also identified 31 putative reductive dehalogenase genes (*rdhA*) across 22 MAGs, mainly from  
248 Aminicenantes and Bathyarchaeota (Figure 3 and Supplementary Table 6); this suggests that  
249 organohalides, which can be produced through abiotic and biotic processes in marine ecosystems  
250 <sup>47</sup>, may be electron acceptors in these deep-sea sediments. At least two thirds of the MAGs  
251 corresponding to putative sulfate reducers and dehalorespirers encoded the capacity to  
252 completely oxidize acetate and other organic acids to CO<sub>2</sub> using either the reverse Wood-  
253 Ljungdahl pathway or TCA cycle (Figure 3 and Supplementary Table 6). Several of these MAGs

254 also harbored the capacity for hydrogenotrophic dehalorespiration *via* Group 1a and 1b [NiFe]-  
255 hydrogenases (Figure 3). In addition to these dominant uptake pathways, one MAG belonging to  
256 the epsilonproteobacterial genus *Sulfurovum* (E29\_bin29) included genes for the enzymes  
257 needed to oxidize either H<sub>2</sub> (group 1b [NiFe]-hydrogenase), elemental sulfur (*soxABXYZ*), and  
258 sulfide (*sqr*), using nitrate as an electron acceptor (*napAGH*); this MAG also has a complete set  
259 of genes for autotrophic CO<sub>2</sub> fixation *via* the reductive TCA cycle (Figure 3 and Supplementary  
260 Table 6).

261 The capacity for methanogenesis appears to be relatively low. The genes for methanogenesis  
262 were detected in quality-filtered unassembled reads in all three sediments and were mainly  
263 affiliated with acetoclastic methanogens at Site E29, and hydrogenotrophic methanogens at the  
264 other two sites (Figure 1d). However, none of the MAGs contained *mcrA* genes. Overall, the  
265 collectively weak *mcrA* signal in the metagenomes suggests that the high levels of biogenic  
266 methane detected by geochemical analysis (Table 1) is due to methanogenesis in deeper  
267 sediment layers. Similar phenomena have been observed in other sites, where *mcrA* genes are in  
268 low abundance despite clear geochemical evidence for biogenic methane<sup>48</sup>. Sequencing  
269 additional sediment depths at greater resolution would likely result in detection of *mcrA*-related  
270 methanogens and ANME lineages.

## 271 **Thermodynamic modelling**

272 Together, the geochemical, metabolomic, and metagenomic data strongly indicate that anaerobic  
273 degradation of aliphatic and aromatic compounds occurs in these deep-sea sediments (Table 1  
274 and Figures 3-4). Recreating the environmental conditions for cultivating the organisms  
275 represented by the retrieved MAGs is a challenging process, preventing further validation of the

276 degradation capabilities of these compounds (and other metabolisms) among the majority of the  
277 lineages represented by the MAGs retrieved here <sup>41</sup>. Instead, we provide theoretical evidence that  
278 anaerobic degradation of aliphatic and aromatic compounds is feasible in this environment by  
279 modelling whether these processes are thermodynamically favorable in the conditions typical of  
280 deep-sea sediments, namely high pressure and low temperature.

281 As concluded from the genome analysis and supported by metabolomics (Figures 3-4), it is  
282 likely that anaerobic degradation occurs through an incomplete oxidation pathway. However,  
283 due to incompleteness of the reconstructed genomes, we cannot exclude the possibility that  
284 complete oxidation of aliphatic and aromatic compounds to CO<sub>2</sub> occurs through, for example,  
285 coupling with sulfate reduction (Figure 3). Additionally, several recent studies indicate that some  
286 aliphatic and aromatic compounds can be incompletely oxidized to acetate *via* the Wood-  
287 Ljungdahl pathway <sup>37, 40, 49</sup>. Therefore, we compared the thermodynamic constraints on anaerobic  
288 biodegradation for three plausible scenarios (Table 2): (i) incomplete oxidation with production  
289 of hydrogen and acetate, (ii) acetogenic oxidation with production of acetate alone, and (iii)  
290 complete oxidation coupled with sulfate reduction. Hexadecane and benzoate are used as  
291 representative aliphatic and aromatic compounds, respectively, based on the results of  
292 geochemistry and metabolomics results (*e.g.* C<sub>2+</sub> alkane and benzoate detection) and genomic  
293 analysis (*e.g.* genes encoding for glycyl-radical enzymes and *bcr* genes). Under deep-sea  
294 conditions, without taking the *in situ* concentrations of hydrogen and acetate into consideration,  
295 the calculations show that sulfate-dependent complete oxidation of hexadecane and benzoate, as  
296 well as acetogenic oxidation of benzoate, would be energetically favorable. The three other  
297 reactions would be endergonic under most conditions, but based on the measured concentrations  
298 for both acetate and H<sub>2</sub> in these sediments being low (Supplementary Note 2) these reactions

299 could also take place in theory (Table 2 and Figure 5). This suggests that acetate- and H<sub>2</sub>-  
300 scavengers, by making acetogenic and hydrogenogenic degradation more thermodynamically  
301 favorable, may support activity of anaerobic degraders in the community.

## 302 **Discussion**

303 In this study, metagenomics revealed that most of the bacteria and archaea in the deep-sea  
304 sediment microbial communities sampled belong to candidate phyla that lack cultured  
305 representatives and sequenced genomes (Figures 1 and 2). As a consequence, it is challenging to  
306 link phylogenetic patterns with the microbial functional traits underpinning the biogeochemistry  
307 of deep seabed habitats. Here, we were able to address this by combining *de novo* assembly and  
308 binning of metagenomic data with petroleum geochemistry, metabolite identification, and  
309 thermodynamic modeling. Pathway reconstruction from 82 MAGs recovered from the three  
310 deep-sea near surface sediments revealed that many community members were capable of  
311 acquiring and hydrolyzing residual organic matter (Figure 3), whether supplied as detritus from  
312 the overlying water column or as autochthonously produced necromass. Heterotrophic  
313 fermenters and acetogens were in considerably higher relative abundance than heterotrophic  
314 respirers, despite the abundance of sulfate in the sediments (Supplementary Note 2). For  
315 example, while genomic coverage of putative sulfate reducers is relatively low (< 1% of the  
316 communities), putative acetogenic heterotrophs were the most abundant community members at  
317 each site. Therefore, microbial communities in the deep seabed are likely shaped more by the  
318 capacity to utilize available electron donors than by the availability of oxidants. In line with the  
319 different geochemical profiles at the three sites (Table 1), some differences in the composition of  
320 microbial communities and the abundance of key metabolic genes were observed (Figure 1 and

321 Supplementary Table 7). However, metabolic capabilities such as fermentation, acetogenesis,  
322 and hydrogen metabolism were conserved across diverse phyla in each site (Figure 3). This  
323 suggests some functional redundancy in these microbial communities, similar to that recently  
324 inferred in a study of Guaymas Basin hydrothermal sediments <sup>50</sup>.

325 In this context, multiple lines of evidence indicate aliphatic or aromatic compounds serve as  
326 carbon and energy sources for anaerobic populations in these deep-sea hydrocarbon seep  
327 environments (Tables 1 - 2; Figures 3 - 5). Whereas capacity for detrital organic matter  
328 degradation is a common feature in the genomes retrieved in this study, and from many other  
329 environments in general <sup>51</sup>, anaerobic degradation of aliphatic or aromatic compounds is a more  
330 exclusive feature that was detected in 19 out of 82 MAGs. In all three sediments, there was  
331 metagenomic and metabolomic evidence for anaerobic hydrocarbon oxidation *via* hydrocarbon  
332 addition to fumarate and hydroxylation pathways, as well as anaerobic aromatic compound  
333 degradation by the Class I benzoyl-CoA reductase pathway. The ability to utilize aliphatic or  
334 aromatic compounds may explain the ecological dominance (high relative abundance) of certain  
335 lineages of bacteria and archaea in these microbial communities (Figure 1a). Many of the  
336 detected phyla have previously been found to be associated with hydrocarbons in various  
337 settings. For example, Aerophobetes have been detected in other cold seep environments <sup>7</sup>,  
338 Aminicenantes are often found associated with fossil fuels <sup>52</sup>, and Chloroflexi harboring genes  
339 for anaerobic hydrocarbon degradation have been found in hydrothermal vent sediments <sup>4</sup>. While  
340 archaea have been reported to mediate oxidation of methane and other short-chain alkanes in  
341 sediments <sup>5, 26</sup>, few have been reported to anaerobically degrade larger hydrocarbons <sup>32</sup>. The  
342 finding that Bathyarchaeota and other archaeal phyla are potentially capable of anaerobic  
343 degradation of aliphatic or aromatic compounds extends the potential substrate spectrum for



344 archaea. More broadly, building on recent findings <sup>26</sup>, this work emphasize that non-methane  
345 aliphatic and aromatic compounds could significantly contribute to carbon and energy budgets in  
346 these deep-sea settings.

347 Genomic analyses of the 12 MAGs harboring genes for central benzoyl-CoA pathway indicate  
348 they have an acetogenic lifestyle. The finding that these organisms use the ATP-consuming class  
349 I, not the reversible class II, benzoyl-CoA reductase is surprising. It is generally thought that  
350 strict anaerobes must use class II BCRs because the amount of energy available from benzoate  
351 oxidation during sulfate reduction or fermentation is not sufficient to support the substantial  
352 energetic requirement of the ATP-dependent class I BCR reaction <sup>35</sup>. However, there are  
353 reported exceptions to these observations, such as the hyperthermophilic archaeon *Ferroglobus*  
354 *placidus* that couples benzoate degradation via the Class I system with iron reduction <sup>35</sup>, and  
355 fermentative deep-sea Chloroflexi strains DscP3 and Dsc4 that contain genes for class I benzoyl-  
356 CoA reductases <sup>37</sup>. Acetogenic oxidation may explain why the Class I reaction is energetically  
357 favorable; thermodynamic modelling indicates the free Gibbs energy yield of acetogenic  
358 oxidation of benzoate is much higher than its hydrogenogenic or complete oxidation (Table 2).  
359 These inferences are in line with mounting evidence that acetogens are important community  
360 members in energy-limited seafloor ecosystems <sup>38,40</sup>. Acetogens may be favored in such  
361 ecosystems given their utilization of many organic compounds is thermodynamically favourable,  
362 and their relatively high ATP yields <sup>38,40</sup>.

363 Based on the evidence presented here, we propose that acetate and hydrogen are the central  
364 intermediates underpinning community interactions and biogeochemical cycling in these deep-  
365 sea sediments. Despite the presence of putative acetogens and hydrogenogens, acetate and

366 hydrogen were below the limits of detection in sediment porewater (Supplementary Note 2),  
367 indicating both compounds are rapidly turned over by other community members. Consistently,  
368 microbial communities encoded the genes for the coupling of acetate consumption to sulfate  
369 reduction, organohalide respiration, and acetoclastic methanogenesis, consistent with other  
370 studies<sup>49, 53</sup>. Some community members also appear to be capable of H<sub>2</sub> consumption, including  
371 through respiratory membrane-bound enzymes and reversible cytosolic enzymes. In turn,  
372 hydrogen oxidation can support autotrophic carbon fixation and therefore may provide a  
373 feedback loop for regeneration of organic carbon. Moreover, acetate- and hydrogen-oxidizing  
374 community members are likely to promote upstream acetogenic and hydrogenogenic degradation  
375 of necromass and aliphatic or aromatic compounds. Thermodynamic modelling indicates that  
376 maintaining low acetate and hydrogen concentrations in the environment is important for  
377 promoting continuous oxidation of organic substrates (Table 2 and Figure 5).

## 378 **Methods**

### 379 **Sample selection based on geochemical characterization**

380 The three marine sediment samples used in this study were chosen from among several sites  
381 sampled as part of a piston coring seafloor survey in the Eastern Gulf of Mexico, as described  
382 previously<sup>20</sup>. Piston cores penetrating 5 to 6 meters below sea floor (mbsf) were sectioned in 20  
383 cm intervals on board the research vessel immediately following their retrieval. Three intervals  
384 from the bottom half of the core were chosen for geochemical analysis, and were either frozen  
385 immediately (for liquid hydrocarbon analyses), or flushed with N<sub>2</sub> and sealed in hydrocarbon-  
386 free gas tight metal canisters then frozen until analysis (for gaseous hydrocarbon analysis).  
387 Interstitial gas analysis was later performed on the headspace in the canisters using GC with

388 Flame Ionization Detector (GC-FID). Sediment samples for gas/liquid chromatography and  
389 stable isotope analysis were frozen, freeze-dried and homogenized then extracted using  
390 accelerated solvent extraction (ACE 200). Extracts were subsequently analyzed using GC/FID,  
391 GC/MS, a Perkin-Elmer Model LS 50B fluorometer, and Finnigan MAT 252 isotope mass  
392 spectrometry as detailed elsewhere<sup>54</sup>. On the basis of TSF and UCM concentration thresholds  
393 described previously<sup>20</sup>, core segments from E26 and E29 were qualified and core segments from  
394 E44 were disqualified for unambiguous occurrence of thermogenic liquid hydrocarbons.  
395 Additionally, interstitial hydrocarbon gases were observed in the core segments of E29. Samples  
396 from the surface 0-20 cm interval from these three cores were further analyzed as described  
397 below.

#### 398 **Porewater geochemistry**

399 Porewater sulfate and chloride concentrations were measured in a Dionex ICS-5000 reagent-free  
400 ion chromatography system (Thermo Scientific, CA, USA) equipped with an anion-exchange  
401 column (Dionex IonPac AS22; 4 × 250 mm; Thermo Scientific), an EGC-500 K<sub>2</sub>CO<sub>3</sub> eluent  
402 generator cartridge and a conductivity detector. Organic acids were analysed in the 0.2 μm  
403 filtered sediment porewater using a Thermo RS3000 HPLC fitted with an Ultimate 3000 UV  
404 detector. Separation was achieved over an Aminex HPX-87H organic acid column (BioRad,  
405 USA) under isocratic conditions (0.05 mM H<sub>2</sub>SO<sub>4</sub>) at 60°C with a run time of 20 minutes.  
406 Organic acids were compared to the retention time of known standards and the limit of detection  
407 for acetate was determined to be 2.5 μM.

## 408 **Metabolomic analysis**

409 For the analysis of metabolites, sediment was centrifuged at  $21,100 \times g$  for 10 minutes at room  
410 temperature, the supernatant was collected, diluted 1:1 in pure methanol, and filtered through 0.2  
411  $\mu\text{m}$  Teflon syringe filters. Each sediment was subsampled five times to assess technical  
412 variability across the sample. Metabolites present in the extracts were separated using ultra high-  
413 performance liquid chromatography (UHPLC) performed using a gradient of 20 mM ammonium  
414 formate at pH 3.0 in water (solvent A) and 0.1% formic acid (% v/v) in acetonitrile (solvent B) in  
415 conjunction with a Synchronis<sup>TM</sup> HILIC LC column (100mm  $\times$  2.1mm  $\times$  2.1 $\mu\text{m}$ ; Thermo  
416 Scientific). High-resolution mass spectral data were acquired on a Thermo Scientific Q-  
417 Exactive<sup>TM</sup> HF Hybrid Quadrupole-Orbitrap mass spectrometer coupled to an electrospray  
418 ionization source. Data were acquired in negative ion full-scan mode from 50-750  $m/z$  at 240,000  
419 resolution with an automatic gain control (AGC) target of  $3e6$  and a maximum injection time of  
420 200 ms. For MS/MS fragmentation experiments, an isolation window of 1  $m/z$  and an AGC  
421 target of  $1e6$  was used with a maximum injection time of 100 ms. Data were analyzed in  
422 MAVEN<sup>55</sup>. Metabolites were assigned based on accurate mass and retention times of observed  
423 signals relative to standards (where available). Metabolites classified as being involved in the  
424 anaerobic degradation of aliphatic and aromatic compound pathways<sup>56</sup>, for which metabolites  
425 standards are not readily available, were assigned using accurate mass alone. The key benzoate  
426 and succinate metabolites were assigned using accurate mass, co-elution and MS/MS  
427 fragmentation patterns. To control for variability in total organic content across the sediment  
428 samples, metabolite data are presented based on their fractional abundance relative to all  
429 observed metabolites (*i.e.* constant sum normalization) and were visualized based on their log  
430 fractional abundance<sup>57</sup>.

## 431 **DNA extraction and sequencing**

432 For the three sediment samples, DNA was extracted from 10 g of sediment using the PowerMax  
433 Soil DNA Isolation Kit (12988-10, QIAGEN) according to the manufacturer's protocol with  
434 minor modifications for the step of homogenization and cell lysis *i.e.*, cells were lysed in  
435 PowerMax Bead Solution tubes for 45 s at  $5.5 \text{ m s}^{-1}$  using a Bead Ruptor 24 (OMNI  
436 International). DNA concentrations were assessed using a Qubit 2.0 fluorometer (Thermo Fisher  
437 Scientific, Canada). Metagenomic library preparation and DNA sequencing was conducted at the  
438 Center for Health Genomics and Informatics in the Cumming School of Medicine, University of  
439 Calgary. DNA fragment libraries were prepared by shearing genomic DNA using a Covaris  
440 sonicator and the NEBNext Ultra II DNA library preparation kit (New England BioLabs). DNA  
441 was sequenced on a ~40 Gb (*i.e.* 130 M reads) mid-output NextSeq 500 System (Illumina Inc.)  
442 300 cycle ( $2 \times 150 \text{ bp}$ ) sequencing run.

443 To provide a high-resolution microbial community profile, as well as quantitative insights into  
444 microbial community diversity, the three samples were also subjected to 16S rRNA gene  
445 amplicon sequencing on a MiSeq benchtop sequencer (Illumina Inc.). DNA was extracted from  
446 separate aliquots of the same sediment samples using the DNeasy PowerLyzer PowerSoil kit  
447 (MO BIO Laboratories, a Qiagen Company, Carlsbad, CA, USA) and used as the template for  
448 different PCR reactions. The v3-4 region of the bacterial 16S rRNA gene and the v4-5 region of  
449 the archaeal 16S rRNA gene were amplified using the primer pairs SD-Bact-0341-bS17/SD-  
450 Bact-0785-aA21 and SD-Arch-0519-aS15/SD-Arch-0911-aA20, respectively<sup>58</sup> as described  
451 previously<sup>20</sup> on a ~15 Gb 600-cycle ( $2 \times 300 \text{ bp}$ ) sequencing run.

## 452 **Metagenomic assembly and binning**

453 Raw reads were quality-controlled by (1) clipping off primers and adapters and (2) filtering out  
454 artifacts and low-quality reads as described previously<sup>59</sup>. Filtered reads were assembled using  
455 metaSPAdes version 3.11.0<sup>60</sup> and short contigs (<500 bp) were removed. Sequence coverage  
456 was determined by mapping filtered reads onto assembled contigs using BBmap version 36  
457 (<https://sourceforge.net/projects/bbmap/>). Binning of metagenome contigs was performed using  
458 MetaBAT version 2.12.1 (--minContig 1500)<sup>61</sup>. Contaminated contigs in the produced bins were  
459 further removed based on genomic properties (GC, tetranucleotide signatures, and coverage) and  
460 taxonomic assignments using RefineM version 0.0.22<sup>62</sup>. Resulting bins were further examined  
461 for contamination and completeness using CheckM version 1.0.8 with the lineage-specific  
462 workflow<sup>24</sup>.

## 463 **Annotation**

464 For MAGs, genes were called by Prodigal (-p meta)<sup>63</sup>. Metabolic pathways were predicted  
465 against the KEGG GENES database using the GhostKOALA tool<sup>64</sup> and against the Pfam,  
466 TIGRfam and custom HMM databases (<https://github.com/banfieldlab/metabolic-hmms>) using  
467 MetaErg (<https://sourceforge.net/projects/metaerg/>). The dbCAN web server was used for  
468 carbohydrate-active gene identification (cutoffs: coverage fraction: 0.40; e-value: 1e-18)<sup>65</sup>.  
469 Genes encoding proteases and peptidases were identified using BLASTp against the MEROPS  
470 database release 12.0 (cutoffs: e-value, 1e-20; sequence identity, 30%)<sup>66</sup>. Genes involved in  
471 anaerobic hydrocarbon degradation were identified using BLASTp against a custom database  
472 (Supplementary Table 8) (cutoffs: e-value, 1e-20; sequence identity, 30%). Hydrogenases were  
473 identified and classified using a web-based search using the hydrogenase classifier HydDB<sup>67</sup>.

474 Full-length 16S rRNA genes were reconstructed from metagenomic reads using phyloFlash  
475 version 3.1 (<https://hrgv.github.io/phyloFlash/>) together with the SILVA SSU 132 rRNA  
476 database<sup>68</sup>. Diversity calculations were based on separate 16S rRNA gene amplicon library  
477 results<sup>20</sup>. Functional and taxonomic McrA gpkgs were used to assess the diversity of  
478 methanogens against the metagenomic reads using GraftM with default parameters<sup>69</sup>. Genes  
479 encoding the catalytic subunits of hydrogenases, *dsrA*, *acsB*, *assA*, *nmsA* and *bssA* were retrieved  
480 from metagenomic reads through diamond BLASTx<sup>70</sup> queries against comprehensive custom  
481 databases<sup>39, 67, 71</sup> (cutoffs: e-value, 1e-10; sequence identity, 70%).

## 482 **Phylogenetic analyses**

483 For taxonomic classification of each MAG, two methods were used to produce genome trees that  
484 were then used to validate each other. In the first method the tree was constructed using  
485 concatenated proteins of up to 16 syntenic ribosomal protein genes following procedures  
486 reported elsewhere<sup>72</sup>; the second tree was constructed using concatenated amino acid sequences  
487 of up to 43 conserved single-copy genes following procedures described previously<sup>73</sup>. Both trees  
488 were calculated using FastTree version 2.1.9 (-lg -gamma)<sup>74</sup> and resulting phylogenies were  
489 congruent. Reference genomes for relatives were accessed from NCBI GenBank, including  
490 genomes selected from several recent studies representing the majority of candidate bacterial and  
491 archaeal phylogenetic groups<sup>4, 62, 75-78</sup>. The tree in Figure 2 was inferred based on concatenation  
492 of 43 conserved single-copy genes (Supplementary Data 1). Specifically, it was built using  
493 RAxML version 8<sup>79</sup> implemented by the CIPRES Science Gateway<sup>80</sup> and it was called as  
494 follows: `raxmlHPC-HYBRID -f a -n result -s input -c 25 -N 100 -p 12345 -m PROTCATLG -x`  
495 `12345`. The phylogeny resulting from RAxML is consistent with the taxonomic classification of

496 MAGs that resulted from FastTree. Interactive tree of life (iTOL) version 3<sup>81</sup> was used for tree  
497 visualization and modification.

498 For phylogenetic placements of functional genes, sequences were aligned using the ClustalW  
499 algorithm included in MEGA7<sup>82</sup>. All positions with less than 95% site coverage were  
500 eliminated. Maximum-likelihood phylogenetic trees were constructed in MEGA7 and  
501 evolutionary distances were computed using the Poisson correction method. These trees were  
502 bootstrapped with 50 replicates.

### 503 **Thermodynamic calculations**

504 The values of Gibbs free energy of formation for substances were taken from Madigan et al.<sup>83</sup>  
505 and Dolfing et al.<sup>53</sup>. The pH used in all calculations was 8.0 as reported in a previous  
506 thermodynamic study of deep buried sediments<sup>40</sup>, partial pressure was 300 atm based on water  
507 depths at the three sites (<http://docs.bluerobotics.com/calc/pressure-depth/>), and temperature was  
508 set as 4°C to represent deep sea conditions<sup>84</sup>. Calculations and corrections based on actual  
509 temperatures, pressure, and concentrations followed accepted protocols for determining reaction  
510 kinetics and thermodynamics<sup>85</sup>.

### 511 **Acknowledgements**

512 The work was supported by a Genome Canada Genomics Applications Partnership Program  
513 (GAPP) award to C.R.J.H., who is supported by a Campus Alberta Innovates Program Chair.  
514 Metabolomics data were acquired by R.A.G. at the Calgary Metabolomics Research Facility  
515 (CMRF), which is supported by the International Microbiome Centre and the Canada Foundation  
516 for Innovation (CFI-JELF 34986). I.A.L. is supported by an Alberta Innovates Translational



517 Health Chair. C.G. is supported by an ARC DECRA Fellowship (DE170100310) and an ARC  
518 Discovery Project (DP180101762). We thank Xiaoli Dong and Marc Strous for establishing  
519 bioinformatics workflows and pipelines, the Centre for Health Genomics and Informatics at  
520 University of Calgary for NextSeq sequencing, Alexander Probst for providing the database of  
521 16 syntenic ribosomal proteins, and Nina Dombrowski and Brett Baker for providing a custom  
522 blast database for hydrocarbon degradation genes.

### 523 **Data availability**

524 DNA sequences (amplicon sequences, genomes and raw sequence reads) have been deposited in  
525 the NCBI BioProject database with accession number PRJNA415828 and PRJNASUB3936075  
526 (<https://www.ncbi.nlm.nih.gov/bioproject/>). The authors declare that all other data supporting the  
527 findings of this study are available within the article and its supplementary information files, or  
528 from the corresponding authors upon request.

### 529 **Author contributions**

530 X.D. and C.R.J.H. designed the study. X.D. and C.G. processed the data, reconstructed the  
531 genomes and performed the genome analyses. X.D., J.D. and D.M. performed thermodynamics  
532 analysis. M.C. confirmed phylogenetic analyses of genomes. A.C. and C.L. conducted amplicon  
533 sequencing and analyses. J.M.B. and B.B.B. collected samples and performed petroleum  
534 geochemistry analyses. J.E.R., R.A.G. and I.A.L. performed metabolomics analyses and data  
535 interpretation. X.D., C.G. and C.R.J.H. drafted the manuscript. All authors reviewed the results  
536 and participated in the writing of the manuscript.

## 537 **References**

- 538 1. Petro, C., Starnawski, P., Schramm, A. & Kjeldsen, K.U. Microbial community assembly  
539 in marine sediments. *Aquat Microb Ecol* **79**, 177-195 (2017).
- 540 2. Vigneron, A. et al. Comparative metagenomics of hydrocarbon and methane seeps of the  
541 Gulf of Mexico. *Sci Rep* **7**, 16015 (2017).
- 542 3. Marshall, I.P.G., Karst, S.M., Nielsen, P.H. & Jørgensen, B.B. Metagenomes from deep  
543 Baltic Sea sediments reveal how past and present environmental conditions determine  
544 microbial community composition. *Mar Genomics* **37**, 58-68 (2018).
- 545 4. Dombrowski, N., Seitz, K.W., Teske, A.P. & Baker, B.J. Genomic insights into potential  
546 interdependencies in microbial hydrocarbon and nutrient cycling in hydrothermal  
547 sediments. *Microbiome* **5**, 106 (2017).
- 548 5. Lloyd, K.G. et al. Predominant archaea in marine sediments degrade detrital proteins.  
549 *Nature* **496**, 215-218 (2013).
- 550 6. Orsi, W.D. Ecology and evolution of seafloor and subseafloor microbial communities.  
551 *Nat Rev Microbiol* (2018).
- 552 7. Wang, Y. et al. Draft genome of an *Aerophobetes* bacterium reveals a facultative lifestyle  
553 in deep-sea anaerobic sediments. *Sci Bull* **61**, 1176-1186 (2016).
- 554 8. Orcutt, B.N., Sylvan, J.B., Knab, N.J. & Edwards, K.J. Microbial ecology of the dark  
555 ocean above, at, and below the seafloor. *Microbiol Mol Biol Rev* **75**, 361-422 (2011).
- 556 9. Inagaki, F. et al. Exploring deep microbial life in coal-bearing sediment down to ~2.5 km  
557 below the ocean floor. *Science* **349**, 420-424 (2015).
- 558 10. Jørgensen, B.B. & Marshall, I.P. Slow microbial life in the seabed. *Ann Rev Mar Sci* **8**,  
559 311-332 (2016).
- 560 11. Jørgensen, B.B. & Boetius, A. Feast and famine--microbial life in the deep-sea bed. *Nat*  
561 *Rev Microbiol* **5**, 770-781 (2007).
- 562 12. Arndt, S. et al. Quantifying the degradation of organic matter in marine sediments: A  
563 review and synthesis. *Earth-Sci Rev* **123**, 53-86 (2013).
- 564 13. Orsi, W.D., Richards, T.A. & Francis, W.R. Predicted microbial secretomes and their  
565 target substrates in marine sediment. *Nat Microbiol* **3**, 32-37 (2018).

- 566 14. Brooks, J.M. et al. Deep-sea hydrocarbon seep communities: evidence for energy and  
567 nutritional carbon sources. *Science* **238**, 1138-1142 (1987).
- 568 15. Ijiri, A. et al. Deep-biosphere methane production stimulated by geofluids in the Nankai  
569 accretionary complex. *Sci Adv* **4**, eaao4631 (2018).
- 570 16. Ruff, S.E. et al. Global dispersion and local diversification of the methane seep  
571 microbiome. *Proc Natl Acad Sci U S A* **112**, 4015-4020 (2015).
- 572 17. Dong, X. et al. Fermentative Spirochaetes mediate necromass recycling in anoxic  
573 hydrocarbon-contaminated habitats. *ISME J* **12**, 2039-2050 (2018).
- 574 18. Lin, Y.-S. et al. Towards constraining H<sub>2</sub> concentration in subseafloor sediment: A  
575 proposal for combined analysis by two distinct approaches. *Geochim Cosmochim Acta*  
576 **77**, 186-201 (2012).
- 577 19. Sauvage, J., Flinders, A., Spivack, A. & D'Hondt, S. Global distribution of radiolytic H<sub>2</sub>  
578 production in marine sediment and implications for subsurface life. *AGU Fall Meeting*  
579 *Abstracts* (2017).
- 580 20. Chakraborty, A. et al. Thermophilic endospores associated with migrated thermogenic  
581 hydrocarbons in deep Gulf of Mexico marine sediments. *ISME J* **12**, 1895-1906 (2018).
- 582 21. Whiticar, M.J. Carbon and hydrogen isotope systematics of bacterial formation and  
583 oxidation of methane. *Chem Geol* **161**, 291-314 (1999).
- 584 22. Lapham, L.L., Chanton, J.P., Martens, C.S., Sleeper, K. & Woolsey, J.R. Microbial  
585 activity in surficial sediments overlying acoustic wipeout zones at a Gulf of Mexico cold  
586 seep. *Geochem Geophys Geosy* **9** (2008).
- 587 23. Killips, S.D. & Aljuboori, M.A.H.A. Characterization of the Unresolved Complex  
588 Mixture (UCM) in the gas chromatograms of biodegraded petroleums. *Org Geochem* **15**,  
589 147-160 (1990).
- 590 24. Parks, D.H., Imelfort, M., Skennerton, C.T., Hugenholtz, P. & Tyson, G.W. CheckM:  
591 assessing the quality of microbial genomes recovered from isolates, single cells, and  
592 metagenomes. *Genome Res* **25**, 1043-1055 (2015).
- 593 25. Boll, M. & Heider, J. in *Handbook of Hydrocarbon and Lipid Microbiology*. (ed. K.N.  
594 Timmis) 1011-1024 (Springer Berlin Heidelberg, Berlin, Heidelberg; 2010).
- 595 26. Laso-Perez, R. et al. Thermophilic archaea activate butane via alkyl-coenzyme M  
596 formation. *Nature* **539**, 396-401 (2016).

- 597 27. Meckenstock, R.U. et al. Anaerobic degradation of benzene and polycyclic aromatic  
598 hydrocarbons. *J Mol Microbiol Biotechnol* **26**, 92-118 (2016).
- 599 28. Tan, B. et al. Comparative analysis of metagenomes from three methanogenic  
600 hydrocarbon-degrading enrichment cultures with 41 environmental samples. *ISME J* **9**,  
601 2028-2045 (2015).
- 602 29. Schouw, A. et al. *Abyssivirga alkaniphila* gen. nov., sp. nov., an alkane-degrading,  
603 anaerobic bacterium from a deep-sea hydrothermal vent system, and emended  
604 descriptions of *Natranaerovirga pectinivora* and *Natranaerovirga hydrolytica*. *Int J Syst*  
605 *Evol Microbiol* **66**, 1724-1734 (2016).
- 606 30. Lakhal, R. et al. *Vallitalea guaymasensis* gen. nov., sp. nov., isolated from marine  
607 sediment. *Int J Syst Evol Microbiol* **63**, 3019-3023 (2013).
- 608 31. Khelifi, N. et al. Anaerobic oxidation of long-chain n-alkanes by the hyperthermophilic  
609 sulfate-reducing archaeon, *Archaeoglobus fulgidus*. *ISME J* **8**, 2153-2166 (2014).
- 610 32. Rabus, R. et al. Anaerobic Microbial Degradation of Hydrocarbons: From Enzymatic  
611 Reactions to the Environment. *J Mol Microbiol Biotechnol* **26**, 5-28 (2016).
- 612 33. Porter, A.W. & Young, L.Y. in *Advances in Applied Microbiology*, Vol. 88. (eds. S.  
613 Sariaslani & G.M. Gadd) 167-203 (Academic Press, 2014).
- 614 34. Dong, X. et al. Reconstructing metabolic pathways of a member of the genus  
615 *Pelotomaculum* suggesting its potential to oxidize benzene to carbon dioxide with direct  
616 reduction of sulfate. *FEMS Microbiol Ecol* **93**, fiw254-fiw254 (2017).
- 617 35. Holmes, D.E., Risso, C., Smith, J.A. & Lovley, D.R. Genome-scale analysis of anaerobic  
618 benzoate and phenol metabolism in the hyperthermophilic archaeon *Ferroglobus*  
619 *placidus*. *ISME J* **6**, 146-157 (2012).
- 620 36. Beulig, F., Røy, H., Glombitza, C. & Jørgensen, B.B. Control on rate and pathway of  
621 anaerobic organic carbon degradation in the seabed. *Proc Natl Acad Sci U S A* **115**, 367-  
622 372 (2018).
- 623 37. Sewell, H.L., Kaster, A.K. & Spormann, A.M. Homoacetogenesis in Deep-Sea  
624 *Chloroflexi*, as inferred by single-cell genomics, provides a link to reductive  
625 dehalogenation in terrestrial *Dehalococcoidetes*. *MBio* **8** (2017).

- 626 38. He, Y. et al. Genomic and enzymatic evidence for acetogenesis among multiple lineages  
627 of the archaeal phylum *Bathyarchaeota* widespread in marine sediments. *Nat Microbiol*  
628 **1**, 16035 (2016).
- 629 39. Adam, P.S., Borrel, G. & Gribaldo, S. Evolutionary history of carbon monoxide  
630 dehydrogenase/acetyl-CoA synthase, one of the oldest enzymatic complexes. *Proc Natl*  
631 *Acad Sci U S A* **115**, E1166-E1173 (2018).
- 632 40. Lever, M.A. Acetogenesis in the energy-starved deep biosphere - a paradox? *Front*  
633 *Microbiol* **2**, 284 (2011).
- 634 41. Yu, T. et al. Growth of sedimentary *Bathyarchaeota* on lignin as an energy source. *Proc*  
635 *Natl Acad Sci U S A* **115**, 6022-6027 (2018).
- 636 42. Berney, M., Greening, C., Conrad, R., Jacobs, W.R., Jr. & Cook, G.M. An obligately  
637 aerobic soil bacterium activates fermentative hydrogen production to survive reductive  
638 stress during hypoxia. *Proc Natl Acad Sci U S A* **111**, 11479-11484 (2014).
- 639 43. Ma, K., Hao, Z. & Adams, M.W.W. Hydrogen production from pyruvate by enzymes  
640 purified from the hyperthermophilic archaeon, *Pyrococcus furiosus*: A key role for  
641 NADPH. *FEMS Microbiol Lett* **122**, 245-250 (1994).
- 642 44. Greening, C. et al. Genomic and metagenomic surveys of hydrogenase distribution  
643 indicate H<sub>2</sub> is a widely utilised energy source for microbial growth and survival. *ISME J*  
644 **10**, 761 (2015).
- 645 45. Wagner, T., Koch, J., Ermler, U. & Shima, S. Methanogenic heterodisulfide reductase  
646 (HdrABC-MvhAGD) uses two noncubane [4Fe-4S] clusters for reduction. *Science* **357**,  
647 699-703 (2017).
- 648 46. Adhikari, R.R. et al. Hydrogen utilization potential in subsurface sediments. *Front*  
649 *Microbiol* **7**, 8 (2016).
- 650 47. Kawai, M. et al. High frequency of phylogenetically diverse reductive dehalogenase-  
651 homologous genes in deep seafloor sedimentary metagenomes. *Front Microbiol* **5**, 80  
652 (2014).
- 653 48. Carr, S.A. et al. Acetoclastic Methanosaeta are dominant methanogens in organic-rich  
654 Antarctic marine sediments. *ISME J* **12**, 330-342 (2018).
- 655 49. Liu, Y.F. et al. Metabolic capability and in situ activity of microorganisms in an oil  
656 reservoir. *Microbiome* **6**, 5 (2018).

- 657 50. Dombrowski, N., Teske, A.P. & Baker, B.J. Expansive microbial metabolic versatility  
658 and biodiversity in dynamic Guaymas Basin hydrothermal sediments. *Nat Commun* **9**,  
659 4999 (2018).
- 660 51. Baker, B.J., Lazar, C.S., Teske, A.P. & Dick, G.J. Genomic resolution of linkages in  
661 carbon, nitrogen, and sulfur cycling among widespread estuary sediment bacteria.  
662 *Microbiome* **3**, 14 (2015).
- 663 52. Hu, P. et al. Genome-resolved metagenomic analysis reveals roles for candidate phyla  
664 and other microbial community members in biogeochemical transformations in oil  
665 reservoirs. *MBio* **7**, e01669-01615 (2016).
- 666 53. Dolfing, J., Larter, S.R. & Head, I.M. Thermodynamic constraints on methanogenic  
667 crude oil biodegradation. *ISME J* **2**, 442-452 (2008).
- 668 54. Bernard, B.B. et al. Surface geochemical exploration and heat flow surveys in fifteen (15)  
669 frontier Indonesian basins. *Thirty-Second Annual Convention & Exhibition May 2008*  
670 (2008).
- 671 55. Melamud, E., Vastag, L. & Rabinowitz, J.D. Metabolomic Analysis and Visualization  
672 Engine for LC-MS Data. *Anal Chem* **82**, 9818-9826 (2010).
- 673 56. Gieg, L.M. & Toth, C.R.A. in *Anaerobic Utilization of Hydrocarbons, Oils, and Lipids*.  
674 (ed. M. Boll) 1-30 (Springer International Publishing, Cham; 2017).
- 675 57. Durbin, B. & Rocke, D.M. Approximate variance-stabilizing transformations for gene-  
676 expression microarray data. *Bioinformatics* **19**, 966-972 (2003).
- 677 58. Klindworth, A. et al. Evaluation of general 16S ribosomal RNA gene PCR primers for  
678 classical and next-generation sequencing-based diversity studies. *Nucleic Acids Research*  
679 **41**, e1-e1 (2013).
- 680 59. Kleiner, M. et al. Assessing species biomass contributions in microbial communities via  
681 metaproteomics. *Nat Commun* **8**, 1558 (2017).
- 682 60. Nurk, S., Meleshko, D., Korobeynikov, A. & Pevzner, P.A. metaSPAdes: a new versatile  
683 metagenomic assembler. *Genome Res* **27**, 824-834 (2017).
- 684 61. Kang, D.D., Froula, J., Egan, R. & Wang, Z. MetaBAT, an efficient tool for accurately  
685 reconstructing single genomes from complex microbial communities. *PeerJ* **3**, e1165  
686 (2015).

- 687 62. Parks, D.H. et al. Recovery of nearly 8,000 metagenome-assembled genomes  
688 substantially expands the tree of life. *Nat Microbiol* **2**, 1533-1542 (2017).
- 689 63. Hyatt, D. et al. Prodigal: prokaryotic gene recognition and translation initiation site  
690 identification. *BMC Bioinformatics* **11**, 119 (2010).
- 691 64. Lombard, V., Golaconda Ramulu, H., Drula, E., Coutinho, P.M. & Henrissat, B. The  
692 carbohydrate-active enzymes database (CAZy) in 2013. *Nucleic Acids Res* **42**, D490-495  
693 (2014).
- 694 65. Yin, Y. et al. dbCAN: a web resource for automated carbohydrate-active enzyme  
695 annotation. *Nucleic Acids Res* **40**, W445-451 (2012).
- 696 66. Rawlings, N.D. et al. The MEROPS database of proteolytic enzymes, their substrates and  
697 inhibitors in 2017 and a comparison with peptidases in the PANTHER database. *Nucleic*  
698 *Acids Res* **46**, D624-D632 (2018).
- 699 67. Søndergaard, D., Pedersen, C.N. & Greening, C. HydDB: A web tool for hydrogenase  
700 classification and analysis. *Sci Rep* **6**, 34212 (2016).
- 701 68. Quast, C. et al. The SILVA ribosomal RNA gene database project: improved data  
702 processing and web-based tools. *Nucleic Acids Res* **41**, D590-596 (2013).
- 703 69. Boyd, J.A., Woodcroft, B.J. & Tyson, G.W. GraftM: a tool for scalable, phylogenetically  
704 informed classification of genes within metagenomes. *Nucleic Acids Res* **46**, e59 (2018).
- 705 70. Buchfink, B., Xie, C. & Huson, D.H. Fast and sensitive protein alignment using  
706 DIAMOND. *Nat Methods* **12**, 59 (2014).
- 707 71. Anantharaman, K. et al. Expanded diversity of microbial groups that shape the  
708 dissimilatory sulfur cycle. *ISME J* **12**, 1715-1728 (2018).
- 709 72. Tully, B.J., Sachdeva, R., Graham, E.D. & Heidelberg, J.F. 290 metagenome-assembled  
710 genomes from the Mediterranean Sea: a resource for marine microbiology. *PeerJ* **5**,  
711 e3558 (2017).
- 712 73. Kato, S. et al. Genome-enabled metabolic reconstruction of dominant chemosynthetic  
713 colonizers in deep-sea massive sulfide deposits. *Environ Microbiol* **20**, 862-877 (2018).
- 714 74. Price, M.N., Dehal, P.S. & Arkin, A.P. FastTree 2--approximately maximum-likelihood  
715 trees for large alignments. *PLoS One* **5**, e9490 (2010).
- 716 75. Anantharaman, K. et al. Thousands of microbial genomes shed light on interconnected  
717 biogeochemical processes in an aquifer system. *Nat Commun* **7**, 13219 (2016).

- 718 76. Zaremba-Niedzwiedzka, K. et al. Asgard archaea illuminate the origin of eukaryotic  
719 cellular complexity. *Nature* **541**, 353-358 (2017).
- 720 77. Probst, A.J. et al. Differential depth distribution of microbial function and putative  
721 symbionts through sediment-hosted aquifers in the deep terrestrial subsurface. *Nat*  
722 *Microbiol* **3**, 328-336 (2018).
- 723 78. Hug, L.A. et al. A new view of the tree of life. *Nat Microbiol* **1**, 16048 (2016).
- 724 79. Stamatakis, A. RAxML version 8: a tool for phylogenetic analysis and post-analysis of  
725 large phylogenies. *Bioinformatics* **30**, 1312-1313 (2014).
- 726 80. Miller, M.A., Pfeiffer, W. & Schwartz, T. Creating the CIPRES Science Gateway for  
727 inference of large phylogenetic trees. *2010 Gateway Computing Environments Workshop*  
728 *(GCE)*, 1-8 (2010).
- 729 81. Letunic, I. & Bork, P. Interactive tree of life (iTOL) v3: an online tool for the display and  
730 annotation of phylogenetic and other trees. *Nucleic Acids Res* **44**, W242-245 (2016).
- 731 82. Kumar, S., Stecher, G. & Tamura, K. MEGA7: Molecular Evolutionary Genetics  
732 Analysis Version 7.0 for Bigger Datasets. *Mol Biol Evol* **33**, 1870-1874 (2016).
- 733 83. Madigan, M.T., Martinko, J.M. & Parker, J. Brock biology of microorganisms, Vol. 13.  
734 (Pearson, 2017).
- 735 84. Xu, W.Y., Lowell, R.P. & Peltzer, E.T. Effect of seafloor temperature and pressure  
736 variations on methane flux from a gas hydrate layer: Comparison between current and  
737 late Paleocene climate conditions. *J Geophys Res-Sol Ea* **106**, 26413-26423 (2001).
- 738 85. Dolfing, J. in *Hydrocarbon and Lipid Microbiology Protocols*. (eds. T.J. McGenity, K.N.  
739 Timmis & B. Nogales Fernández) 155-163 (Springer Berlin Heidelberg, Berlin,  
740 Heidelberg; 2015).



741 **Tables and Figures**

742 **Table 1 Geochemical description of sediment samples from Sites E26, E29 and E44. TSF**

743 Max: total scanning fluorescence maximum intensity. UCM: unresolved complex mixture.  $\Sigma n$ -

744 Alk: sum of C<sub>15</sub>-C<sub>34</sub> n-alkanes.  $\Sigma$ Alk Gas: total alkane gases. C<sub>2+</sub> Alk: sum of alkane gases larger

745 than methane. T/D: thermogenic/diagenetic n-alkane ratio.

746

| <i>Core ID</i>                                                       | <i>Site E26</i> | <i>Site E29</i> | <i>Site E44</i> |
|----------------------------------------------------------------------|-----------------|-----------------|-----------------|
| <i>Latitude (N)</i>                                                  | 26.59           | 27.43           | 26.28           |
| <i>Longitude (W)</i>                                                 | 87.51           | 86.01           | 86.81           |
| <i>Water depth (km)</i>                                              | 2.8             | 3.2             | 3.0             |
| <i>Total Scanning Fluorescence MAX</i>                               | 57326.7         | 26738.3         | 13502.3         |
| <i>Unresolved Complex Mixture (<math>\mu\text{g g}^{-1}</math>)</i>  | 32              | 13              | 7.3             |
| <i><math>\Sigma n</math>-Alkanes (<math>\text{ng g}^{-1}</math>)</i> | 2845.3          | 2527            | 1045            |
| <i>Thermogenic/Diagenetic Ratio</i>                                  | 1.0             | 2.6             | 0.8             |
| <i><math>\Sigma</math>Alkane Gas (ppm)</i>                           | 9               | 36012           | 9.9             |
| <i>C<sub>2+</sub> Alkanes (ppm)</i>                                  | 0.3             | 17.5            | 0.5             |
| <i>C<sub>1</sub>/(C<sub>2</sub>+C<sub>3</sub>)</i>                   | NA              | 3974.2          | NA              |
| <i><math>\delta^{13}\text{CH}_4</math> (‰, vs. PDB)*</i>             | NA              | -85.1           | NA              |

752

753 \* The  $\delta^{13}\text{CH}_4$  values in Site E26 and E29 could not be determined due to low methane

754 concentration, which can be approximated by subtracting C<sub>2+</sub> Alkanes from  $\Sigma$ Alkane Gas.

755 **Table 2 Thermodynamic parameters and Gibbs free energies for anaerobic benzoate and hexadecane degradation scenarios in**  
 756 **deep-sea sediments.**

| Substrates        | Reaction types              | Reactions                                                                          | $\Delta G^\circ$<br>(kJ) | $\Delta H^\circ$<br>(kJ) | $\Delta G_{4,300}^\circ$<br>(kJ)* |
|-------------------|-----------------------------|------------------------------------------------------------------------------------|--------------------------|--------------------------|-----------------------------------|
| <b>Hexadecane</b> | 1. Hydrogenogenic oxidation | $C_{16}H_{34} + 16H_2O \rightarrow 8CH_3COO^- + 17H_2 + 8H^+$                      | 1089.1                   | 1069.8                   | 753.3                             |
|                   | 2. Acetogenic oxidation     | $C_{16}H_{34} + 8.5HCO_3^- \rightarrow 12.25CH_3COO^- + 3.75H^+ + H_2O$            | 176.3                    | 98.4                     | 133.9                             |
|                   | 3. Complete oxidation       | $C_{16}H_{34} + 12.25SO_4^{2-} \rightarrow 16HCO_3^- + 12.25HS^- + H_2O + 3.75H^+$ | -407.3                   | 24.9                     | -653.3                            |
| <b>Benzoate</b>   | 4. Hydrogenogenic oxidation | $C_7H_5O_2^- + 7H_2O \rightarrow 3CH_3COO^- + HCO_3^- + 3H_2 + 3H^+$               | 120.9                    | 117.4                    | 12.8                              |
|                   | 5. Acetogenic oxidation     | $C_7H_5O_2^- + 0.5HCO_3^- \rightarrow 3.75CH_3COO^- + 2.25H^+$                     | -846.3                   | -1091.3                  | -950.3                            |
|                   | 6. Complete oxidation       | $C_7H_5O_2^- + 3.75SO_4^{2-} + 4H_2O \rightarrow 7HCO_3^- + 3.75HS^- + 2.25H^+$    | -76.2                    | 29.4                     | -230.7                            |

757

758 \* The Gibbs free energies were calculated for deep-sea conditions of 4 °C, 300 atm, and 2 mM bicarbonate concentrations <sup>40</sup>.

759

760 **Figure 1 Relative frequency of metagenomic sequence reads for different marker genes at**  
761 **Sites E26, E29 and E44.** (a) Community composition based on reconstruction of full-length 16S  
762 rRNA genes from the metagenomes. Eukaryotes and unassigned reads are not shown. (b)  
763 Relative occurrences of hydrogenases with different metal cofactors. (c) Relative abundance of  
764 different subtypes of NiFe hydrogenases. (d) Relative abundance of *mcrA* genes indicative of  
765 different types of methanogenesis.

766 **Figure 2 Phylogenetic placement of 82 reconstructed metagenome-assembled genomes.** A  
767 maximum-likelihood phylogenomic tree was built based on concatenated amino acid sequences  
768 of 43 conserved single copy genes using RAxML with the PROTGAMMALG model. Sequences  
769 of Altiaarchaeales ex4484\_43 were used as an outgroup. The scale bar represents 1 amino acid  
770 substitution per sequence position. Bootstrap values > 70% are indicated. Blue for Site E26  
771 (E26\_binX), red for Site E29 (E29\_binY), and green for Site E44 (E44\_binZ). The genome  
772 sequences used for inferring Figure 2 are available in Supplementary Data 1.

773 **Figure 3 Identification of functional genes or pathways present in MAGs.** The presence of  
774 genes or pathways are indicated by orange shaded boxes. Gene names: Aor, aldehyde:ferredoxin  
775 oxidoreductase; Kor, 2-oxoglutarate/2-oxoacid ferredoxin oxidoreductase; Por,  
776 pyruvate:ferredoxin oxidoreductase; Ior, indolepyruvate ferredoxin oxidoreductase; GHs,  
777 glycoside hydrolases; AssA, catalytic subunit of alkylsuccinate synthase. CmdA, catalytic  
778 subunit of p-cymene dehydrogenase; AhyA, catalytic subunit of alkane C2-methylene  
779 hydroxylase; H<sub>2</sub>ase, hydrogenase; DsrAB, dissimilatory sulfite reductase. Pathways were  
780 indicated as being present if at least five genes in the Embden-Meyerhof-Parnas pathway, three  
781 genes in the beta-oxidation pathway, four genes in the Wood-Ljungdahl pathway, and six genes

782 in the TCA cycle were detected. Additional details for the central benzoyl-CoA degradation  
783 pathway can be found in Supplementary Figure 5. Lactate and ethanol fermentation are indicated  
784 if genes encoding respective dehydrogenases were detected. More details about these functional  
785 genes and pathways can be found in the text and in Supplementary Table 6.

786 **Figure 4 Heatmap of metabolites identified in sediment pore water at Sites E26, E29 and**  
787 **E44 calculated using log fractional abundance.** Metabolite levels were measured by LC-MS  
788 and observed intensities are expressed as the log fractional abundance. Technical replicate  
789 numbers ( $n = 5$ ) from each site are given on the bottom axis. Compound names are listed on the  
790 right axis and pathway assignments on the left. Compounds denoted with an asterisk can be  
791 intermediates in both anaerobic and aerobic metabolic pathways.

792 **Figure 5 Thermodynamic constraints on anaerobic benzoate and hexadecane degradation**  
793 **in deep sea sediments.** Three reactions (Reactions 1, 2 and 4) are illustrated as taken from Table  
794 2 where  $\Delta G^{\circ}_{4,300} > 0$ . Thermodynamics for each reaction are indicated by a line in its  
795 corresponding color. If  $\Delta G^{\circ} < 0$ , the reaction is energetically favorable (indicated by arrow), and  
796 if  $\Delta G^{\circ} > 0$  the reaction is assumed not to occur. In the studied environment (outlined in the  
797 shaded area), hydrogen concentrations fall below  $1 \mu\text{M}$  while acetate concentrations are below  
798  $2.5 \mu\text{M}$ . The graph shows that  $\Delta G^{\circ}$  for three reactions are all negative when both actual  
799 concentrations of acetate and hydrogen are taken into consideration.

(a)

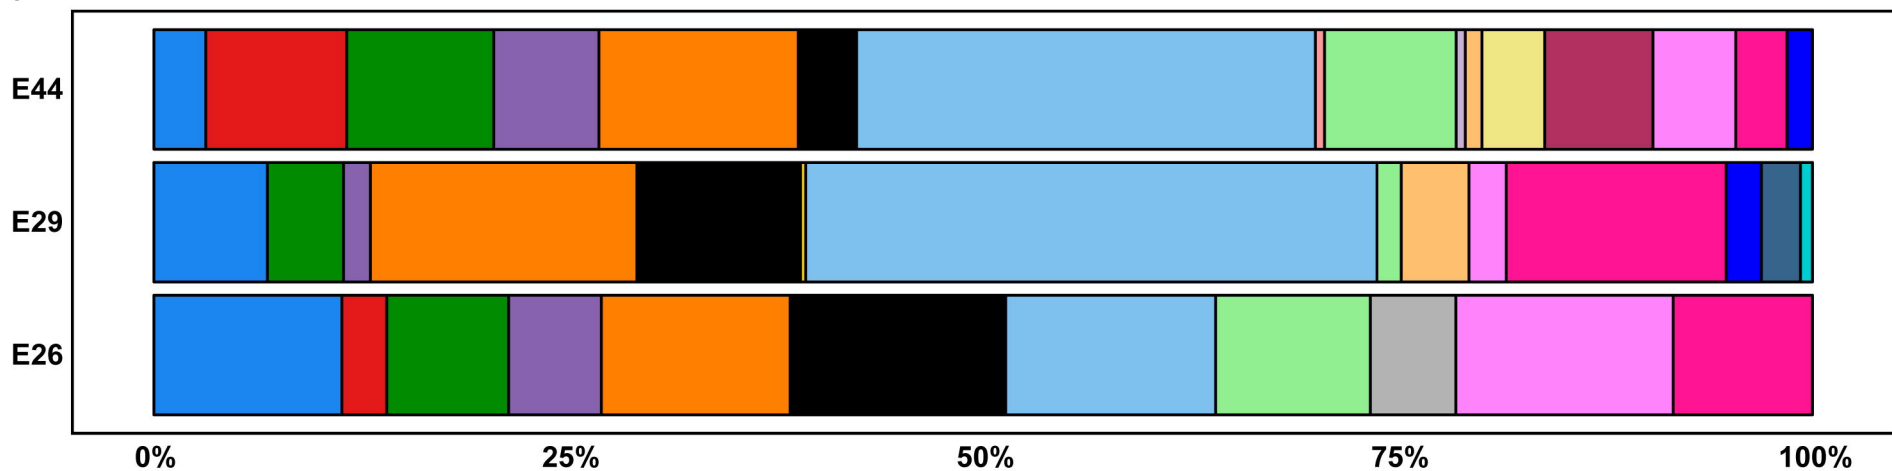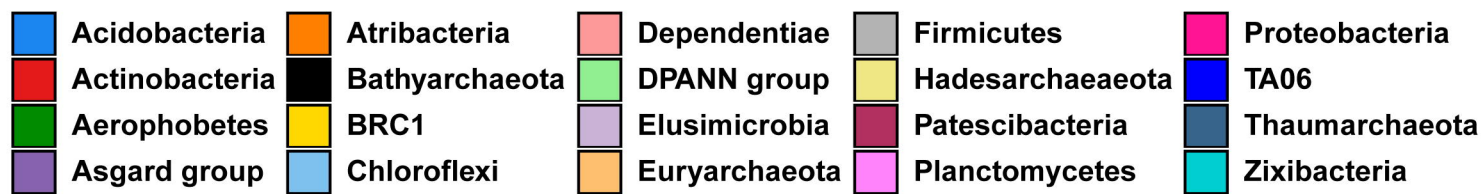

(b)

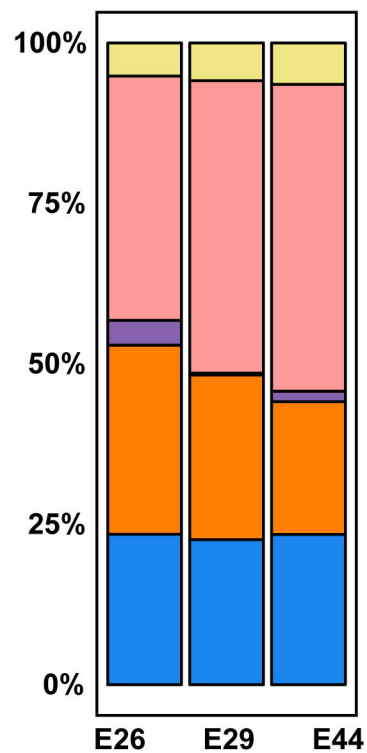

(c)

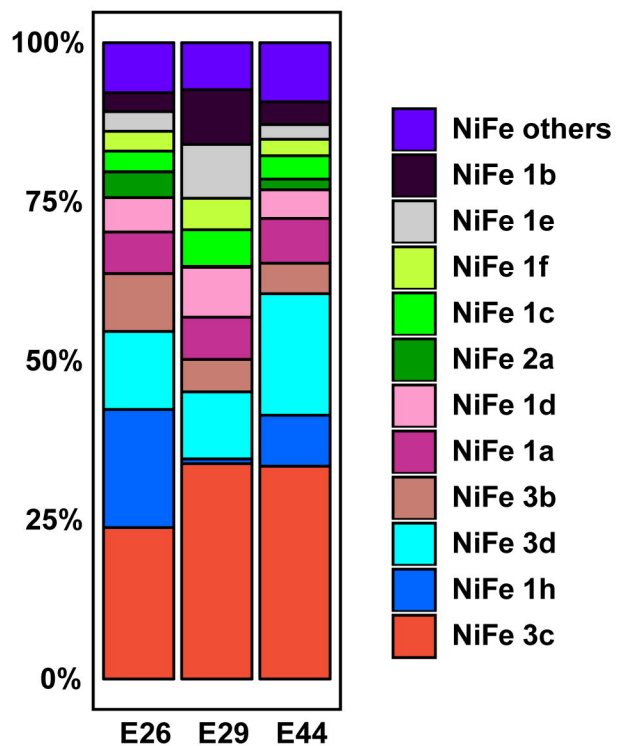

(d)

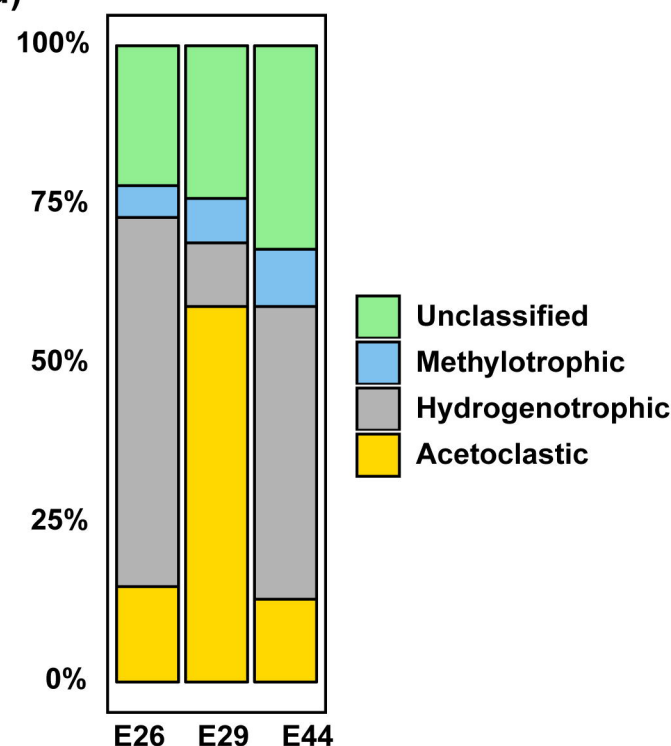

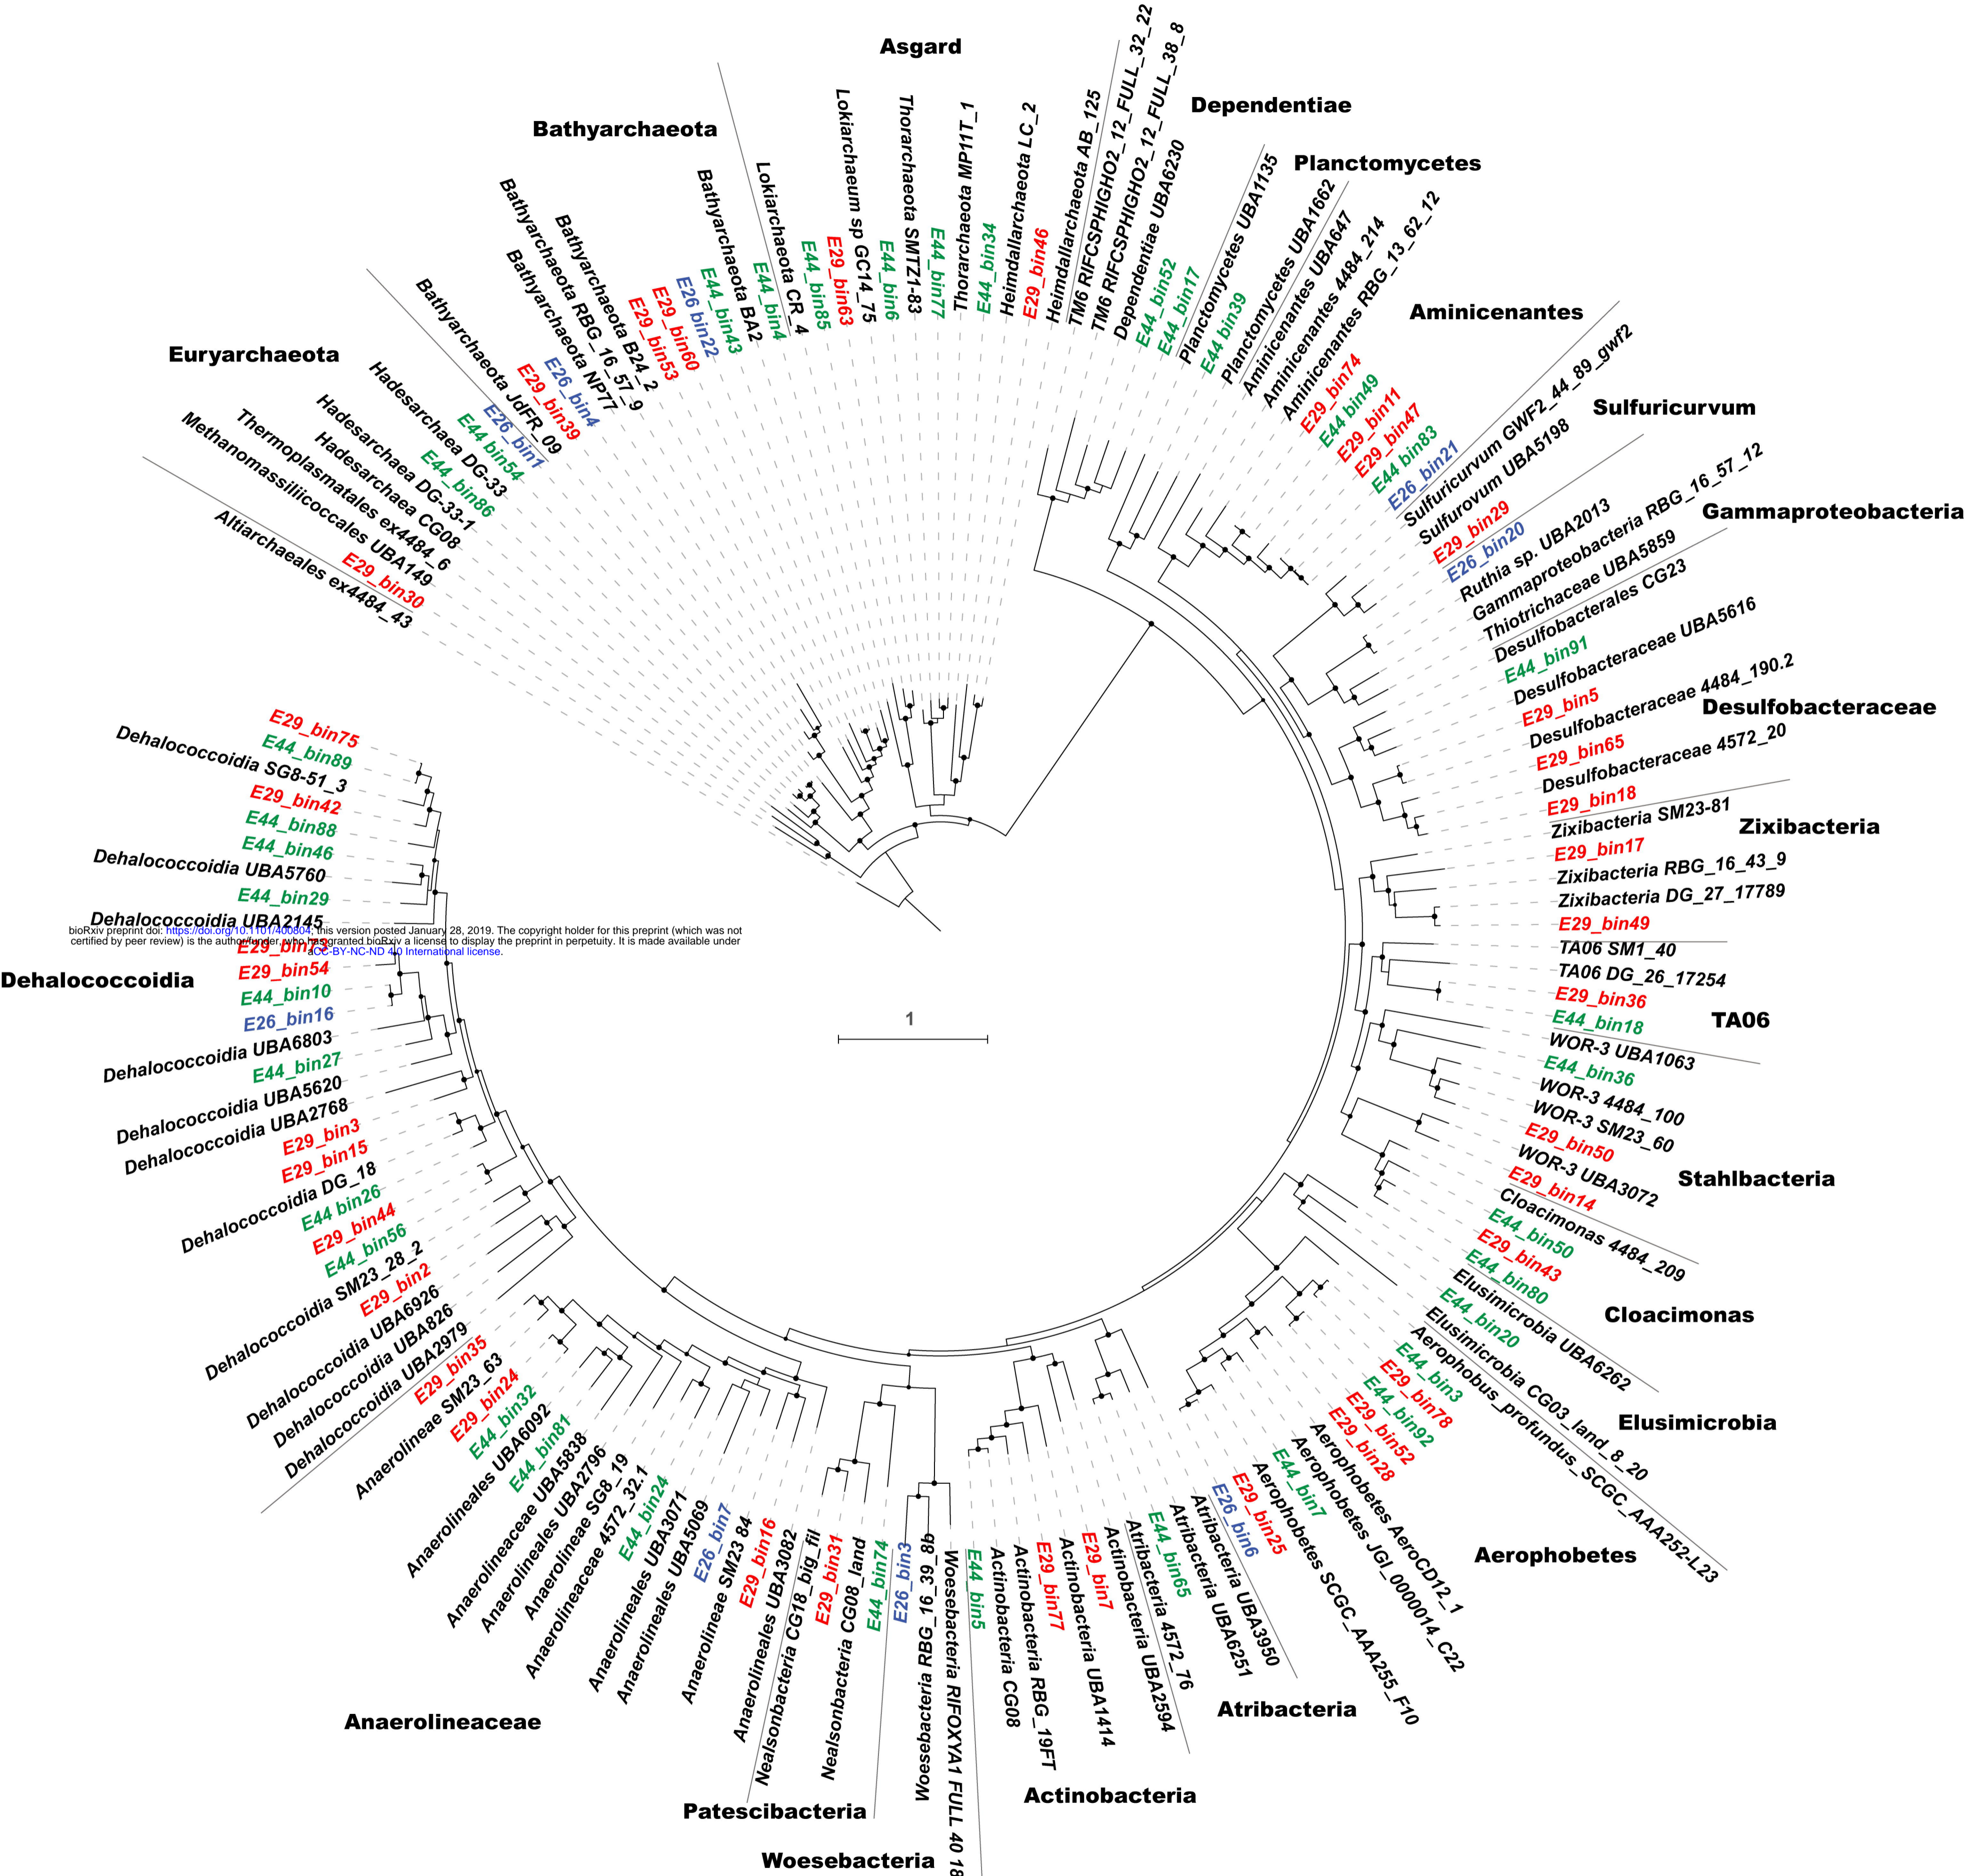

bioRxiv preprint doi: <https://doi.org/10.1101/400804>; this version posted January 28, 2019. The copyright holder for this preprint (which was not certified by peer review) is the author/funder, who has granted bioRxiv a license to display the preprint in perpetuity. It is made available under aCC-BY-NC-ND 4.0 International license.

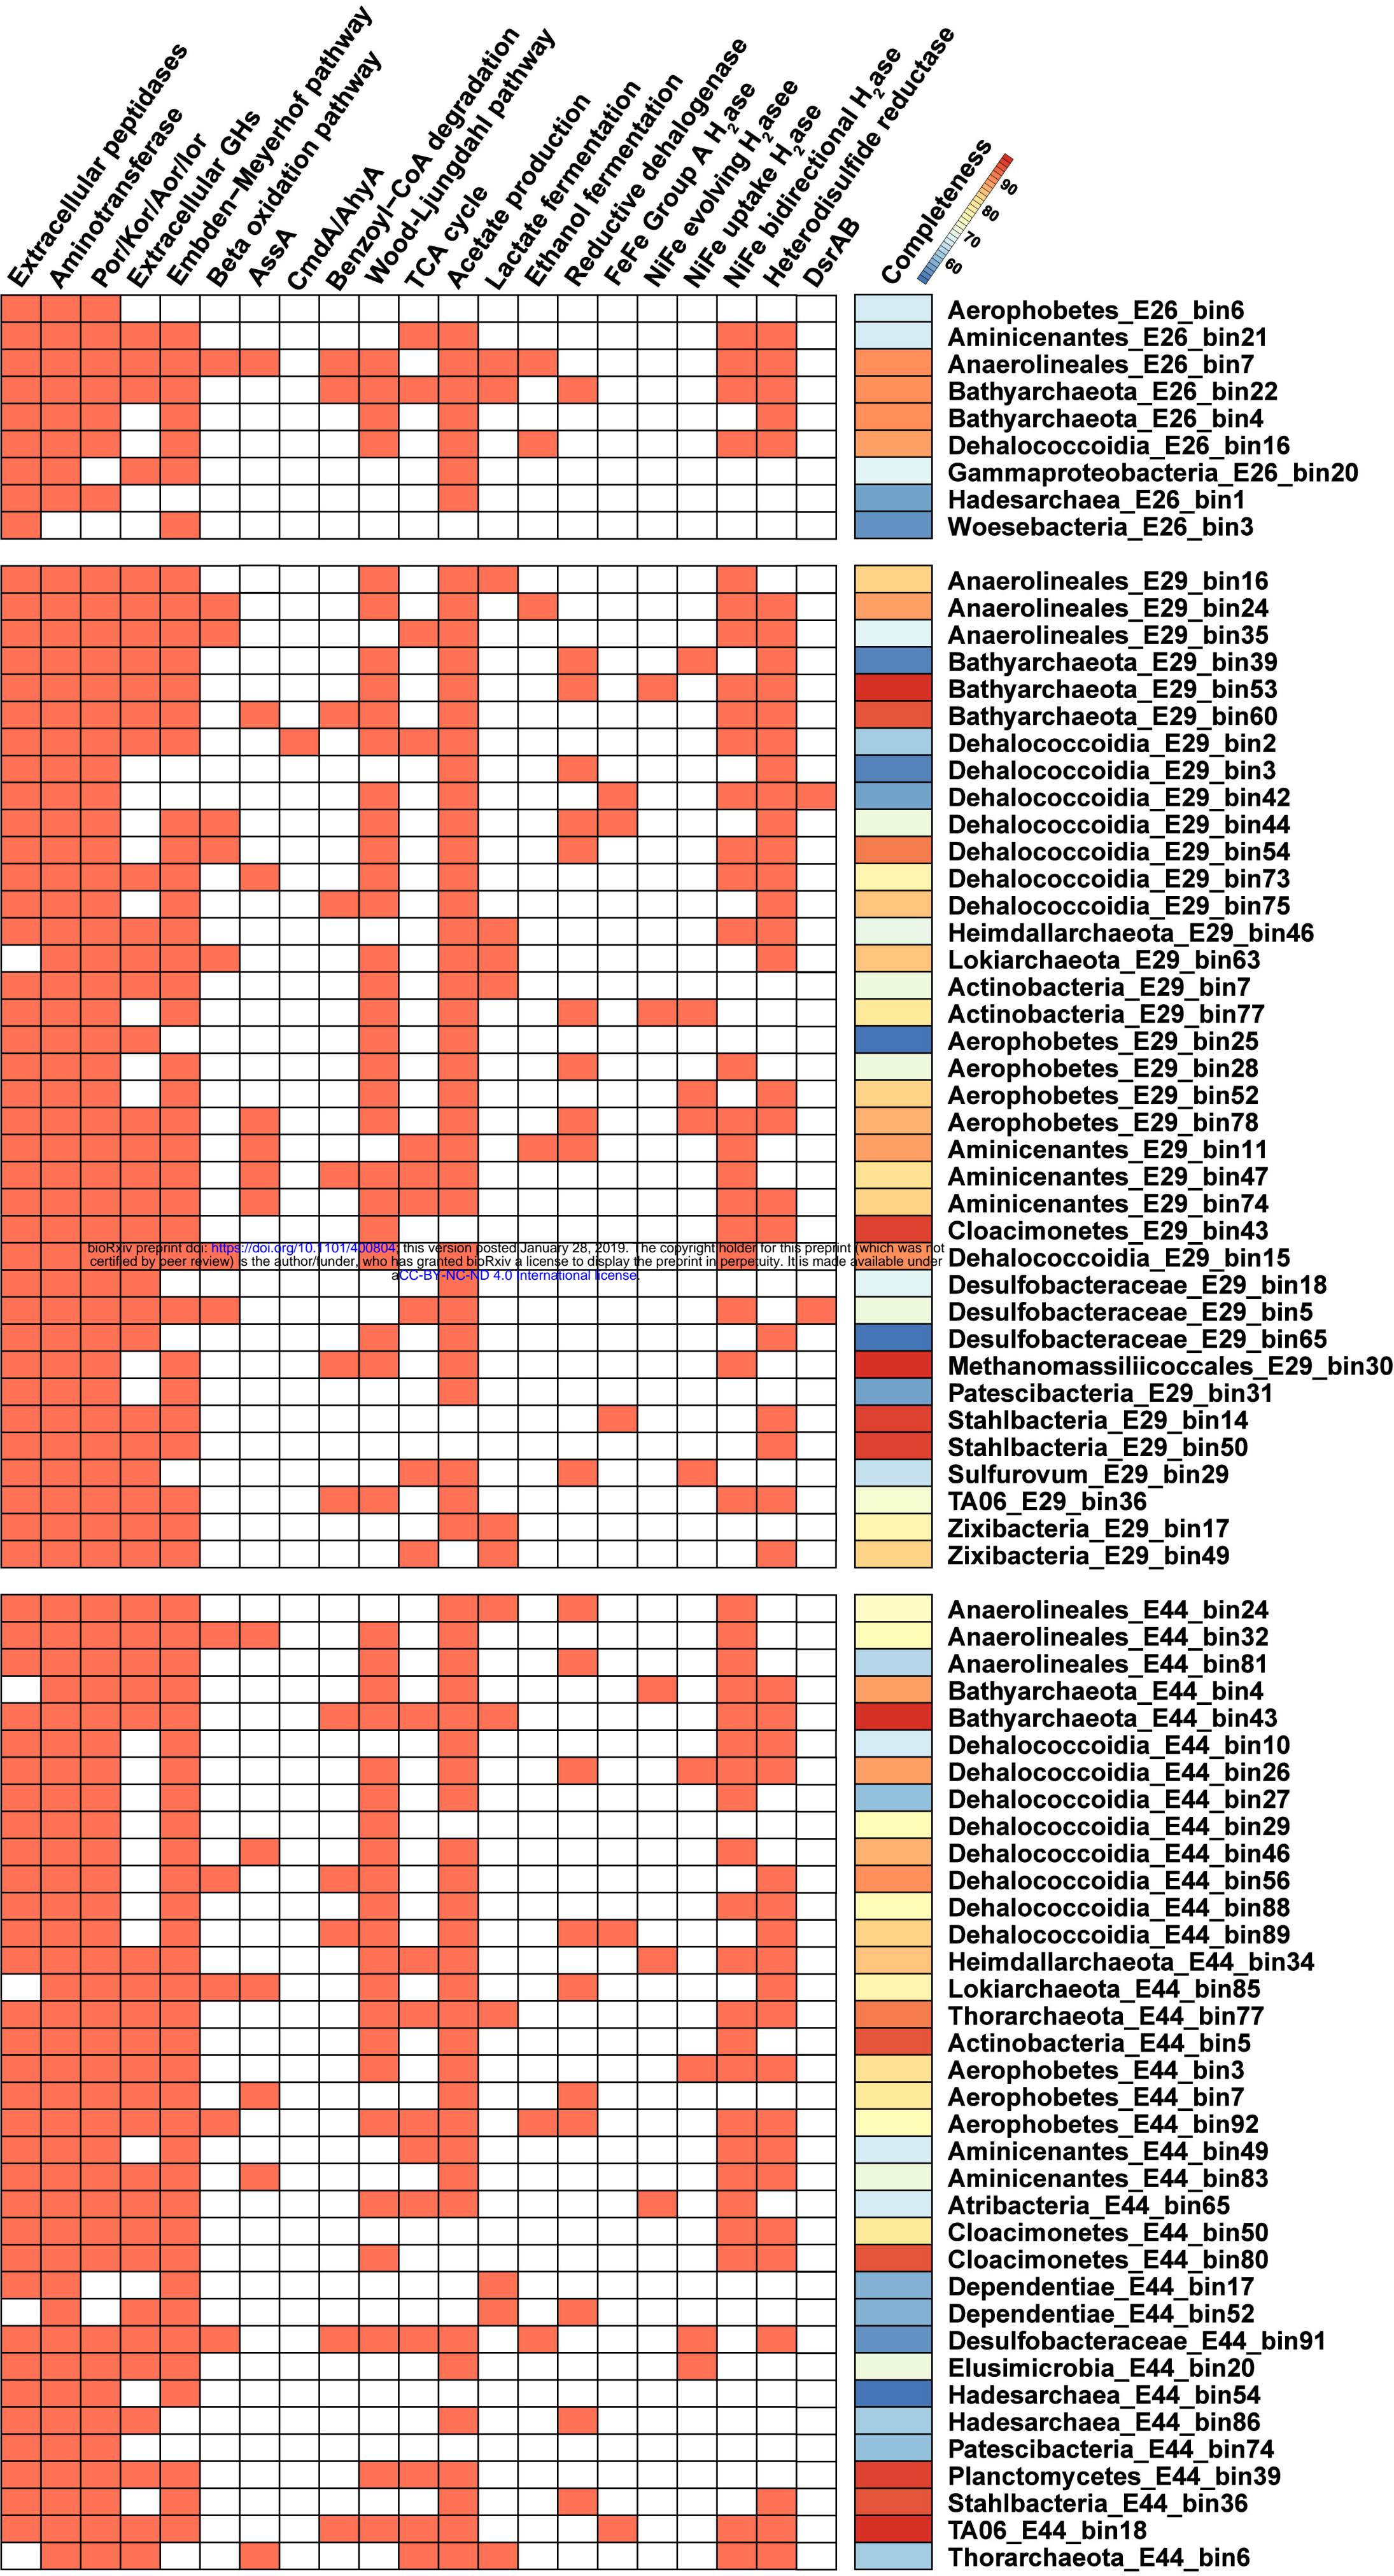

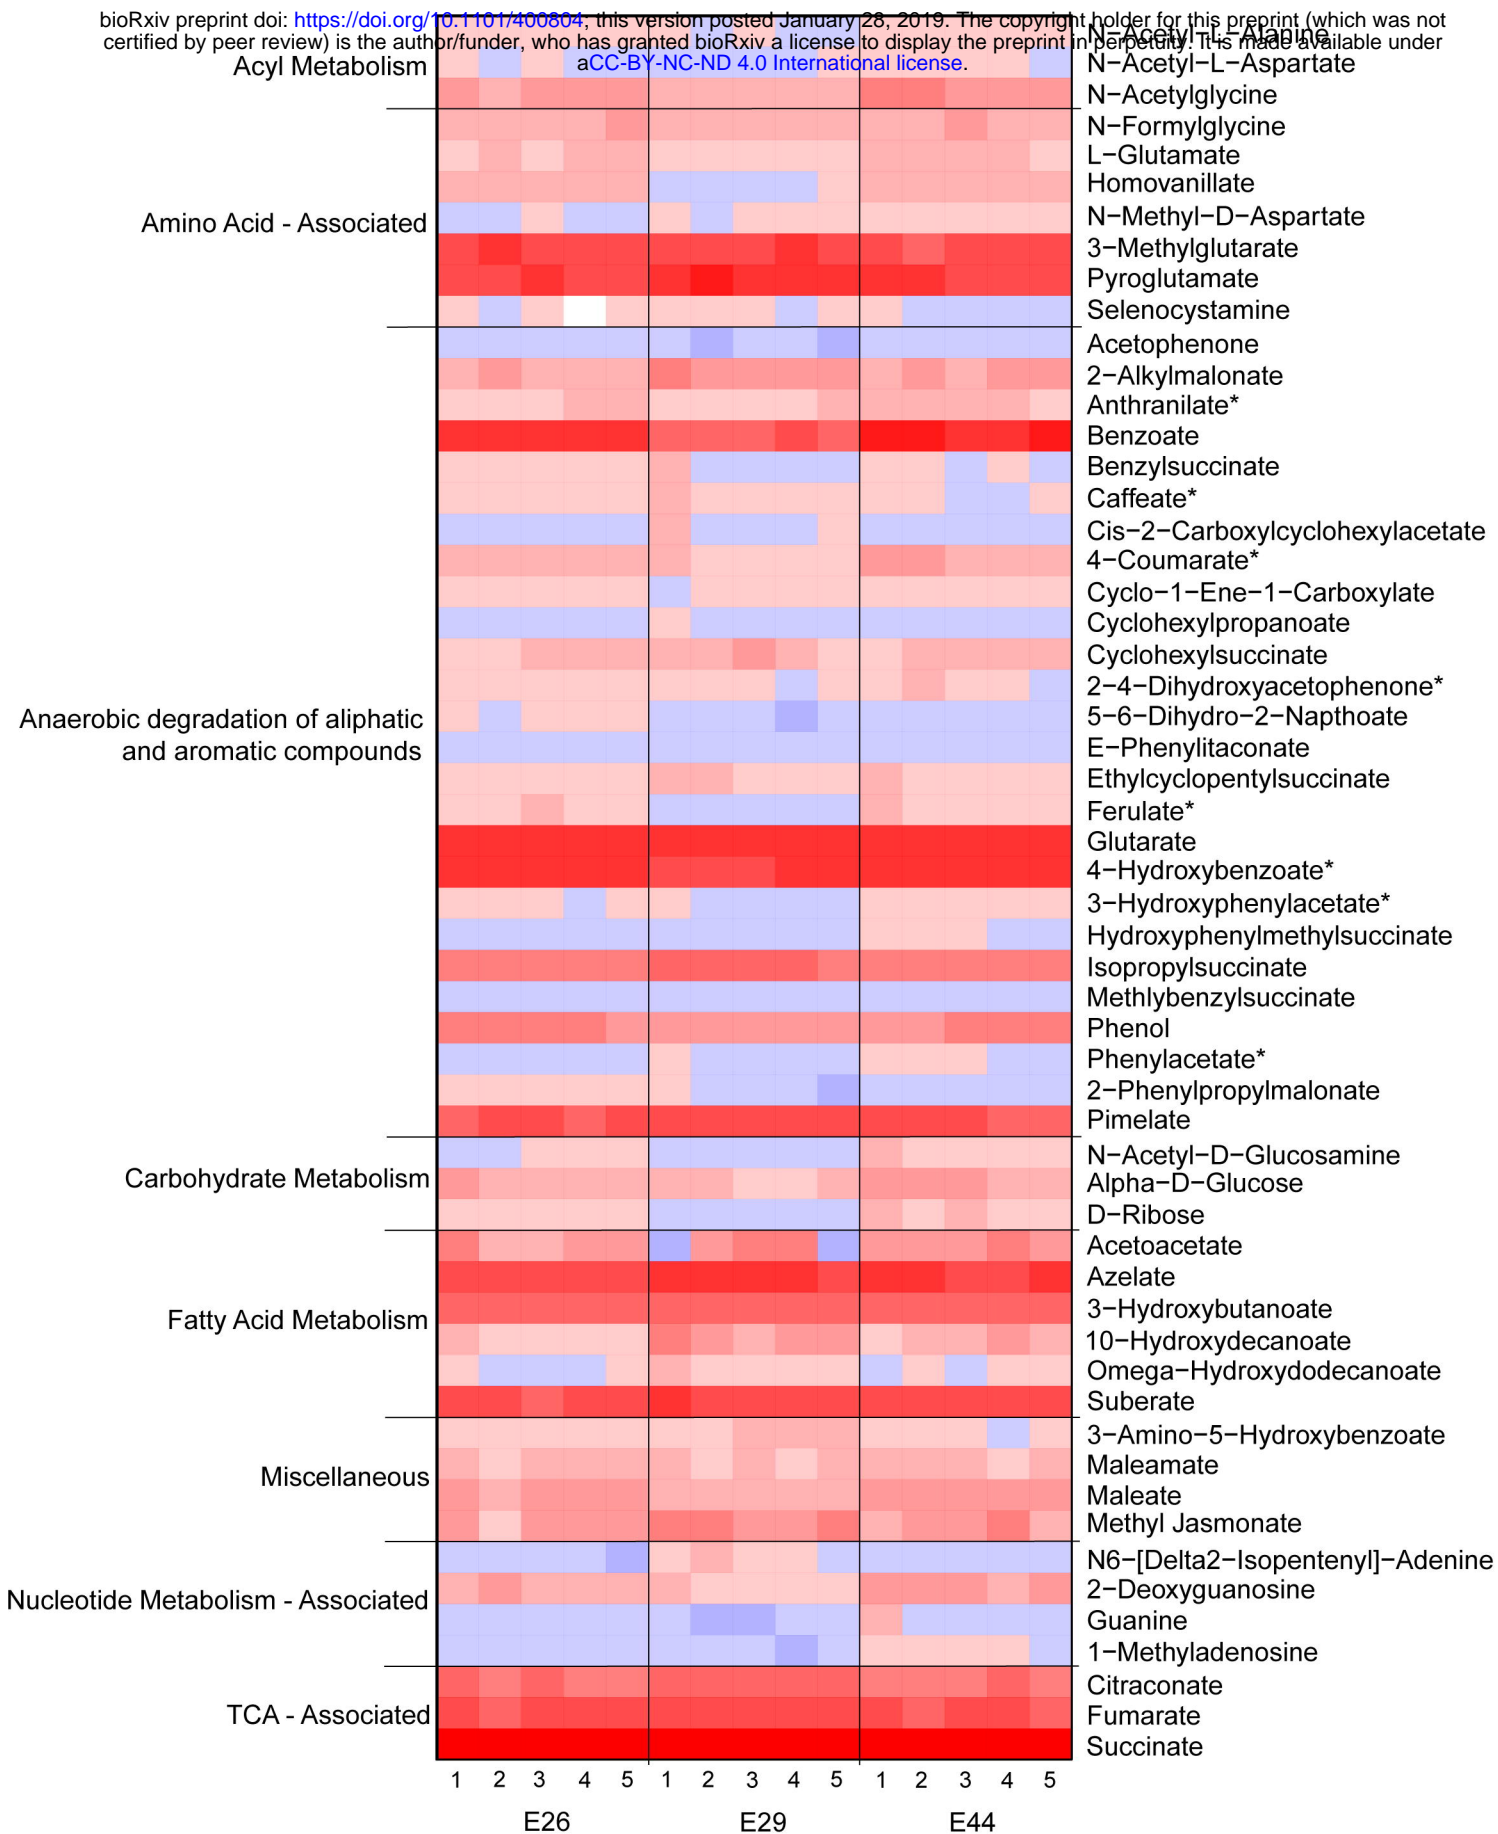

Colour Key: Log fractional abundance

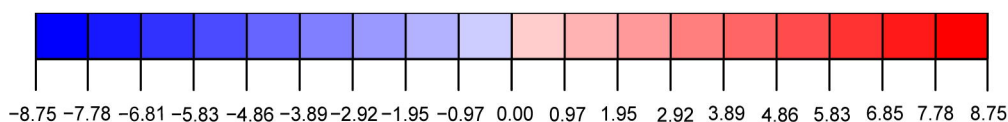



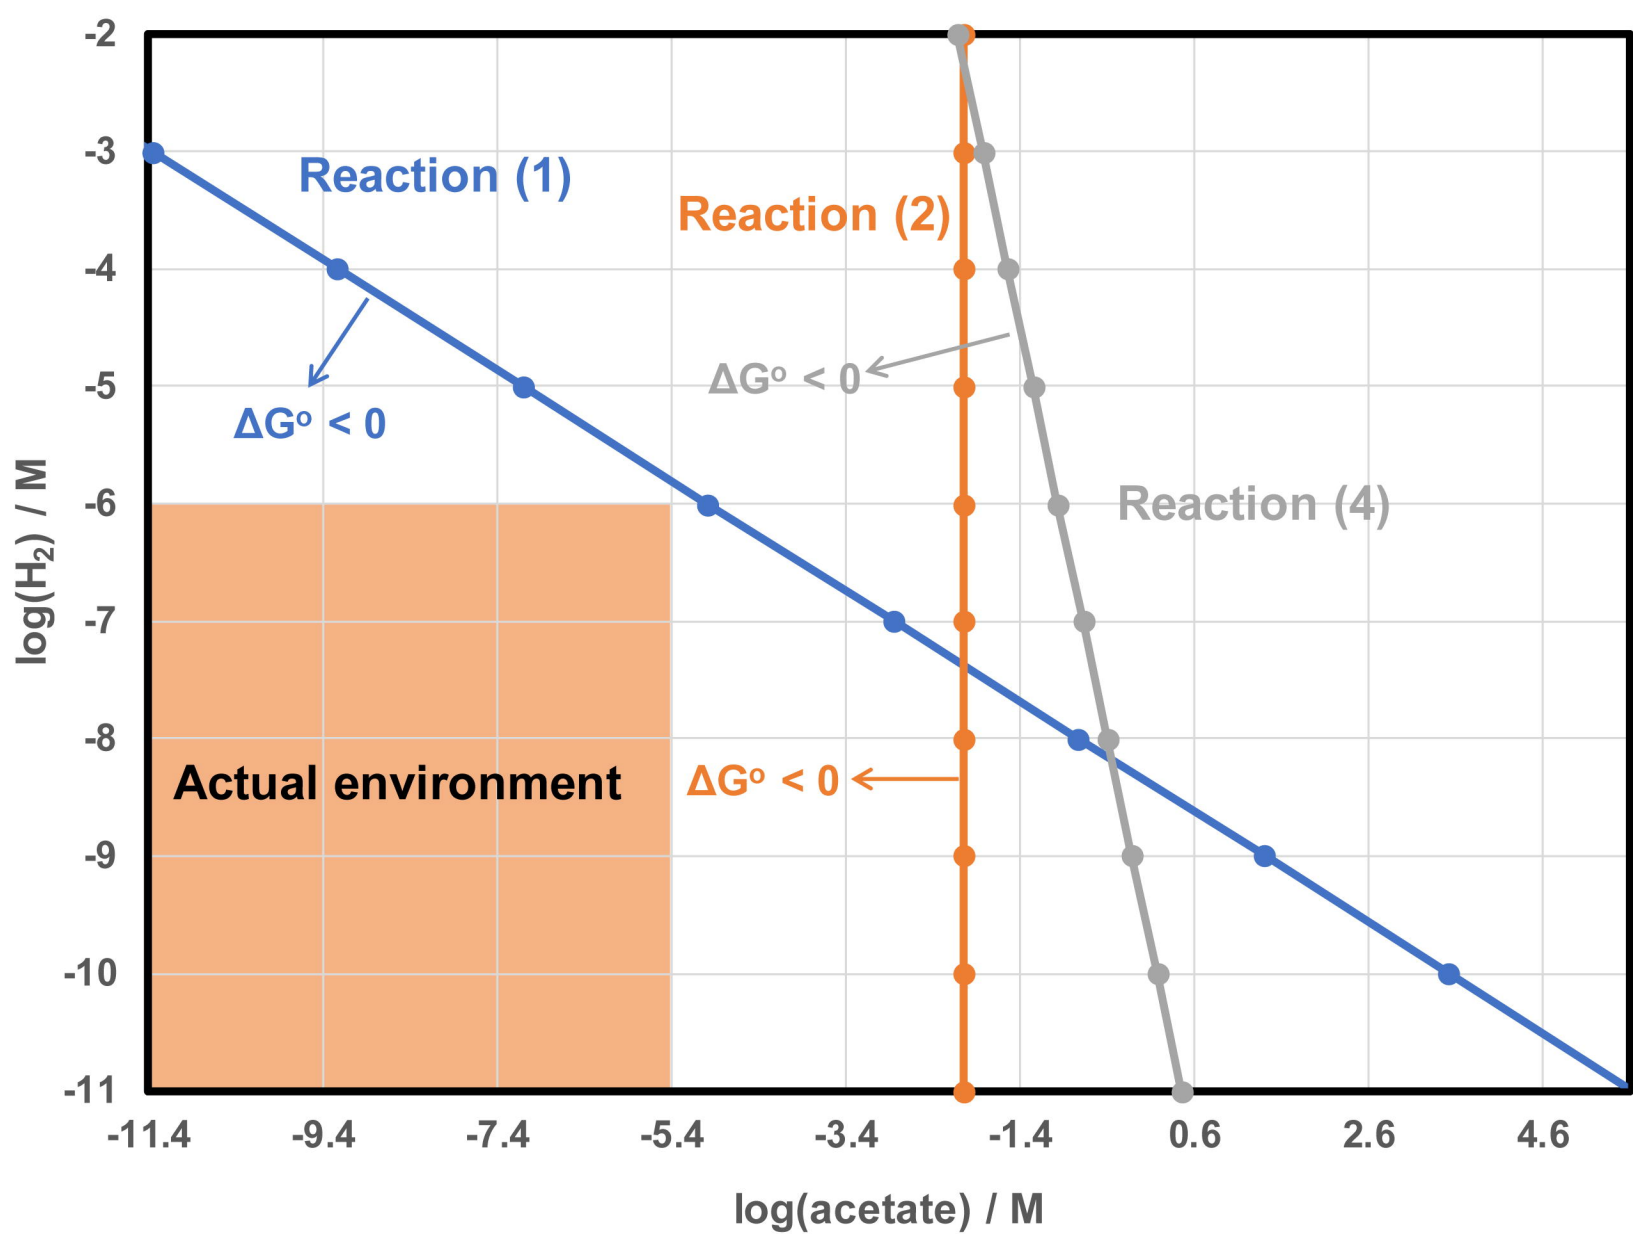

Source: https://www.biorxiv.org/content/10.1101/400804v3.full.pdf
