# Supplementary material for: Metabolic potential of uncultured bacteria and archaea associated with petroleum seepage in deep-sea sediments
Source: bioRxiv or medRxiv preprint supplement (doi:10.1101/400804), 2019-01-28
Supplement: Supplementary file [file media-1.pdf]

1 **Supplementary materials**

2 **Metabolic potential of uncultured bacteria and archaea associated with**  
3 **petroleum seepage in deep-sea sediments**

4 Xiyang Dong <sup>1,\*</sup>, Chris Greening <sup>2</sup>, Jayne E. Rattray <sup>1</sup>, Anirban Chakraborty <sup>1</sup>,

5 Maria Chuvochina <sup>2</sup>, Daisuke Mayumi <sup>1,3</sup>, Jan Dolfing <sup>4</sup>, Carmen Li <sup>1</sup>, James M. Brooks <sup>5</sup>,

6 Bernie B. Bernard <sup>5</sup>, Ryan A. Groves<sup>1</sup>, Ian A. Lewis <sup>1</sup>, Casey R.J. Hubert <sup>1,\*</sup>

7 <sup>1</sup> Department of Biological Sciences, University of Calgary, Calgary, T2N 1N4, Canada

8 <sup>2</sup> School of Biological Sciences, Monash University, Clayton, VIC 3800, Australia

9 <sup>3</sup> Institute for Geo-Resources and Environment, Geological Survey of Japan, National Institute of  
10 Advanced Industrial Science and Technology (AIST), 1-1-1 Higashi, Tsukuba, 305-8567, Japan

11 <sup>4</sup> School of Engineering, Newcastle University, Newcastle upon Tyne, NE1 7RU, United  
12 Kingdom

13 <sup>5</sup> TDI Brooks International, College Station, Texas, TX 77845, USA

14  
15 \* Corresponding authors. E-mail: [xiyang.dong@ucalgary.ca](mailto:xiyang.dong@ucalgary.ca) (X. Dong), [chubert@ucalgary.ca](mailto:chubert@ucalgary.ca) (C.  
16 R.J. Hubert).

|    |                                                                                                     |
|----|-----------------------------------------------------------------------------------------------------|
| 17 | <b>List of contents</b>                                                                             |
| 18 | <b>Supplementary Note 1</b>                                                                         |
| 19 | <b>Supplementary Note 2</b>                                                                         |
| 20 | <b>Supplementary Table 1</b> Sample metadata and shotgun sequencing results.                        |
| 21 | <b>Supplementary Table 2</b> Alpha diversity estimates based on 16S rRNA gene amplicon              |
| 22 | sequencing.                                                                                         |
| 23 | <b>Supplementary Table 3</b> Relative abundance data for 16S rRNA gene amplicon sequencing and      |
| 24 | metagenome sequencing.                                                                              |
| 25 | <b>Supplementary Table 4</b> Summary statistics for archaeal and bacterial MAGs.                    |
| 26 | <b>Supplementary Table 5</b> (1) GTDB-Tk classification of bins identified in this study as members |
| 27 | of TA06; (2) Summary statistics of potential TA06 genomes based on NCBI and GTDB.                   |
| 28 | <b>Supplementary Table 6</b> Functional analysis of archaeal and bacterial MAGs. Presence/absence   |
| 29 | of genes are listed as: Presence: >1 (red), Absence: 0 (no color).                                  |
| 30 | <b>Supplementary Table 7</b> Functional capacity based on normalized raw read count of genes        |
| 31 | (counts per million reads, CPM) encoding key metabolic enzymes.                                     |
| 32 | <b>Supplementary Table 8</b> Accession numbers for genes involved in anaerobic hydrocarbon          |
| 33 | degradation used as custom database.                                                                |

34 **Supplementary Figure 1** Map of the Eastern Gulf of Mexico (GoM) showing the studied three  
35 sampling locations (E26, E29 and E44) and bathymetry of the study area.

36 **Supplementary Figure 2** Phylum-level community composition of classified bacterial (left) and  
37 archaeal (right) 16S rRNA gene reads from separate bacterial and archaeal amplicon libraries.  
38 Detailed numbers can be found in Supplementary Table 3.

39 **Supplementary Figure 3** Phylogenetic relationship of putative glycy radical enzymes in MAGs  
40 with those of alkyl-/arylalkylsuccinate synthases. Reference sequences show canonical alkane  
41 succinate synthase (AssA), 4-hydroxybenzyl succinate synthase (HbsA), benzyl succinate  
42 synthase (BssA), and homologous putative alkane-degrading enzymes from *Vallitalea*  
43 *guaymasensis* L81 and *Archaeoglobus fulgidus* VC-16. The tree was constructed with the  
44 maximum-likelihood method (Poisson correction model) and is bootstrapped with 50 replicates.  
45 Sequences of pyruvate formate lyase (Pfl) from *E. coli* were used as an outgroup (not shown).

46 **Supplementary Figure 4** Phylogenetic relationship of identified genes in MAGs with currently-  
47 known molybdenum cofactor-containing hydrocarbon dehydrogenases. Reference sequences  
48 show the catalytic subunits of characterized cymene dehydrogenase (CmdA), alkane C<sub>2</sub>-  
49 methylene hydroxylase (AhyA), and ethylbenzene dehydrogenase (EbdA/EbdA2) enzymes from  
50 other hydrocarbon-degrading bacteria. The tree was constructed with the maximum-likelihood  
51 method (Poisson correction model) and is bootstrapped with 50 replicates. Sequences of  
52 perchlorate reductase (PcrA) from *Dechloromonas aromatica* RCB were used as an outgroup  
53 (not shown).

54 **Supplementary Figure 5** Protein presence/absence matrix for benzoyl-CoA anaerobic  
55 biodegradation pathway. The MAGs were shown only if it was at least partially complete  
56 (presence of at least three subunits within one cluster for BcrABCD). Presence of genes is  
57 indicated by blue boxes. Gene names: Bcr, benzoyl-CoA reductase; Oah, 6-oxo-cyclohex-1-ene-  
58 carbonyl-CoA hydrolase; Dch, cyclohex-1,5-dienecarbonyl-CoA hydratase; Had, 6-  
59 hydroxycyclohex-1-ene-1-carbonyl-CoA dehydrogenases. More details about these functional  
60 genes and pathways can be found in the text and in Supplementary Table 6.

61 **Supplementary Figure 6** Protein presence/absence matrix for reductive acetyl-CoA (Wood-  
62 Ljungdahl) pathway. Presence of genes is indicated by blue boxes. Columns correspond to the  
63 following enzymes: 1, formate dehydrogenase (Fhd) / formylmethanofuran dehydrogenase (Fwd);  
64 2, formate-tetrahydrofolate synthetase (Fhs) / formylmethanofuran:tetrahydromethanopterin  
65 formyltransferase (Ftr); 3, methylene-tetrahydrofolate dehydrogenase (FolD) / N5,N10-  
66 methenyltetrahydromethanopterin cyclohydrolase (Mch); 4, methylene-tetrahydrofolate  
67 dehydrogenase (FolD) / methylenetetrahydromethanopterin dehydrogenase (Mtd); 5,  
68 methylenetetrahydrofolate reductase (Met) / N5,N10-methylenetetrahydromethanopterin  
69 reductase (Mer), 6, acetyl-CoA synthetase (Acs), 7 carbon monoxide dehydrogenase (Cdh).

70 **Supplementary Data 1** Genome sequences used for inferring Figure 2. It can be found at  
71 <https://figshare.com/s/355963dc21a263e34c1f>.

72 **Supplementary References**

73 **Supplementary Note 1**

74 Among all identified phyla, candidate phylum TA06 is the only one not yet given provisional  
75 names. Also known as GN04 or AC1, it was originally discovered in a hypersaline microbial mat  
76 <sup>1</sup>. First genomic representatives of this phylum were recovered from estuarine sediments <sup>2</sup> with a  
77 small number of other MAGs recently reported to belong to this lineage <sup>3,4</sup>. Due to the paucity of  
78 available MAGs and misclassifications based on 16S rRNA gene sequences, members of TA06  
79 are often ‘confused’ with members of the phylum WOR-3 (*Stahlbacteria*) <sup>4</sup>. In addition to the  
80 phylogenetic inference here based on 43 concatenated protein marker genes (Figure 2), the  
81 placement of two bins within the original TA06 phylum is further supported by genome  
82 classification based on concatenation of 120 ubiquitous, single-copy marker genes <sup>5</sup> as well as  
83 classification of 16S rRNA genes using the SILVA database <sup>6</sup> (Supplementary Tables 4 and 5).

84 **Supplementary Note 2**

85 We performed a geochemical analysis of sediment porewater extracts. High concentrations of  
86 sulfate (Site E26: 16.55 mM; Site E29: 27.23 mM; Site E44: 25.63 mM) were detected at each of  
87 the three sites, consistent with sulfate being 28 mM in seawater and diffusing into sediments  
88 where it is consumed by sulfate reduction under anoxic conditions. H<sub>2</sub> and acetate concentrations  
89 were both below limits of detection (1 μM and 2.5 μM, respectively); this is consistent with  
90 previous observations in deep-sea sediments showing that H<sub>2</sub> and acetate are present at low  
91 steady-state concentrations due to tight coupling between producers and consumers<sup>7,8</sup>.

92 **Supplementary Table 1 Sample metadata and shotgun sequencing results.**

| <b><i>ID</i></b>                     | <b><i>Site E26</i></b> | <b><i>Site E29</i></b> | <b><i>Site E44</i></b> |
|--------------------------------------|------------------------|------------------------|------------------------|
| <b><i>Latitude (N)</i></b>           | 26.59                  | 27.43                  | 26.28                  |
| <b><i>Longitude (W)</i></b>          | 87.51                  | 86.01                  | 86.81                  |
| <b><i>Geographic region</i></b>      | Henderson and Lund     | Lloyd Ridge            | Henderson and Lund     |
| <b><i>Water depth (km)</i></b>       | 2.8                    | 3.2                    | 3.0                    |
| <b><i>Quality-filtered reads</i></b> | 85 825 930             | 148 908 270            | 138 795 692            |
| <b><i>Contigs (&gt; 500 bp)</i></b>  | 168 069                | 700 804                | 695 891                |
| <b><i>Total size (bp)</i></b>        | 149 863 977            | 738 738 047            | 755 473 006            |
| <b><i>Max contig (bp)</i></b>        | 52 576                 | 191 288                | 346 360                |
| <b><i>Average length (bp)</i></b>    | 891                    | 1 054                  | 1 085                  |
| <b><i>Curated MAGs</i></b>           | 9                      | 37                     | 36                     |

93 **Supplementary Table 2 Alpha diversity estimates based on 16S rRNA amplicon sequencing.**

94

| Locations                                     | <i>Richness Estimates</i> |           |           | <i>Diversity Indices</i> |         |                  |        |
|-----------------------------------------------|---------------------------|-----------|-----------|--------------------------|---------|------------------|--------|
|                                               | Observed                  | Chao1     | ACE       | Shannon                  | Simpson | Inversed Simpson | Fisher |
| <b>16S amplicons of bacterial communities</b> |                           |           |           |                          |         |                  |        |
| Site E26                                      | 345                       | 359 ± 7   | 356 ± 9   | 5.15                     | 0.99    | 83.2             | 84.6   |
| Site E29                                      | 1055                      | 1374 ± 41 | 1483 ± 21 | 5.97                     | 0.99    | 135.9            | 412.4  |
| Site E44                                      | 348                       | 360 ± 6   | 355 ± 9   | 5.28                     | 0.99    | 100.8            | 85.6   |
| <b>16S amplicons of archaeal communities</b>  |                           |           |           |                          |         |                  |        |
| Site E26                                      | 192                       | 195 ± 3   | 196 ± 7   | 4.22                     | 0.96    | 23.3             | 43.7   |
| Site E29                                      | 178                       | 180 ± 2   | 181 ± 7   | 4.33                     | 0.97    | 30.4             | 39.7   |
| Site E44                                      | 220                       | 247 ± 12  | 241 ± 7   | 4.21                     | 0.96    | 25.6             | 52.2   |

95



96 **Supplementary Table 7 Functional capacity of sediments based on normalized raw read**  
 97 **count of genes (counts per million reads, CPM) encoding key metabolic enzymes.**

| <b>ID</b>                    | <b>Site E26</b> | <b>site E29</b> | <b>Site E44</b> |
|------------------------------|-----------------|-----------------|-----------------|
| <b><i>assA-like</i></b>      | 233             | 394             | 346             |
| <b><i>canonical assA</i></b> | 9               | 37              | 10              |
| <b><i>nmsA</i></b>           | 0               | 0               | 0               |
| <b><i>bssA</i></b>           | 2               | 4               | 2               |
| <b><i>acsB</i></b>           | 1485            | 2819            | 2474            |
| <b><i>dsrA</i></b>           | 357             | 603             | 548             |
| <b><i>FeFe</i></b>           | 332             | 380             | 335             |
| <b><i>NiFe Group 1</i></b>   | 416             | 431             | 296             |
| <b><i>NiFe Group 2</i></b>   | 55              | 5               | 23              |
| <b><i>NiFe Group 3</i></b>   | 538             | 766             | 683             |
| <b><i>NiFe Group 4</i></b>   | 73              | 99              | 92              |
| <b><i>Fe</i></b>             | 0               | 0               | 0               |

98 **Supplementary Figure 1** Map of the Eastern Gulf of Mexico (GoM) showing the studied three  
99 sampling locations (E26, E29 and E44) and bathymetry of the study area.

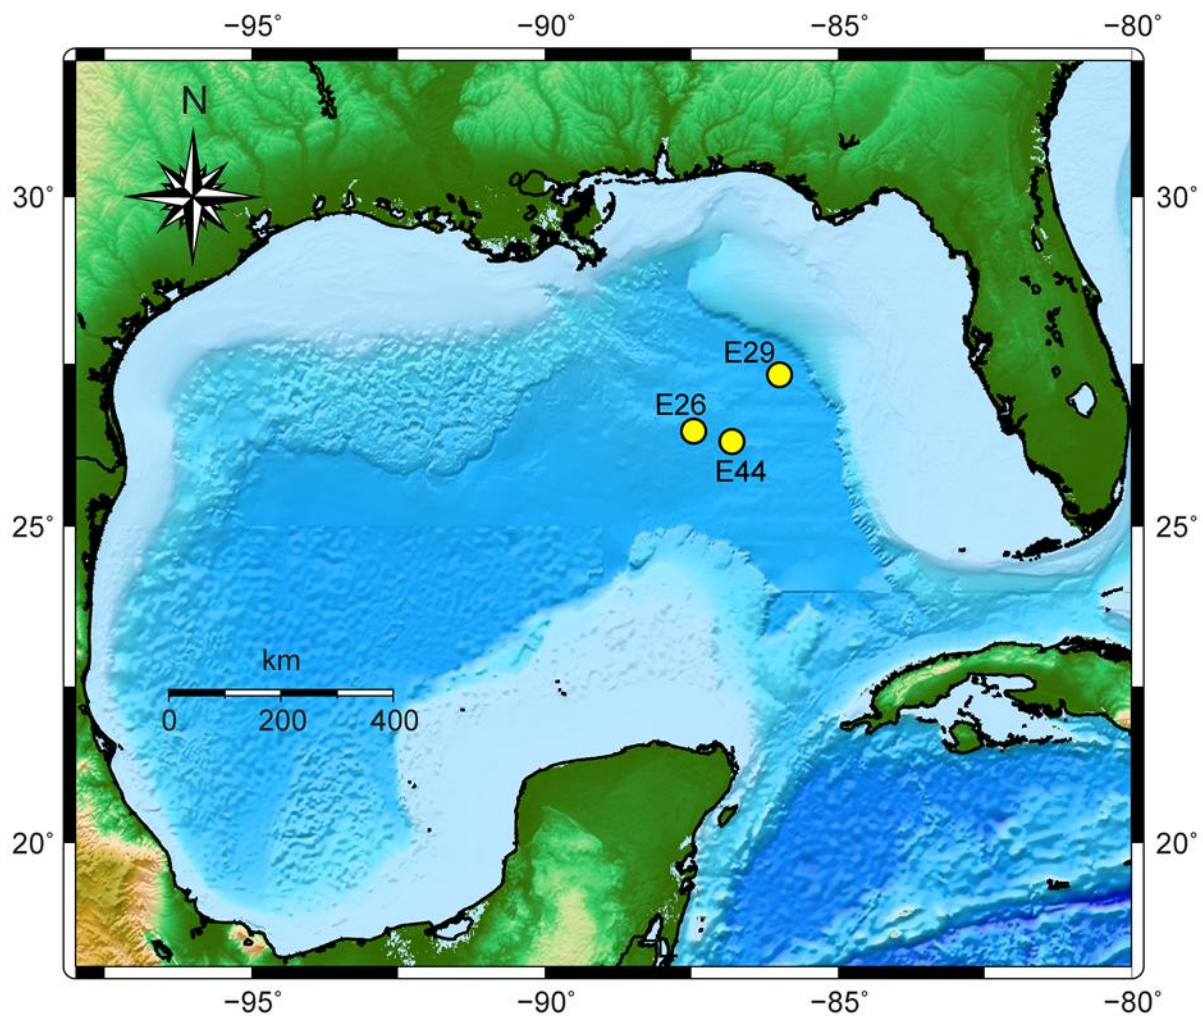

100

101 **Supplementary Figure 2** Phylum-level community composition of classified bacterial (left) and  
 102 archaeal (right) 16S rRNA gene reads from separate bacterial and archaeal amplicon libraries.

103 Detailed numbers can be found in Supplementary Table 3.

104

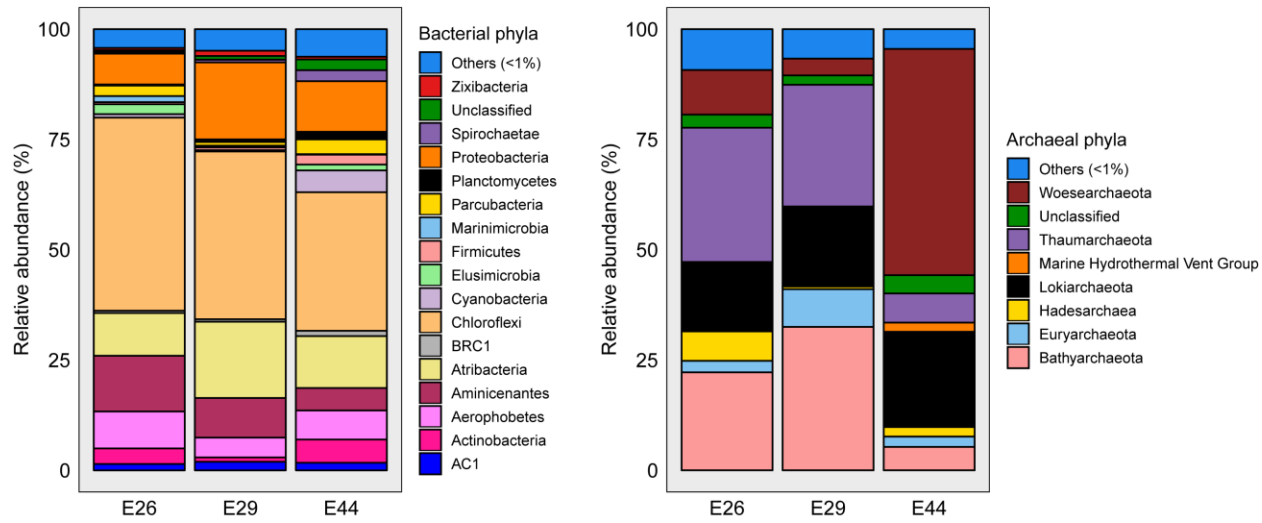

105

106 **Supplementary Figure 3** Phylogenetic relationship of putative glyceryl-radical enzymes in MAGs  
 107 with those of alkyl-/arylalkylsuccinate synthases. Reference sequences show canonical alkane  
 108 succinate synthase (AssA), 4-hydroxybenzyl succinate synthase (HbsA), benzyl succinate  
 109 synthase (BssA), and homologous putative alkane-degrading enzymes from *Vallitalea*  
 110 *guaymasensis* L81 and *Archaeoglobus fulgidus* VC-16. The tree was constructed with the  
 111 maximum-likelihood method (Poisson correction model) and is bootstrapped with 50 replicates.  
 112 Sequences of pyruvate formate lyase (Pfl) from *E. coli* were used as an outgroup (not shown).

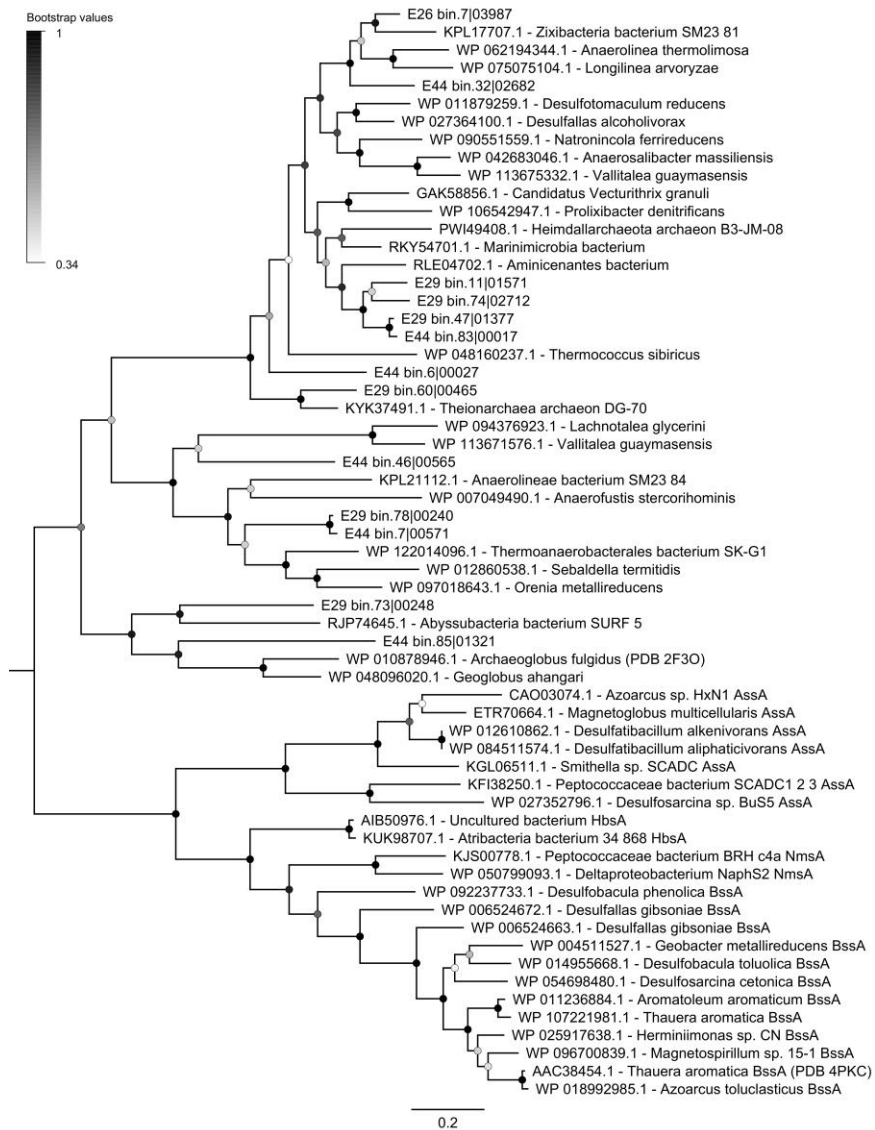

113

114 **Supplementary Figure 4** Phylogenetic relationship of identified genes in MAGs with currently-  
 115 known molybdenum cofactor-containing hydrocarbon dehydrogenases. Reference sequences  
 116 show the catalytic subunits of characterized cymene dehydrogenase (CmdA), alkane C<sub>2</sub>-  
 117 methylene hydroxylase (AhyA), and ethylbenzene dehydrogenase (EbdA/EbdA2) enzymes from  
 118 other hydrocarbon-degrading bacteria. The tree was constructed with the maximum-likelihood  
 119 method (Poisson correction model) and is bootstrapped with 50 replicates. Sequences of  
 120 perchlorate reductase (PcrA) from *Dechloromonas aromatica* RCB were used as an outgroup  
 121 (not shown).

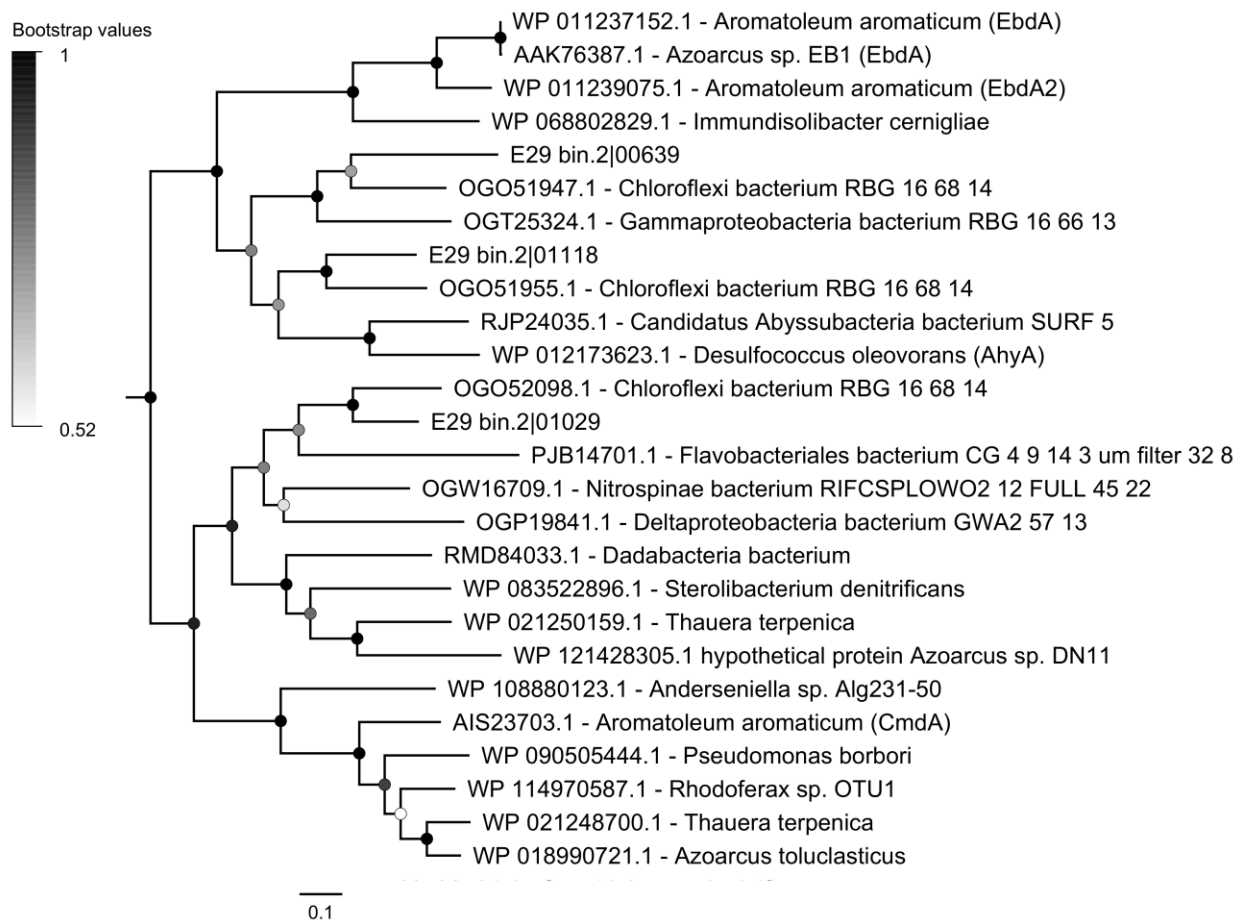

122

123 **Supplementary Figure 5** Protein presence/absence matrix for benzoyl-CoA anaerobic  
 124 biodegradation pathway. The MAGs were shown only if it was at least partially complete  
 125 (presence of at least three subunits within one cluster for BcrABCD). Presence of genes  
 126 is indicated by blue boxes. Gene names: Bcr, benzoyl-CoA reductase; Oah, 6-oxo-cyclohex-1-  
 127 ene-carbonyl-CoA hydrolase; Dch, cyclohex-1,5-dienecarbonyl-CoA hydratase; Had, 6-  
 128 hydroxycyclohex-1-ene-1-carbonyl-CoA dehydrogenases. More details about these functional  
 129 genes and pathways can be found in the text and in Supplementary Table 6.

| Bin No.   | Lineage                   | Bcr  | Dch  | Had  | Oah  |
|-----------|---------------------------|------|------|------|------|
| E29_bin47 | <i>Aminicenantes</i>      | Blue | Blue | Blue | Blue |
| E26_bin7  | <i>Anaerolineales</i>     | Blue | Blue | Blue | Blue |
| E29_bin75 | <i>Dehalococcoidia</i>    | Blue | Grey | Blue | Grey |
| E44_bin56 | <i>Dehalococcoidia</i>    | Blue | Blue | Grey | Grey |
| E44_bin89 | <i>Dehalococcoidia</i>    | Blue | Grey | Blue | Grey |
| E44_bin91 | <i>Desulfobacteraceae</i> | Blue | Blue | Grey | Grey |
| E29_bin36 | TA06                      | Blue | Blue | Blue | Grey |
| E44_bin18 | TA06                      | Blue | Blue | Blue | Blue |
| E26_bin22 | <i>Bathyarchaeota</i>     | Blue | Blue | Blue | Blue |
| E29_bin60 | <i>Bathyarchaeota</i>     | Blue | Blue | Blue | Blue |
| E44_bin43 | <i>Bathyarchaeota</i>     | Blue | Blue | Blue | Blue |
| E29_bin30 | <i>Thermoplasmata</i>     | Blue | Grey | Blue | Blue |

130

131

132 **Supplementary Figure 6** Protein presence/absence matrix for reductive acetyl-CoA (Wood-  
133 Ljungdahl) pathway. Presence of genes is indicated by blue boxes. Columns correspond to the  
134 following enzymes: 1, formate dehydrogenase (Fhd) / formylmethanofuran dehydrogenase (Fwd);  
135 2, formate-tetrahydrofolate synthetase (Fhs) / formylmethanofuran:tetrahydromethanopterin  
136 formyltransferase (Ftr); 3, methylene-tetrahydrofolate dehydrogenase (FolD) / N5,N10-  
137 methenyltetrahydromethanopterin cyclohydrolase (Mch); 4, methylene-tetrahydrofolate  
138 dehydrogenase (FolD) / methylenetetrahydromethanopterin dehydrogenase (Mtd); 5,  
139 methylenetetrahydrofolate reductase (Met) / N5,N10-methylenetetrahydromethanopterin  
140 reductase (Mer), 6, acetyl-CoA synthetase (Acs), 7 carbon monoxide dehydrogenase (Cdh).

| Bin No.   | Lineage                   | Fhd Fwd | Fhs Ftr | FoID Mch | FoID Mtd | Met Mer | Acs | Cdh |
|-----------|---------------------------|---------|---------|----------|----------|---------|-----|-----|
| E29_bin7  | <i>Actinobacteria</i>     |         |         |          |          |         |     |     |
| E29_bin77 | <i>Actinobacteria</i>     |         |         |          |          |         |     |     |
| E44_bin5  | <i>Actinobacteria</i>     |         |         |          |          |         |     |     |
| E29_bin28 | <i>Aerophobetes</i>       |         |         |          |          |         |     |     |
| E29_bin52 | <i>Aerophobetes</i>       |         |         |          |          |         |     |     |
| E29_bin78 | <i>Aerophobetes</i>       |         |         |          |          |         |     |     |
| E44_bin3  | <i>Aerophobetes</i>       |         |         |          |          |         |     |     |
| E44_bin92 | <i>Aerophobetes</i>       |         |         |          |          |         |     |     |
| E29_bin47 | <i>Aminicenantes</i>      |         |         |          |          |         |     |     |
| E29_bin74 | <i>Aminicenantes</i>      |         |         |          |          |         |     |     |
| E44_bin65 | <i>Atribacteria</i>       |         |         |          |          |         |     |     |
| E26_bin7  | <i>Anaerolineales</i>     |         |         |          |          |         |     |     |
| E29_bin16 | <i>Anaerolineales</i>     |         |         |          |          |         |     |     |
| E29_bin24 | <i>Anaerolineales</i>     |         |         |          |          |         |     |     |
| E44_bin32 | <i>Anaerolineales</i>     |         |         |          |          |         |     |     |
| E44_bin81 | <i>Anaerolineales</i>     |         |         |          |          |         |     |     |
| E25_bin16 | <i>Dehalococcoidia</i>    |         |         |          |          |         |     |     |
| E29_bin15 | <i>Dehalococcoidia</i>    |         |         |          |          |         |     |     |
| E29_bin2  | <i>Dehalococcoidia</i>    |         |         |          |          |         |     |     |
| E29_bin42 | <i>Dehalococcoidia</i>    |         |         |          |          |         |     |     |
| E29_bin44 | <i>Dehalococcoidia</i>    |         |         |          |          |         |     |     |
| E29_bin54 | <i>Dehalococcoidia</i>    |         |         |          |          |         |     |     |
| E29_bin73 | <i>Dehalococcoidia</i>    |         |         |          |          |         |     |     |
| E29_bin75 | <i>Dehalococcoidia</i>    |         |         |          |          |         |     |     |
| E44_bin26 | <i>Dehalococcoidia</i>    |         |         |          |          |         |     |     |
| E44_bin27 | <i>Dehalococcoidia</i>    |         |         |          |          |         |     |     |
| E44_bin29 | <i>Dehalococcoidia</i>    |         |         |          |          |         |     |     |
| E44_bin46 | <i>Dehalococcoidia</i>    |         |         |          |          |         |     |     |
| E44_bin56 | <i>Dehalococcoidia</i>    |         |         |          |          |         |     |     |
| E44_bin88 | <i>Dehalococcoidia</i>    |         |         |          |          |         |     |     |
| E44_bin89 | <i>Dehalococcoidia</i>    |         |         |          |          |         |     |     |
| E29_bin43 | <i>Cloacimonetes</i>      |         |         |          |          |         |     |     |
| E44_bin80 | <i>Cloacimonetes</i>      |         |         |          |          |         |     |     |
| E29_bin65 | <i>Desulfobacteraceae</i> |         |         |          |          |         |     |     |
| E44_bin91 | <i>Desulfobacteraceae</i> |         |         |          |          |         |     |     |
| E44_bin39 | <i>Planctomycetes</i>     |         |         |          |          |         |     |     |
| E29_bin36 | TA06                      |         |         |          |          |         |     |     |
| E44_bin18 | TA06                      |         |         |          |          |         |     |     |
| E44_bin34 | <i>Heimdallarchaeota</i>  |         |         |          |          |         |     |     |
| E29_bin63 | <i>Lokiarchaeota</i>      |         |         |          |          |         |     |     |
| E44_bin85 | <i>Lokiarchaeota</i>      |         |         |          |          |         |     |     |
| E44_bin77 | <i>Thorarchaeota</i>      |         |         |          |          |         |     |     |
| E26_bin22 | <i>Bathyarchaeota</i>     |         |         |          |          |         |     |     |
| E26_bin4  | <i>Bathyarchaeota</i>     |         |         |          |          |         |     |     |
| E29_bin39 | <i>Bathyarchaeota</i>     |         |         |          |          |         |     |     |
| E29_bin53 | <i>Bathyarchaeota</i>     |         |         |          |          |         |     |     |
| E29_bin60 | <i>Bathyarchaeota</i>     |         |         |          |          |         |     |     |
| E44_bin4  | <i>Bathyarchaeota</i>     |         |         |          |          |         |     |     |
| E44_bin43 | <i>Bathyarchaeota</i>     |         |         |          |          |         |     |     |
| E29_bin30 | <i>Thermoplasmata</i>     |         |         |          |          |         |     |     |



141 **Supplementary references**

- 142 1. Ley, R.E. et al. Unexpected diversity and complexity of the Guerrero Negro hypersaline  
143 microbial mat. *Appl Environ Microbiol* **72**, 3685-3695 (2006).
- 144 2. Baker, B.J., Lazar, C.S., Teske, A.P. & Dick, G.J. Genomic resolution of linkages in  
145 carbon, nitrogen, and sulfur cycling among widespread estuary sediment bacteria.  
146 *Microbiome* **3**, 14 (2015).
- 147 3. Hu, P. et al. Genome-resolved metagenomic analysis reveals roles for candidate phyla  
148 and other microbial community members in biogeochemical transformations in oil  
149 reservoirs. *MBio* **7**, e01669-01615 (2016).
- 150 4. Sieber, C.M.K. et al. Recovery of genomes from metagenomes via a dereplication,  
151 aggregation and scoring strategy. *Nat Microbiol* **3**, 836-843 (2018).
- 152 5. Parks, D.H. et al. A standardized bacterial taxonomy based on genome phylogeny  
153 substantially revises the tree of life. *Nat Biotechnol* (2018).
- 154 6. Quast, C. et al. The SILVA ribosomal RNA gene database project: improved data  
155 processing and web-based tools. *Nucleic Acids Res* **41**, D590-596 (2013).
- 156 7. Marshall, I.P.G., Karst, S.M., Nielsen, P.H. & Jørgensen, B.B. Metagenomes from deep  
157 Baltic Sea sediments reveal how past and present environmental conditions determine  
158 microbial community composition. *Mar Genomics* **37**, 58-68 (2018).
- 159 8. Ijiri, A. et al. Deep-biosphere methane production stimulated by geofluids in the Nankai  
160 accretionary complex. *Sci Adv* **4**, eaao4631 (2018).

161
